# Supplementary material for: Prevalence and metabolic risk factors of chronic kidney disease among a Mexican adult population: a cross-sectional study in primary healthcare medical units
Source: PeerJ. 2024 Jul 30;12:e17817. doi: 10.7717/peerj.17817 (PMC11296299; doi:10.7717/peerj.17817)
Supplement: Supplemental Information 1 [file peerj-12-17817-s001.xlsx]

## Sheet: DATABASE CKD
GENDER	GFR CKD_EPI	CKD	CATEGORY AC RATIO	ACR	CAT RISK GFR AND ACR	CKD CAT	AGE	AGE CAT	WEIGHT	HEIGHT	BMI	BMI CLASIF	BMI CAT	AC CAT	AC	SBP	DBP	HYPERTS IN TREAT AND CONTROLLED	WITH TREATMENT	CONTROL HYPERENS	KNOWN HYPERTENS	HYPERTENS	SERUM CR	TC	TG	TC_Y_TG_HIGHT	HDL-c	LDL-c	CAT LDL-c	CAT HDL-c	TG CAT	TC CAT	DYSLIPIDEMIA	UA CATEGORY	URIC ACID	TABAQUISM	ALCOHOLISM	HbA1c	GLUCOSE CLASIF	GLUCOSE CATEGORY	SERUM GLUCOSE
2	62.2	0	0	50	4	5	72	0	104.5	1.72	35.32	0	0	0	112	125	90				2	1		244.3	212.3	0	36.1	110.92	1	0	0	0	0	0	6.6	1	1	7.3	1	0	123.86
2	58.06	0	0	30	4	5	75	0	51	1.54	21.5	2	1	1	70	109	68				2	1		171.51	65.67	1	55.7	97.32	1	1	1	1	1	1	3.5	1	1		2	1	79.94
2	61.3	0	0	30	4	5	65	0	63	1.5	28	1	0	0	89	124	83	0	0	1	0	0		225.93	202.51	0	69.8	115.63	1	1	0	0	0	0	7.1	1	1	9.22	0	0	259.99
2	65.2	0	0	30	4	4	73	0	75	1.52	32.46	0	0	0	97	150	95		1	0	0	0		270.35	264.25	0	39.2	156.5	0	0	0	0	0	1	5.6	1	1	11.2	0	0	236.9
2	68.92	0	0	30	4	5	74	0	88	1.63	33.12	0	0	0	73	111	72				2	1		156.92	101.91	1	47	107.33	1	1	1	1	1	1	4.3	1	1		2	1	75.03
2	64.3	0	0	30	4	5	73	0	69	1.54	29.09	1	0	0	97	122	88	0	0	1	0	0		195.46	134.82	1	91.5	98.1	1	1	1	1	1	0	6.1	0	1	8.6	0	0	148.46
2	66.6	0	0	50	4	5	66	0	79	1.55	32.88	0	0	0	99	150	90	1	0	0	0	0		260.4	281.91	0	34.2	149.22	0	0	0	0	0	0	7.5	1	1	10.7	0	0	243.11
2	61.6	0	0	30	4	4	79	0	79	1.56	32.46	0	0	0	94	145	100	1	0	0	0	0		244.2	199.3	0	31.5	178.33	0	0	0	0	0	1	5.2	0	1	8.6	0	0	148.46
2	64.3	0	0	30	4	5	73	0	76	1.54	32.05	0	0	0	97	140	100	1	0	0	0	0		245.2	234.58	0	31.5	182.2	0	0	0	0	0	1	3.22	0	1	8.6	0	0	148.46
2	68	0	0	50	4	5	63	0	67	1.55	27.89	1	0	0	88	118	78				2	1		181.62	118.19	1	56	91.98	1	1	1	1	1	0	7.1	1	1		1	0	104.1
2	67.49	0	0	30	4	5	75	0	77	1.55	32.05	0	0	0	75	122	71				2	1		188.66	86.82	1	63.7	107.6	1	1	1	1	1	1	3.9	1	1		2	1	66.84
2	74	0	0	75	4	5	67	0	74	1.55	30.8	0	0	0	99	152	92		1	0	0	0		262.53	222.25	0	40	175.08	0	1	0	0	0	0	6.2	0	1	10.2	0	0	200.8
2	76.38	0	0	30	4	5	67	0	81	1.65	29.75	1	0	0	84	117	79				2	1		189.2	102.21	1	56	94.2	1	1	1	1	1	1	4.8	1	1		2	1	77.76
2	67.5	0	0	30	4	5	68	0	85.5	1.6	33.4	0	0	0	107	142	91		1	0	0	0		197.37	112.04	1	67.6	117.25	1	1	1	1	1	1	4.2	0	0		2	1	94.77
2	65.34	0	0	30	4	4	80	0	88	1.64	32.72	0	0	0	70	99	71				2	1		124.3	114.3	1	41.3	79.3	1	1	1	1	1	1	4.11	1	1		2	1	78.8
2	90.9	0	0	30	4	5	67	0	75	1.55	31.22	0	0	0	98	142	94				1	0		210.41	167.82	0	33	143.85	0	0	0	0	0	1	5.88	1	1		2	1	76.44
2	70.4	0	0	30	4	5	62	0	82	1.54	34.58	0	0	0	103	116	79				2	1		171.71	178.86	1	48.7	87.24	1	1	0	1	0	1	4.2	1	0		2	1	99.6
2	69	0	0	30	4	5	63	0	80	1.6	31.25	0	0	0	98	145	90	1	0	0	0	0		201.66	246.37	0	44.3	108.09	1	1	0	0	0	0	8.32	1	1	12.2	0	0	183.64
2	71.4	0	0	30	4	5	66	0	83	1.52	35.92	0	0	0	105	108	78				2	1		237.92	112.59	1	66.3	149.1	0	1	1	0	0	0	7.2	1	1		1	0	103.41
2	68.3	0	0	30	4	5	65	0	82	1.54	34.58	0	0	0	103	117	75				2	1		171.71	148.86	1	48.7	87.24	1	1	1	1	1	1	4.2	1	0		2	1	99.6
2	68.9	0	0	30	4	5	69	0	70	1.55	29.14	1	0	0	93	129	72				2	1		193.2	141.2	1	63.8	91.55	1	1	1	1	1	1	5.2	0	0		1	0	110.12
2	69.9	0	0	30	4	5	67	0	66.7	1.56	27.41	1	0	0	88	119	82	0	0	1	0	0		140.81	82.06	1	52	92.4	1	1	1	1	1	0	6.8	1	1		1	0	107.2
2	65.2	0	0	50	4	4	73	0	64.5	1.5	28.67	1	0	0	88	123	84	0	0	1	0	0		163.82	144.92	1	73.4	111.64	1	1	1	1	1	0	6.8	1	1		2	1	78.51
2	70.9	0	0	30	4	5	67	0	77.5	1.6	30.27	0	0	0	103	142	92				1	0		168.16	103.04	1	51	96.55	1	1	1	1	1	0	7.3	1	1		1	0	102.45
2	66.6	0	0	30	4	5	68	0	73	1.6	28.52	1	0	0	103	119	79	0	0	1	0	0		186	194.49	1	48.1	99	1	1	0	1	0	0	7.3	1	1		2	1	96.39
2	66.6	0	0	30	4	5	68	0	86	1.68	30.47	0	0	0	102	118	77				2	1		170.16	171.85	1	35	100.79	1	0	0	1	0	1	4.3	0	0		2	1	55.77
2	71.4	0	0	30	4	5	66	0	91.5	1.77	29.21	1	0	0	93	122	84	0	0	1	0	0		179	169	1	50	115.2	1	1	0	1	0	0	7.33	1	1		2	1	80
2	68.5	0	0	30	4	5	62	0	82	1.65	30.12	0	0	0	103	145	90	1	0	0	0	0		188.3	147.2	1	28	128.58	1	0	1	1	0	1	7.2	0	0	7.4	0	0	155.2
2	67.63	0	0	50	4	5	72	0	88	1.69	30.81	0	0	0	82	109	66				2	1		186.5	126.91	1	48	92.82	1	1	1	1	1	1	5.2	0	0		2	1	93
2	73.63	0	0	30	4	5	69	0	83	1.5	36.89	0	0	0	93	115	78				2	1		191.7	89.95	1	54.5	89.32	1	1	1	1	1	1	5.32	1	1		2	1	84.02
2	82.97	0	0	30	4	5	60	0	77	1.48	35.15	0	0	0	86	125	85				2	1		249.52	133.68	1	75.9	106.88	1	1	1	0	0	0	6.6	1	1		1	0	111.65
2	67.56	0	0	75	4	4	75	0	75	1.62	28.58	1	0	0	68	112	66				2	1		214.3	111.31	1	57.8	84.24	1	1	1	0	0	0	7.33	1	1	8	1	0	105.31
2	76.7	0	0	100	4	5	62	0	82	1.65	30.12	0	0	0	92	142	93				1	0		200.69	292.5	0	32	110.19	1	0	0	0	0	1	5.2	0	1		1	0	101.97
2	73.5	0	0	50	4	5	68	0	95.5	1.6	37.3	0	0	0	112	140	90	1	0	0	0	0		167.68	115.61	1	25	119.56	1	0	1	1	0	0	5.2	1	1		1	0	108.25
2	64.4	0	0	100	4	5	67	0	82	1.65	30.12	0	0	0	92	140	90	1	0	0	0	0		200.69	292.5	0	32	110.19	1	0	0	0	0	1	5.2	0	1		1	0	101.97
2	81.13	0	0	30	4	5	61	1	85.5	1.63	32.18	0	0	0	97	125	78				2	1		163	118.4	1	55.1	84.22	1	1	1	1	1	0	6.6	1	0	6	0	0	127
2	89.41	0	0	75	4	4	63	0	70	1.6	27.34	1	0	0	92	98	66				2	1		227.16	77.66	1	49.3	82.78	1	1	1	0	0	0	7.2	1	1	8.3	0	0	155.23
2	86.32	0	0	30	4	4	68	0	62.5	1.6	24.41	2	1	1	79	118	76				2	1		171.1	69.8	1	48	79.3	1	1	1	1	1	1	4.4	1	1		2	1	87.62
2	80.84	0	0	30	4	5	66	0	84	1.6	32.81	0	0	0	80	95	68				2	1		129.54	69.02	1	56.8	88.94	1	1	1	1	1	0	6.2	1	1		2	1	85.81
2	87.93	0	0	30	4	4	63	0	77	1.6	30.08	0	0	0	99	126	84	0	0	1	0	0		269.3	215.23	0	39.3	176.75	0	0	0	0	0	1	5.23	1	1		2	1	99.97
2	84.89	0	0	30	4	4	68	0	51	1.55	21.23	2	1	1	68	122	71				2	1		169.98	87.88	1	62.6	89.8	1	1	1	1	1	0	7.22	1	1		2	1	98.2
2	90.22	0	0	30	1	5	57	1	88	1.66	31.93	0	0	0	106	100	70				2	1		163.23	129.83	1	50.8	92.3	1	1	1	1	1	1	4.8	1	1		2	1	81.53
2	86.1	0	0	30	4	5	68	0	86.6	1.6	33.83	0	0	0	112	118	76				2	1		182.7	113.82	1	58.4	96.67	1	1	1	1	1	1	4.32	1	1		2	1	82.87
2	89.58	0	0	30	4	4	58	1	79	1.6	30.86	0	0	0	106	142	90	1	0	0	0	0		294.27	200.51	0	40.2	155.57	0	1	0	0	0	0	6.87	1	1	7.7	1	0	104.04
2	90.85	0	0	30	1	5	56	1	63.5	1.5	28.22	1	0	0	87	111	69				2	1		145.2	106.59	1	50	104.11	1	1	1	0	0	0	6.2	1	1		2	1	74.91
2	93.44	0	0	30	1	5	62	0	86.6	1.66	31.43	0	0	0	112	132	79				1	0		197.83	111.3	1	53.2	90.6	1	1	1	1	1	1	6.8	1	1		2	1	82.87
2	89.58	0	0	30	4	4	58	1	88	1.62	33.53	0	0	0	106	140	90	1	0	0	0	0		294.27	200.51	0	39.3	195.57	0	0	0	0	0	1	5.32	1	1	7.7	1	0	104.04
2	86.49	0	0	30	4	4	63	0	75	1.54	31.62	0	0	0	101	128	84	0	0	1	0	0		216.89	145.22	1	54.5	133.35	0	1	1	0	0	0	6.6	1	1	7.8	0	0	134.35
2	80.06	0	0	30	4	4	74	0	77	1.52	33.33	0	0	0	101	160	100				1	0		182.96	119.37	1	42	107.2	1	1	1	1	1	0	7.33	1	1		2	1	95.36
2	81.9	0	0	30	4	5	68	0	81	1.53	34.6	0	0	0	102	118	79	0	0	1	0	0		211.2	158.61	0	56.8	122.68	1	1	0	0	0	0	7.3	1	1		1	0	106.65
2	86	0	0	30	4	5	61	0	74.5	1.54	31.41	0	0	0	101	122	83	0	0	1	0	0		198.86	130.83	1	45.6	83	1	1	1	1	1	0	7.3	1	1		0	0	132.9
2	83.1	0	0	30	4	5	66	0	69	1.56	28.35	1	0	0	92	116	79	0	0	1	0	0		211.65	152.96	0	31	150.06	0	0	0	0	0	0	7.3	1	1		1	0	102.23
2	81.9	0	0	30	4	5	68	0	88	1.58	35.25	0	0	0	105	142	91	1	0	0	0	0		289.2	166.3	0	44.1	137.22	0	1	0	0	0	1	5.72	0	1		2	1	89.27
2	88.14	0	0	50	4	4	58	1	82.5	1.54	34.79	0	0	0	104	144	93		1	0	0	0		316.59	307.09	0	40.1	170.57	0	1	0	0	0	0	7.2	1	1		1	0	103.49
2	79.33	0	0	30	4	5	73	0	78	1.52	33.76	0	0	0	98	140	100		1	0	0	0		270.4	250.43	0	38.3	192.3	0	0	0	0	0	0	6.6	0	1	6.8	0	0	130.42
2	76.59	0	0	30	4	4	78	0	58	1.59	22.94	2	1	1	73	108	77				2	1		196.23	126.04	1	49	92.02	1	1	1	1	1	1	3.6	1	1		2	1	72.42
2	86.3	0	0	30	4	4	61	0	80	1.6	31.25	0	0	0	101	130	80	0	0	1	0	0		222.1	191.2	0	36	133.2	0	0	0	0	0	0	7.3	1	1		1	0	100.91
2	83.75	0	0	30	4	4	63	0	71	1.51	31.14	0	0	0	101	144	92	1	0	0	0	0		221.65	214.8	0	46.4	132.29	0	1	0	0	0	0	6.89	1	1		1	0	109.73
2	80.86	0	0	30	4	4	68	0	70	1.55	29.14	1	0	0	98	142	90	1	0	0	0	0		235.59	156.22	0	56.2	148.15	0	1	0	0	0	1	6.81	1	1		2	1	93.31
2	74.32	0	0	30	4	4	80	0	66	1.6	25.78	1	0	0	88	144	91				1	0		186.22	136.06	1	52	97.01	1	1	1	1	1	0	6.77	1	1		1	0	107.16
2	86	0	0	30	4	5	61	0	77	1.56	31.64	0	0	0	90	119	77	0	0	1	0	0		199.3	146.7	1	46.6	93.3	1	1	1	1	1	0	6.6	1	1		2	1	93.45
2	83.6	0	0	30	4	5	65	0	75	1.55	31.22	0	0	0	98	140	90				1	0		242.25	77.2	1	52	134.81	0	1	1	0	0	0	6.9	0	0		1	0	109.78
2	88.43	0	0	30	4	4	53	1	84	1.6	32.81	0	0	0	91	140	110	1	0	0	0	0		255.2	87.22	1	52.7	150.18	0	1	1	0	0	1	7.1	1	1		2	1	88.11
2	80.72	0	0	30	4	4	66	0	78	1.58	31.24	0	0	0	103	140	90				1	0		229.03	246.34	0	81	128.76	1	1	0	0	0	1	4.8	1	1		2	1	89.33
2	83.02	0	0	30	4	4	62	0	77	1.52	33.33	0	0	0	103	124	82	0	0	1	0	0		223.72	86.19	1	40	154.48	0	1	1	0	0	1	7	1	1		2	1	72.57
2	83.68	0	0	30	4	5	67	0	88	1.62	33.53	0	0	0	70	102	73				2	1		137.22	70.33	1	50.8	72.33	1	1	1	1	1	1	3.2	1	1		2	1	84.72
2	89.55	0	0	30	4	4	49	1	77	1.54	32.47	0	0	0	103	150	90				1	0		206.07	87.36	1	36.6	152	0	0	1	0	0	1	3.7	0	1		2	1	92.14
2	85.85	0	0	30	4	4	55	1	85	1.65	31.22	0	0	0	103	140	90				1	0		217.2	158.52	0	32	114.1	1	0	0	0	0	0	6.9	1	1		2	1	80.81
2	80.9	0	0	30	4	5	63	0	78	1.58	31.24	0	0	0	88	122	79	0	0	1	0	0		201.44	171.79	0	74.9	102.88	1	1	0	0	0	0	7.33	1	1	7.3	0	0	167.31
2	79.2	0	0	30	4	5	66	0	88	1.71	30.09	0	0	0	99	123	83	0	0	1	0	0		188.3	133.2	1	44.3	110.69	1	1	1	1	1	1	7	1			1	0	104.3
2	78.36	0	0	65	4	4	68	0	64	1.55	26.64	1	0	0	81	130	80				2	1		133.7	144	1	47.6	105.22	1	1	1	1	1	1	5.2	1	1		2	1	99.3
2	81.73	0	0	30	4	4	62	0	81	1.58	32.45	0	0	0	101	145	90		1	0	0	0		255.67	203.94	0	44.7	160.22	0	1	0	0	0	1	6.88	1	1		1	0	102.84
2	80.03	0	0	30	4	4	65	0	86	1.62	32.77	0	0	0	104	140	90		1	0	0	0		213.8	206.9	0	43	129.42	1	1	0	0	0	0	6.9	1	1		2	1	94.17
2	78.36	0	0	65	4	4	68	0	64	1.55	26.64	1	0	0	86	118	72				2	1		133.7	144.3	1	47.6	85.2	1	1	1	1	1	1	4.2	1	1		2	1	99.3
2	81.4	0	0	30	4	5	60	0	83	1.64	30.86	0	0	0	92	145	90				2	1		184.88	138.2	1	56.4	84.83	1	1	1	1	1	0	6.9	1	1		1	0	102.07
2	82.78	0	0	30	4	4	58	1	79.5	1.58	31.85	0	0	0	98	125	79	0	0	1	0	0		227.65	209.72	0	66	119.71	1	1	0	0	0	0	7.3	1	1	10.3	0	0	286.92
2	82.78	0	0	30	4	4	58	1	78	1.53	33.32	0	0	0	98	141	93	1	0	0	0	0		366.41	181.54	0	77.8	152.3	0	1	0	0	0	0	7.1	0	1	8.8	0	0	193.87
2	99.36	0	0	80	1	5	62	1	63.5	1.58	25.44	1	0	0	82	121	90				2	1		229.62	207.17	0	61.8	126.39	1	1	0	0	0	1	4.33	1	1		2	1	80.31
2	80.2	0	0	30	4	5	63	0	65	1.5	28.89	1	0	0	92	118	78				2	1		194.95	170.32	1	45.6	115.29	1	1	0	1	0	0	6.8	1	1		2	1	95.36
2	78	0	0	30	4	5	66	0	76.5	1.65	28.1	1	0	0	89	120	80				2	1		177.69	73.72	1	42	120.95	1	1	1	1	1	0	6.7	1	0		1	0	103.33
2	83.95	0	0	30	4	4	56	1	80	1.6	31.25	0	0	0	101	142	93				1	0		207.11	85.28	1	34	156.05	0	0	1	0	0	0	7.2	1	1		2	1	69.83
2	83.1	0	0	30	4	5	57	1	81	1.59	32.04	0	0	0	103	120	80				2	1		151	118	1	60	104.2	1	1	1	1	1	0	6.9	1	0		2	1	81
2	88.8	0	0	35	4	4	48	1	72	1.54	30.36	0	0	0	98	119	82	0	0	1	0	0		195.3	135.88	1	41	122.82	1	1	1	1	1	0	7.23	0	0		1	0	103.2
2	82.78	0	0	30	4	4	58	1	79.5	1.58	31.85	0	0	0	98	145	90	1	0	0	0	0		227.65	209.72	0	66	119.71	1	1	0	0	0	0	7.3	1	1	10.3	0	0	286.92
2	77.7	0	0	130	4	4	67	0	77	1.66	27.94	1	0	0	88	122	77	0	0	1	0	0		248.68	114.88	1	48	177.7	0	1	1	0	0	1	5.2	1	1		2	1	89.01
2	76.08	0	0	30	4	4	70	0	75	1.58	30.04	0	0	0	94	118	83	0	0	1	0	0		258.88	361.58	0	36	150.56	0	0	0	0	0	0	6.6	1	0	8.3	0	0	251.08
2	73.98	0	0	30	4	4	74	0	84	1.62	32.01	0	0	0	90	161	92				1	0		153.09	120.83	1	58	70.92	1	1	1	1	1	0	7.1	1	1		1	0	105.42
2	79.92	0	0	50	4	4	63	0	83	1.52	35.92	0	0	0	102	140	90	1	0	0	0	0		179	283.45	1	31	111.31	1	0	0	1	0	0	8.3	1	1		2	1	71.32
2	78.8	0	0	100	4	4	65	0	78	1.6	30.47	0	0	0	106	142	93				1	0		162.2	304.64	1	27	123.2	1	0	0	1	0	0	7.5	1	1		2	1	95.92
2	79.83	0	0	50	4	4	61	0	97	1.65	35.63	0	0	0	106	140	90	1	0	0	0	0		212.3	180	0	46	140.2	0	1	0	0	0	0	7.73	1	0		1	0	109
2	82.68	0	0	30	4	4	56	1	67	1.56	27.53	1	0	0	91	118	80				2	1		286.46	132.79	1	62.8	197.1	0	1	1	0	0	1	5.6	0	1		2	1	84.4
2	80.39	0	0	30	4	4	60	0	80	1.58	32.05	0	0	0	102	76	80				2	1		254.9	359.77	0	42	140.95	0	1	0	0	0	0	7.8	1	1	8.4	0	0	185.31
2	82.1	0	0	200	4	4	57	1	77	1.6	30.08	0	0	0	96	145	95		1	0	0	0		241.43	277.49	0	54.7	131.23	0	1	0	0	0	0	7.2	1	1	15.1	0	0	244.7
2	84.3	0	0	30	4	4	65	0	86	1.63	32.37	0	0	0	106	124	83	0	0	1	0	0		164.94	175.55	1	56.7	133.1	0	1	0	1	0	0	7.33	1	1		1	0	109.2
2	81.03	0	0	30	4	5	66	0	83.5	1.67	29.94	1	0	0	88	130	80				2	1		128	152	1	47	60.6	1	1	0	1	0	1	5.5	1	1		2	1	77
2	77.9	0	0	30	4	4	64	0	87	1.7	30.1	0	0	0	94	160	93				1	0		168.96	251.18	1	31	117.72	1	0	0	1	0	0	7.54	1	1		2	1	87.39
2	76.8	0	0	30	4	5	66	0	82	1.55	34.13	0	0	0	100	128	84	0	0	1	0	0		153	164	1	29	91.2	1	0	0	1	0	1	7	1	1		2	1	85
2	79.83	0	0	50	4	4	61	0	97	1.58	38.86	0	0	0	106	142	90	1	0	0	0	0		212.3	180	0	36.6	140.2	0	0	0	0	0	0	7.73	1	0		1	0	109
2	83.85	0	0	30	4	4	54	1	76.5	1.66	27.76	1	0	0	88	122	81	0	0	1	0	0		177.3	124.1	1	36	88.6	1	0	1	1	0	1	5.9	0	0	6	0	0	126
2	82.68	0	0	30	4	4	56	1	87	1.62	33.15	0	0	0	101	117	78				2	1		286.46	132.79	1	62.8	197.1	0	1	1	0	0	1	5.6	0	1		2	1	84.4
2	78.5	0	0	30	4	5	63	0	88	1.68	31.18	0	0	0	98	119	74				2	1		236	205.38	0	41	153.92	0	1	0	0	0	1	5.6	1	0		2	1	94
2	78.5	0	0	30	4	5	63	0	86	1.66	31.21	0	0	0	98	140	80				2	1		236	205.38	0	41	153.92	0	1	0	0	0	1	5.6	1	0		2	1	94
2	82.3	0	0	30	4	4	68	0	93	1.67	33.35	0	0	0	103	150	90				1	0		272	201	0	41	160.2	0	1	0	0	0	0	7.2	1	1		2	1	95
2	83.26	0	0	30	4	4	55	1	98	1.7	33.91	0	0	0	106	140	92		1	0	0	0		217	207	0	40	135.6	0	1	0	0	0	0	7.2	0	0	10.2	0	0	216
2	81.3	0	0	30	4	4	58	1	80.5	1.68	31.53	0	0	0	93	115	72				2	1		224	243.1	0	41	134.38	0	1	0	0	0	1	5.7	1	0		2	1	96
2	82.33	0	0	30	4	4	60	0	106	1.83	31.65	0	0	0	98	122	82	0	0	1	0	0		218.2	332.62	0	31	133.23	0	0	0	0	0	0	7.2	0	1		1	0	106
2	78.71	0	0	30	4	4	63	0	87	1.62	33.15	0	0	0	92	118	79	0	0	1	0	0		197.13	183.73	1	61.9	98.48	1	1	0	1	0	1	6.9	1	1		2	1	93.86
2	77.07	0	0	30	4	4	66	0	80	1.54	33.73	0	0	0	106	123	84	0	0	1	0	0		186	177	1	37.5	113.1	1	0	0	1	0	0	7.3	0	0		1	0	119
2	73.37	0	0	30	4	4	73	0	88	1.62	33.53	0	0	0	103	140	90	1	0	0	0	0		244.53	166.63	0	23.3	136.2	0	0	0	0	0	0	7.3	1	1		1	0	115.8
2	76.53	0	0	30	4	4	67	0	83.5	1.53	35.67	0	0	0	103	142	93	1	0	0	0	0		233.74	195.83	0	36	158.57	0	0	0	0	0	0	7.3	1	1	7	0	0	136.74
2	76	0	0	50	4	4	68	0	64	1.55	26.64	1	0	0	86	119	77				2	1		133.7	144.4	1	47.6	105.22	1	1	1	1	1	1	3.2	1	1		2	1	99.3
2	84.36	0	0	30	4	4	61	0	102	1.64	37.92	0	0	0	106	110	85				2	1		246.08	346.62	0	33	143.76	0	0	0	0	0	0	7.1	1	1	6.6	0	0	133.21
2	79.75	0	0	30	4	4	59	1	91	1.65	33.43	0	0	0	99	170	90		1	0	0	0		261.95	361.81	0	36	153.59	0	0	0	0	0	0	8.2	1	1	14.22	0	0	255.3
2	85.55	0	0	100	4	4	69	0	78	1.65	28.65	1	0	0	87	109	66				2	1		198.59	236.96	1	47.5	103.7	1	1	0	1	0	1	5.2	0	1		2	1	92.07
2	80.78	0	0	30	4	4	65	0	102	1.64	37.92	0	0	0	106	145	90		1	0	0	0		188.3	146.2	1	33	143.76	0	0	1	1	0	0	7.1	1	1	6.7	0	0	133.21
2	77.54	0	0	50	4	4	63	0	76.5	1.59	30.26	0	0	0	93	144	92				1	0		194.33	105	1	40.6	132.73	0	1	1	1	0	0	6.89	1	1		1	0	124.92
2	78.09	0	0	350	5	4	62	0	85	1.6	33.2	0	0	0	108	122	83		1	1	0	0		226.93	143.39	1	54.4	143.85	0	1	1	0	0	0	8.2	1	1	11.2	0	0	288.6
2	77.54	0	0	30	4	4	63	0	84	1.62	32.01	0	0	0	100	118	78	0	0	1	0	0		145.56	91.06	1	64.5	122.85	1	1	1	1	0	0	6.9	1	1		2	1	78.94
2	69.3	0	0	150	4	4	79	0	88	1.62	33.53	0	0	0	107	145	91	1	0	0	0	0		233.65	237.76	1	32	154.1	0	0	0	0	0	0	8.2	1	1	7.22	0	0	143.93
2	74.86	0	0	30	4	4	68	0	70	1.52	30.3	0	0	0	91	127	86	0	0	1	0	0		218.83	108.15	1	58.2	139	0	1	1	0	0	0	7.23	1	1	6.6	0	0	131.38
2	78.57	0	0	30	4	4	59	1	80	1.55	33.3	0	0	0	92	135	85	0	0	0	0	0		231.2	166.8	0	70	139.06	0	1	0	0	0	1	6.2	0	1	8.8	0	0	188.3
2	86.69	0	0	30	4	4	60	0	83	1.56	34.11	0	0	0	103	115	90				2	1		156.13	114.49	1	40	93.23	1	1	1	1	1	1	4.8	1	1		2	1	66.5
2	80.81	0	0	30	4	4	65	0	95	1.69	33.26	0	0	0	99	142	90	1	0	0	0	0		218.2	156.44	0	33	92.81	1	0	0	0	0	0	7.2	0	1		1	0	105.3
2	77.48	0	0	30	4	4	61	0	84	1.62	32.01	0	0	0	103	150	95				1	0		201.25	101.86	1	33.7	107.88	1	0	1	0	0	0	7.62	1			2	1	80.47
2	77.48	0	0	35	4	4	61	0	66	1.52	28.57	1	0	0	90	132	80				2	1		167.49	133.68	1	56.8	83.95	1	1	1	1	1	0	7.9	1	1	7.1	0	0	147.21
2	80.25	0	0	30	4	4	56	1	75	1.58	30.04	0	0	0	90	120	85				2	1		243.43	267.38	0	33	135.2	0	0	0	0	0	0	7.2	0	1		2	1	78.15
2	80.25	0	0	30	4	4	56	1	74.4	1.5	33.07	0	0	0	97	127	83	0	0	1	0	0		207.29	156.32	0	36.7	130.03	0	0	0	0	0	0	7.03	1	0		1	0	115.73
2	75.33	0	0	30	4	4	65	0	83	1.6	32.42	0	0	0	99	140	90	1	0	0	0	0		272.68	219.34	0	32.3	126.81	1	0	0	0	0	0	7.6	1	1	6.55	0	0	127.79
2	77.98	0	0	30	4	4	58	1	84	1.6	32.81	0	0	0	99	145	95	1	1	0	0	0		257.69	232.34	0	50	161.22	0	1	0	0	0	1	5.1	1	1		2	1	81.95
2	83.07	0	0	50	4	4	49	1	85.8	1.59	33.94	0	0	0	101	122	84	0	0	1	0	0		208.99	175.75	0	77.6	132.22	0	1	0	0	0	0	7.3	1	1	6.22	0	0	141.81
2	80.2	0	0	50	4	4	54	1	64	1.67	22.95	2	1	1	69	118	66				2	1		288.61	145.13	1	42	66.8	1	1	1	0	0	1	4.4	0	0		2	1	66.88
2	75.82	0	0	30	4	4	62	0	89.5	1.58	35.85	0	0	0	105	140	90		1	0	0	0		199.79	224.78	1	40	101.63	1	1	0	1	0	1	4.32	1	1		2	1	97.25
2	74.24	0	0	37	4	4	65	0	75	1.57	30.43	0	0	0	92	155	100		1	0	0	0		201.22	103.4	1	50	130.54	0	1	1	0	0	0	7.33	1	0		1	0	104.88
2	75.82	0	0	30	4	4	62	0	89.5	1.58	35.85	0	0	0	105	140	90		1	0	0	0		199.79	224.78	1	39.2	101.63	1	0	0	1	0	1	4.68	1	1		2	1	97.25
2	75.78	0	0	30	4	4	60	0	95	1.7	32.87	0	0	0	98	130	100				1	0		243.8	206.26	0	68.4	134.15	0	1	0	0	0	0	7.2	1	1	6.2	1	0	105.83
2	81.3	0	0	30	4	4	60	0	80	1.55	33.3	0	0	0	89	140	90	1	0	0	0	0		314.82	163.58	0	34.2	167.3	0	0	0	0	0	0	7.1	1	1		1	0	104.39
2	89.07	0	0	30	4	4	57	1	53.5	1.6	20.9	2	1	1	70	92	70				2	1		138.16	119.65	1	40	89.2	1	1	1	1	1	1	5.2	1	1		2	1	75.39
2	75.78	0	0	30	4	4	60	0	95	1.6	37.11	0	0	0	98	145	100	1	0	0	0	0		188.3	149.2	1	68.4	134.15	0	1	1	1	0	1	5.8	1	1	6.2	1	0	105.83
2	74.73	0	0	75	4	4	62	0	85	1.6	33.2	0	0	0	104	142	90	1	0	0	0	0		208.71	193.96	0	35	134.92	0	0	0	0	0	0	7.28	1	1		1	0	109.11
2	74.2	0	0	100	4	4	63	0	84	1.54	35.42	0	0	0	105	144	92	1	0	0	0	0		245.33	316.1	0	32.8	133.32	0	0	0	0	0	0	7.8	1	1		1	0	123.71
2	77.3	0	0	30	4	4	68	0	84	1.53	35.88	0	0	0	112	140	90	1	0	0	0	0		265.54	101.89	1	65	180.16	0	1	1	0	0	0	7.3	1	1		2	1	82.77
2	81.28	0	0	30	4	4	58	0	82	1.6	32.03	0	0	0	99	148	93	1	0	0	0	0		224.25	158.94	0	65.5	126.96	1	1	0	0	0	0	7.3	0	1	11.7	0	0	251.6
2	76.3	0	0	30	4	4	57	1	79	1.52	34.19	0	0	0	103	180	90				1	0		237.99	249.15	0	47	141.16	0	1	0	0	0	0	6.6	1	1		2	1	87.18
2	81.85	0	0	30	4	4	59	1	75	1.55	31.22	0	0	0	99	145	95	1	0	0	0	0		283.07	161.87	0	44	136.6	0	1	0	0	0	0	6.9	1	1		2	1	65.09
2	71.62	0	0	30	4	4	66	0	83	1.52	35.92	0	0	0	104	128	86	0	0	1	0	0		225.58	253.16	0	35.2	111.55	1	0	0	0	0	0	7.2	1	1		1	0	122.46
2	73.66	0	0	30	4	4	60	0	85	1.63	31.99	0	0	0	106	145	90	1	0	0	0	0		210.62	114.98	1	51.9	135.72	0	1	1	0	0	1	4.6	1	1		2	1	82.28
2	73.14	0	0	220	4	4	61	0	78.3	1.55	32.59	0	0	0	89	144	90				1	0		232.61	70.78	1	65.2	153.25	0	1	1	0	0	0	7.1	1	1		1	0	105.58
2	72.63	0	0	30	4	4	62	0	53.7	1.55	22.35	2	1	1	70	107	72				2	1		190.2	169.38	1	80.3	106.02	1	1	0	1	0	1	4.3	1	1		2	1	79.59
2	75.23	0	0	100	4	4	57	1	105	1.72	35.49	0	0	0	116	145	90				1	0		176.46	144.92	1	39.2	108.28	1	0	1	1	0	0	8.2	1	1		1	0	108.74
2	79.58	0	0	30	4	4	59	1	74.5	1.52	32.25	0	0	0	99	140	90		1	0	0	0		269.76	240.93	0	63.7	157.87	0	1	0	0	0	0	6.9	1	1		2	1	95
2	81.84	0	0	130	4	4	65	0	75	1.56	30.82	0	0	0	82	122	83	0	0	1	0	0		178	85.53	1	46	114.89	1	1	1	1	1	1	7.23	1	1		2	1	93
2	78.47	0	0	50	4	4	51	1	96	1.66	34.84	0	0	0	103	140	90				1	0		192.62	140.94	1	57.2	98.3	1	1	1	1	1	0	7.03	1	1		2	1	82.87
2	73.66	0	0	30	4	4	60	0	75	1.63	28.23	1	0	0	106	126	84	0	0	1	0	0		210.62	114.98	1	51.9	135.72	0	1	1	0	0	1	4.2	1	1		2	1	82.28
2	73.14	0	0	220	4	4	61	0	78.3	1.55	32.59	0	0	0	89	140	90	1	0	0	0	0		232.61	70.78	1	65.2	153.25	0	1	1	0	0	1	4.8	1	1		1	0	105.58
2	63.56	0	0	210	4	4	81	0	80	1.6	31.25	0	0	0	98	127	84	0	0	1	0	0		196.72	355.23	1	50.3	115.37	1	1	0	1	0	0	6.9	1	1		1	0	105.15
2	69.15	0	0	50	4	4	69	0	74	1.53	31.61	0	0	0	93	145	95	1	0	0	0	0		279.3	188.82	0	34	138.3	0	0	0	0	0	0	7.4	1	1	14.3	0	0	248.1
2	68.18	0	0	30	4	4	71	0	91	1.55	37.88	0	0	0	96	155	100		1	0	0	0		248.4	206.19	0	39	168.16	0	0	0	0	0	1	5.32	0	1		2	1	93.28
2	71.12	0	0	30	4	4	65	0	77.5	1.5	34.44	0	0	0	101	150	100	1	0	0	0	0		189.39	230.21	1	34	109.35	1	0	0	1	0	0	6.32	1	1		1	0	106.08
2	71.12	0	0	30	4	4	65	0	80	1.6	31.25	0	0	0	101	145	90	1	0	0	0	0		221.2	242.72	0	44.5	128.24	1	1	0	0	0	0	6.9	1	1		1	0	101.24
2	72.12	0	0	100	4	4	63	0	68	1.5	30.22	0	0	0	94	121	79	0	0	1	0	0		208.94	193.87	0	39	131.17	0	0	0	0	0	0	7.2	1	1	13.22	0	0	261.2
2	71.12	0	0	30	4	4	65	0	70	1.52	30.3	0	0	0	89	124	83	0	0	1	0	0		177.64	324.2	1	36.7	126.1	1	0	0	1	0	0	7.1	1	1		2	1	99.9
2	69.63	0	0	30	4	4	68	0	76.5	1.55	31.84	0	0	0	99	140	90		1	0	0	0		271.21	161.88	0	65.2	133.63	0	1	0	0	0	0	7.6	1	1		1	0	123.03
2	70.12	0	0	30	4	4	67	0	82	1.61	31.63	0	0	0	99	150	100				1	0		185.36	143.39	1	56.1	100.58	1	1	1	1	1	0	6.99	1	1		2	1	84.23
2	64.46	0	0	30	4	4	79	0	60	1.61	23.15	2	1	1	70	120	80				2	1		177.14	121.87	1	57.6	88.3	1	1	1	1	1	1	3.55	1	1		2	1	89.26
2	70.62	0	0	30	4	4	66	0	88	1.62	33.53	0	0	0	98	155	90		1	0	0	0		314.96	193.55	0	61	145.3	0	1	0	0	0	0	7.52	1	1	13.5	0	0	260.15
2	71.12	0	0	30	4	4	65	0	77.5	1.5	34.44	0	0	0	101	150	100		1	0	0	0		189.39	230.21	1	34	109.35	1	0	0	1	0	1	5.32	1	1		1	0	106.08
2	84.78	0	0	30	4	4	58	1	80	1.62	31.3	0	0	0	69	110	70				2	1		227.39	155.71	0	62.1	134.15	0	1	0	0	0	1	4.4	1	1		2	1	79.53
2	72.64	0	0	300	4	4	60	0	84	1.6	32.81	0	0	0	103	140	90		1	0	0	0		190.6	77.6	1	55.6	119.48	1	1	1	1	1	0	7.6	1	1	5.9	0	0	130.25
2	69.64	0	0	50	4	4	66	0	100	1.65	36.73	0	0	0	116	150	100		1	0	0	0		216.2	152.64	0	33	133.2	0	0	0	0	0	0	9.33	0	1		1	0	103.67
2	70.62	0	0	30	4	4	64	0	77	1.56	31.64	0	0	0	92	123	83	0	0	1	0	0		225.36	268.33	0	77.9	133.48	0	1	0	0	0	0	7.3	1	1	11.2	0	0	234.66
2	69.15	0	0	30	4	4	67	0	88	1.61	33.95	0	0	0	92	110	80				2	1		151	120	1	48	79	1	1	1	1	1	0	6.6	0	0		2	1	99
2	71.14	0	0	30	4	4	61	0	81.5	1.52	35.28	0	0	0	101	140	90	1	0	0	0	0		182	188.3	1	42.55	101.79	1	1	0	1	0	0	7.3	1	1		1	0	107
2	73.17	0	0	30	4	4	57	1	79	1.6	30.86	0	0	0	96	122	79	0	0	1	0	0		243.2	178.33	0	39.3	109.99	1	0	0	0	0	1	5.6	0	0		1	0	103
2	72.65	0	0	30	4	4	58	1	84	1.62	32.01	0	0	0	105	140	90	1	0	0	0	0		293.13	271.86	0	56.2	182.56	0	1	0	0	0	0	7.7	0	1	12.2	0	0	259.17
2	72.14	0	0	30	4	4	59	1	84	1.64	31.23	0	0	0	99	124	84	0	0	1	0	0		242.88	353.9	0	36	136.1	0	0	0	0	0	0	6.9	1	1	12.11	0	0	236
2	84.2	0	0	30	4	4	67	0	85	1.62	31.3	0	0	0	73	110	80				2	1		193.19	143.84	1	44.6	119.82	1	1	1	1	1	0	6.6	1	1	6.8	0	0	127.71
2	71.14	0	0	30	4	3	61	0	81.5	1.52	35.28	0	0	0	101	140	90		1	0	0	0		182	188.3	1	42.55	101.79	1	1	0	1	0	0	7.3	1	1		1	0	107
2	73.17	0	0	30	4	3	57	1	79	1.6	30.86	0	0	0	96	116	77	0	0	1	0	0		243.2	178.33	0	39.3	109.99	1	0	0	0	0	0	6.6	0	0		1	0	103
2	66.78	0	0	30	4	3	70	0	78.5	1.58	31.45	0	0	0	98	145	95	1	0	0	0	0		226.32	153.74	0	49.4	146.17	0	1	0	0	0	0	6.33	1	1		1	0	101.19
2	66.78	0	0	100	4	3	70	0	93	1.67	33.35	0	0	0	113	145	90	1	0	0	0	0		220.44	251.27	0	34	136.19	0	0	0	0	0	0	7.7	1	1	11.2	0	0	273.76
2	67.25	0	0	150	4	3	69	0	78	1.55	32.47	0	0	0	101	119	82	0	0	1	0	0		188	165.3	1	39.2	110.44	1	0	0	1	0	1	6.9	1	1		2	1	89
2	66.78	0	0	30	4	4	70	0	85	1.69	29.76	1	0	0	102	110	90				2	1		249.3	153.17	0	69.5	101.2	1	1	0	0	0	0	7.23	0	0	7.4	1	0	102.89
2	69.17	0	0	50	4	4	65	0	113	1.84	33.38	0	0	0	123	145	90				1	0		160.97	238.91	1	23	120.19	1	0	0	1	0	0	7.8	1	1		1	0	110.13
2	70.15	0	0	30	4	4	63	0	80	1.6	31.25	0	0	0	101	150	100	1	0	0	0	0		232.4	100.19	1	46.9	165.46	0	1	1	0	0	0	7.8	1	1		1	0	118.05
2	64.02	0	0	30	4	4	76	0	91	1.52	39.39	0	0	0	112	155	95	1	0	0	0	0		245.41	119.7	1	33.7	139.2	0	0	1	0	0	0	7.44	1	1		2	1	78
2	70.64	0	0	30	4	4	62	0	75	1.55	31.22	0	0	0	92	145	90				1	0		217.29	229.12	0	30.3	121.17	1	0	0	0	0	0	7.3	1	1	7.2	1	0	113.36
2	69.17	0	0	150	4	4	65	0	84	1.62	32.01	0	0	0	106	145	100		1	0	0	0		212.03	369.37	0	26	122.16	1	0	0	0	0	0	7.32	1	1	13.44	0	0	266.7
2	69.65	0	0	30	4	4	64	0	78	1.6	30.47	0	0	0	98	120	80				2	1		207.3	153.8	0	38	124.24	1	0	0	0	0	0	7.1	1	1		1	0	107.53
2	66.78	0	0	50	4	4	70	0	59.9	1.6	23.4	2	1	1	72	120	80				2	1		118.3	145.2	1	71.8	98.3	1	1	1	1	1	0	6.6	1	1		2	1	93.3
2	68.2	0	0	50	4	4	67	0	87.5	1.62	33.34	0	0	0	95	122	82	0	0	1	0	0		209.93	197.63	0	45.1	125.3	1	1	0	0	0	1	5.88	0	0		2	1	88.53
2	69.17	0	0	30	4	4	65	0	87	1.65	31.96	0	0	0	102	126	85	0	0	1	0	0		188.3	144.2	1	69.5	166.36	0	1	1	1	0	1	6.2	0	0	7.4	1	0	102.89
2	74.75	0	0	30	4	4	52	1	78	1.57	31.64	0	0	0	102	145	110		1	0	0	0		245.23	296.43	0	43	113.3	1	1	0	0	0	0	7.2	1	0		1	0	119.23
2	71.67	0	0	240	4	4	58	1	91	1.7	31.49	0	0	0	92	132	82	0	0	1	0	0		218.3	200.38	0	40	105.69	1	1	0	0	0	0	7.87	0	0		1	0	113.95
2	72.68	0	0	30	4	4	56	1	80	1.52	34.63	0	0	0	98	130	90				2	1		251.2	235.14	0	31.3	118.2	1	0	0	0	0	0	6.65	1	1	7.4	0	0	174.3
2	72.17	0	0	30	4	4	57	1	82	1.6	32.03	0	0	0	103	120	80				2	1		243.53	325.22	0	37.2	155.2	0	0	0	0	0	0	7.32	0	0	6.6	0	0	136.02
2	74.23	0	0	30	4	4	53	1	82.5	1.58	33.05	0	0	0	109	170	90		1	0	0	0		235	179.23	0	39.6	131.44	0	0	0	0	0	0	7.2	1	1		1	0	115.14
2	66.34	0	0	30	4	4	69	0	62.5	1.53	26.7	1	0	0	87	120	80				2	1		224.8	167.2	0	49	95.2	1	1	0	0	0	1	5.3	1	0		2	1	98.3
2	69.68	0	0	50	4	4	62	0	99	1.6	38.67	0	0	0	112	140	90	1	0	0	0	0		242.99	176.51	0	70.8	136.89	0	1	0	0	0	0	7.32	1	1		1	0	106.99
2	68.71	0	0	30	4	4	64	0	82	1.6	32.03	0	0	0	92	140	95		1	0	0	0		240.32	222.97	0	32.3	106.67	1	0	0	0	0	0	6.6	1	1		2	1	95.64
2	69.19	0	0	30	4	4	63	0	84.5	1.54	35.63	0	0	0	98	155	90	1	0	0	0	0		193.14	202.65	1	37	115.61	1	0	0	1	0	0	7.34	1	1	6	0	0	133.72
2	69.19	0	0	50	4	4	63	0	92	1.69	32.21	0	0	0	99	140	90		1	0	0	0		219.87	269.93	0	32.4	124.48	1	0	0	0	0	0	7.33	1	1	8.5	0	0	140.68
2	71.2	0	0	75	4	4	57	1	72.5	1.64	26.96	1	0	0	87	120	80				2	1		250.1	324.53	0	44.7	140.49	0	1	0	0	0	0	7.1	1	1		1	0	103.04
2	75.85	0	0	50	4	4	58	1	94.5	1.7	32.7	0	0	0	99	155	100				1	0		208	189.16	0	51	119.17	1	1	0	0	0	0	7.3	0	0		1	0	115
2	70.21	0	0	30	4	4	59	1	82	1.62	31.25	0	0	0	99	145	90		1	0	0	0		282.42	178.3	0	37.2	199.26	0	0	0	0	0	0	7.2	1	1	9.1	0	0	158.7
2	73.23	0	0	50	4	4	53	1	105.5	1.73	35.25	0	0	0	113	125	90				2	1		221	196	0	36.8	145	0	0	0	0	0	0	7.9	1	0		1	0	109
2	76.92	0	0	30	4	4	66	0	100.5	1.74	33.19	0	0	0	101	125	80				2	1		216.2	192.33	0	34	133.32	0	0	0	0	0	0	6.9	0	1		2	1	85
2	70.71	0	0	30	4	4	58	1	83	1.69	29.06	1	0	0	101	120	80				2	1		190	281.49	1	30	103.7	1	0	0	1	0	0	7.3	0	1		1	0	111
2	66.84	0	0	150	4	4	66	0	85.5	1.66	31.03	0	0	0	101	150	100	1	0	0	0	0		316.04	159.43	0	84	160.15	0	1	0	0	0	1	5.55	0	1		2	1	98.27
2	64.08	0	0	30	4	4	72	0	79	1.52	34.19	0	0	0	103	125	84	0	0	1	0	0		181.47	121.82	1	30.3	116.81	1	0	1	1	0	0	7.6	1	1	6.4	2	1	98.72
2	69.77	0	0	30	4	4	58	1	54.5	1.62	20.77	2	1	1	78	120	70				2	1		149.32	116.6	1	67.1	93.32	1	1	1	1	1	1	3.9	1	1		1	0	109
2	66.42	0	0	30	4	4	65	0	59.5	1.6	23.24	2	1	1	68	140	90		1	0	0	0		187.25	148.2	1	52.3	77.9	1	1	1	1	1	1	5.33	1	1		1	0	110.24
2	58.99	0	1	20	6	4	80	0	74	1.65	27.18	1	0	0	93	127	86	0	0	1	0	0		206.84	118.28	1	38	145.18	0	0	1	0	0	1	7.2	0	1		2	1	96.97
2	77.04	0	0	30	4	4	62	0	82	1.69	28.71	1	0	0	94	125	82	0	0	1	0	0		257.49	381.15	0	50.6	130.66	0	1	0	0	0	1	4.22	1	1		2	1	88.7
2	68.44	0	0	30	4	4	57	1	62	1.5	27.56	1	0	0	88	130	80				2	1		238.39	180.53	0	66.2	136.08	0	1	0	0	0	0	7.3	1	1		1	0	102.65
2	75.51	0	0	85	4	4	43	1	52.6	1.58	21.07	2	1	1	70	100	70				2	1		269.87	204.23	0	64.3	164.72	0	1	0	0	0	1	3.3	1	1		1	0	111.9
2	59.12	0	0	100	7	4	76	0	82	1.61	31.63	0	0	0	96	150	90		1	0	0	0		374.33	175.2	0	33	188.2	0	0	0	0	0	0	7.52	1	1	11.5	0	0	148.45
2	62.97	0	0	50	4	4	67	0	88	1.6	34.37	0	0	0	103	110	88	0	0	1	0	0		261.84	165.12	0	42	186.82	0	1	0	0	0	0	7	1	1		2	1	70.64
2	64.77	0	0	30	4	4	63	0	77	1.52	33.33	0	0	0	101	145	90		1	0	0	0		280.67	101.2	1	55.2	144.2	0	1	1	0	0	0	6.8	1	1	8.6	0	0	180.2
2	65.69	0	0	30	4	4	61	0	79	1.6	30.86	0	0	0	103	155	90		1	0	0	0		285.67	199.3	0	30.5	185.28	0	0	0	0	0	1	5.6	1	1	8.6	0	0	181.81
2	62.53	0	0	150	4	4	68	0	75	1.5	33.33	0	0	0	97	123	81	0	0	1	0	0		317.48	165.24	0	83.1	162.3	0	1	0	0	0	0	6.6	1	1	10.1	0	0	157.44
2	61.66	0	0	200	4	4	70	0	72.5	1.52	31.38	0	0	0	99	150	100		1	0	0	0		197.52	125.11	1	43.3	129.2	1	1	1	1	1	0	7.2	1	1	10.3	0	0	140.07
2	59.19	0	1	10	6	3	74	0	65.5	1.55	27.26	1	0	0	87	107	90				2	1		259.58	177.69	0	56.7	167.34	0	1	0	0	0	1	5.32	0	1		2	1	89.12
2	57.55	0	0	300	7	3	78	0	88	1.63	33.12	0	0	0	89	145	90		1	0	0	0		249.51	354.97	0	34.6	98.82	1	0	0	0	0	0	7.1	1	1	7	0	0	167.87
2	59.19	0	1	10	6	3	74	0	65.5	1.55	27.26	1	0	0	87	125	85				2	1		259.58	177.69	0	56.7	167.34	0	1	0	0	1	1	5.32	0	1		2	1	89.12
2	56.83	0	0	250	7	3	78	0	72	1.54	30.36	0	0	0	87	145	92	1	0	0	0	0		288.72	141.29	1	69	144.3	0	1	1	0	0	0	6.6	1	1		1	0	104.75
2	68.69	0	0	30	4	4	51	1	67.8	1.59	26.82	1	0	0	87	128	84	0	0	1	0	0		260.35	188.54	0	48.8	173.84	0	1	0	0	0	1	5.23	1	0		2	1	83.22
2	58.04	0	0	30	7	3	75	0	78	1.6	30.47	0	0	0	93	122	79	0	0	1	0	0		198.48	108.24	1	58	118.83	1	1	1	1	1	1	4.3	1	1		2	1	87.49
2	62.7	0	0	220	4	4	64	0	89	1.52	38.52	0	0	0	113	145	93		1	0	0	0		296.53	203.64	0	83.1	132.7	0	1	0	0	0	0	7.8	1	1	7.7	0	0	150.85
2	58.04	0	0	30	7	3	75	0	65	1.65	23.88	2	1	1	70	122	81	0	0	1	0	0		167.38	95.7	1	63.7	78.3	1	1	1	1	1	0	6.3	1	1		1	0	111.19
2	65.5	0	0	30	4	4	56	1	52	1.58	20.83	2	1	1	72	130	80				2	1		115.69	144.3	1	67.9	89.3	1	1	1	1	1	1	4.23	1	1		2	1	95.65
2	74.33	0	0	30	4	4	68	0	95	1.72	31.33	0	0	0	68	118	68				2	1		234.62	100.23	1	57.3	157.27	0	1	1	0	0	1	3.2	1	1		2	1	80.05
2	67.84	0	0	30	4	4	51	1	78.3	1.64	29.11	1	0	0	96	145	100				1	0		187.5	214.34	1	44.1	100.53	1	1	0	1	0	1	3.7	1	1		2	1	65.11
2	61.49	0	0	30	4	4	65	0	72	1.58	28.84	1	0	0	90	125	83	0	0	1	0	0		271.83	76	1	75.4	181.23	0	1	1	0	0	0	7.3	1	1		1	0	109.54
2	59.36	0	1	10	6	3	70	0	77	1.54	32.47	0	0	0	103	130	70				2	1		249.74	105.08	1	56	132.33	0	1	1	0	0	0	7.33	1	1		1	0	122.36
2	62.46	0	0	350	5	4	61	0	75.5	1.62	28.77	1	0	0	93	155	90		1	0	0	0		157.57	110.55	1	33	102.46	1	0	1	1	0	0	7.3	1	1		0	0	264.88
2	59.46	0	0	30	7	3	68	0	73	1.62	27.82	1	0	0	90	123	81	0	0	1	0	0		235.53	119.93	1	76.6	134.94	0	1	1	0	0	0	6.6	1	1		2	1	88.42
2	59.04	0	0	30	7	3	69	0	88	1.6	34.37	0	0	0	98	145	90		1	0	0	0		273.2	199.2	0	44.3	156.2	0	1	0	0	0	1	6.9	1	1	12.3	0	0	267.43
2	66.07	0	0	100	4	4	53	1	78	1.5	34.67	0	0	0	81	150	92	1	0	0	0	0		113.7	141.37	1	42.3	109.2	1	1	1	1	1	0	6.6	1	1		1	0	103.9
2	57.81	0	0	50	7	3	72	0	89	1.6	34.77	0	0	0	112	155	90	1	0	0	0	0		171.92	191.8	1	39	94.56	1	0	0	1	0	0	7.9	1	1		1	0	103.15
2	55.04	0	0	30	7	3	79	0	50.2	1.55	20.89	2	1	1	71	106	77				2	1		161.2	104.32	1	64.3	96.12	1	1	1	1	1	1	4.44	1	1		1	0	124.73
2	56.61	0	0	67	7	3	75	0	99	1.54	41.74	0	0	0	113	105	69				2	1		215.87	295.76	0	56.9	99.82	1	1	0	0	0	0	8.5	1	1	7.4	1	0	102.98
2	51.67	0	0	100	7	3	88	0	78.8	1.62	30.03	0	0	0	93	110	72				2	1		179.87	92.31	1	62.5	98.91	1	1	1	1	1	0	6.9	0	1		2	1	78.65
2	61.59	0	0	58	4	4	63	0	76	1.62	28.96	1	0	0	89	122	82	0	0	1	0	0		190.09	65.69	1	56.7	120.25	1	1	1	1	1	0	6.1	1	1		2	1	70.6
2	57.51	0	0	300	7	3	71	0	79	1.65	29.02	1	0	0	90	144	90		1	0	0	0		257.32	191.01	0	45.8	133.72	0	1	0	0	0	0	7.2	1	1		1	0	120.13
2	59.99	0	0	30	7	3	65	0	90.5	1.62	34.48	0	0	0	103	142	90				1	0		214.4	216.05	0	65.9	105.29	1	1	0	0	0	1	5.2	1	0		2	1	95.27
2	53.99	0	0	95	7	3	80	0	79	1.55	32.88	0	0	0	103	125	85				2	1		210.6	185.08	0	32.1	131.48	0	0	0	0	0	0	7.33	1	1	6.3	0	0	136.03
2	61.38	0	0	50	4	4	60	0	88	1.6	34.37	0	0	0	106	150	100		1	0	0	0		220.29	132.33	1	49.5	144.32	0	1	1	0	0	0	8.2	1	1	16.5	0	0	281.8
2	69.65	0	0	30	4	4	62	0	72	1.52	31.16	0	0	0	101	124	83	0	0	1	0	0		292.88	324.63	0	92	166.78	0	1	0	0	0	0	6.6	0	0	12.3	0	0	231.4
2	65.39	0	0	50	4	4	51	1	83	1.62	31.63	0	0	0	103	140	90				1	0		221.2	154.2	0	32.3	135.2	0	0	0	0	0	0	7.1	1	1		2	1	92
2	72.14	0	0	30	4	4	67	0	83.5	1.63	31.33	0	0	0	93	120	80				2	1		160	148.3	1	64	95.2	1	1	1	1	1	1	5.8	0	0		2	1	93.7
2	58.03	0	0	150	7	3	68	0	86.5	1.6	33.79	0	0	0	98	160	90		1	0	0	0		265.24	194.75	0	61.7	164.59	0	1	0	0	0	0	6.7	1	1	13.1	0	0	267.43
2	58.03	0	0	50	7	3	68	0	89	1.6	34.77	0	0	0	103	145	95		1	0	0	0		204.75	145.07	1	54.7	121.04	1	1	1	0	0	0	7.3	1	1	9.1	0	0	140.19
2	57.62	0	0	30	7	3	69	0	87	1.46	40.81	0	0	0	118	122	83	0	0	1	0	0		219.01	245.13	0	48.1	121.88	1	1	0	0	0	0	10.3	0	1	9.2	0	0	184.24
2	59.68	0	1	10	6	3	64	0	80	1.54	33.73	0	0	0	96	140	90				1	0		213.98	104.7	1	47.4	145.64	0	1	1	0	0	0	6.88	1	1		1	0	109.46
2	58.44	0	0	30	7	3	67	0	72.5	1.54	30.57	0	0	0	99	140	90	1	0	0	0	0		221.21	200.36	0	51.4	129.74	1	1	0	0	0	0	7.23	0	1		1	0	124.36
2	57.22	0	0	30	7	3	70	0	82	1.6	32.03	0	0	0	104	123	81	0	0	1	0	0		156.18	112.14	1	59.7	74.05	1	1	1	1	1	0	6.32	0	0	7	0	0	148.02
2	60.52	0	0	30	7	4	62	0	84	1.66	30.48	0	0	0	98	170	100		1	0	0	0		251	383	0	39	121.4	1	0	0	0	0	1	5.8	0	0	7.2	0	0	184
2	58.03	0	1	10	6	3	68	0	87	1.66	31.57	0	0	0	104	140	100		1	0	0	0		266.2	147.85	1	53.1	93.2	1	1	1	0	0	1	4.1	1	1		1	0	100.64
2	58.03	0	0	30	7	3	68	0	86.5	1.6	33.79	0	0	0	98	110	81	0	0	1	0	0		265.24	194.75	0	31.7	164.59	0	0	0	0	0	1	6.8	1	1	11.3	0	0	267.43
2	57.33	0	0	34	7	3	68	0	78	1.59	30.85	0	0	0	109	145	95	1	0	0	0	0		339.21	264	0	34.8	141.51	0	0	0	0	0	0	6.98	1	1	12.9	0	0	198.6
2	65.52	0	0	30	4	4	49	1	90	1.68	31.89	0	0	0	90	150	90		1	0	0	0		164.83	359.87	1	32	160.86	0	0	0	1	0	0	7.2	1	1		1	0	108.22
2	65.06	0	0	40	4	4	50	1	86	1.6	33.59	0	0	0	101	155	90				1	0		215.1	169.4	0	52	133.1	0	1	0	0	0	0	6.9	1	1		1	0	125.14
2	60.65	0	0	30	4	4	60	0	76	1.81	23.2	2	1	1	79	110	60				2	1		166.37	148.32	1	46	89.32	1	1	1	1	1	1	4.5	1	1		2	1	83.01
2	57.74	0	0	30	7	3	67	0	105	1.72	35.49	0	0	0	106	140	90		1	0	0	0		349.77	157.49	0	73.4	144.87	0	1	0	0	0	0	7.3	1	1		1	0	116.39
2	58.97	0	0	100	7	3	64	0	83	1.61	32.02	0	0	0	101	150	90		1	0	0	0		258.82	176.2	0	37.3	146.28	0	0	0	0	0	0	7.82	0	1	11.3	1	0	108.95
2	54.58	0	1	10	6	3	75	0	68	1.6	26.56	1	0	0	89	125	70				2	1		221.33	117.57	1	43.4	154.42	0	1	1	0	0	0	6.2	1	1		2	1	86.02
2	59.93	0	1	20	6	3	60	0	95	1.75	31.02	0	0	0	98	120	80				2	1		241.49	266.65	0	33.6	134.56	0	0	0	0	0	1	5	1	0		2	1	99.02
2	55.86	0	0	30	7	3	70	0	80	1.55	33.3	0	0	0	106	140	90		1	0	0	0		243.85	139.32	1	64.7	151.29	0	1	1	0	0	0	7.2	1	1		1	0	124.95
2	59.09	0	0	30	7	3	62	0	94.5	1.58	37.85	0	0	0	106	155	90		1	0	0	0		210.89	175	0	40	125.94	1	1	0	0	0	0	7.9	0	1	6.8	1	0	108.9
2	54.7	0	0	30	7	3	73	0	58	1.45	27.59	1	0	0	91	123	83	0	0	1	0	0		311.31	214.74	0	41	146	0	1	0	0	0	0	6.6	1	1		1	0	113.72
2	57.86	0	0	50	7	3	65	0	95	1.64	35.32	0	0	0	109	140	95		1	0	0	0		213.92	254.47	0	56.3	106.73	1	1	0	0	0	0	7.8	1	1		1	0	117.11
2	54.32	0	1	10	6	3	74	0	69.5	1.55	28.93	1	0	0	89	120	80				2	1		267.77	202.41	0	64.7	112.2	1	1	0	0	0	0	7.2	1	1		1	0	110.91
2	56.65	0	0	210	7	3	68	0	86	1.66	31.21	0	0	0	87	140	100		1	0	0	0		311.2	153.91	0	32.7	146.27	0	0	0	0	0	0	7.23	1	1	6.6	0	0	139.73
2	56.26	0	0	30	7	3	69	0	82	1.6	32.03	0	0	0	106	123	82	0	0	1	0	0		257.49	224.62	0	39.6	152.97	0	0	0	0	0	0	7.33	1	1		1	0	105.56
2	58.68	0	0	100	7	3	63	0	88	1.67	31.55	0	0	0	92	150	95		1	0	0	0		165.29	180.77	1	29.3	99.84	1	0	0	1	0	0	7.2	0	1		1	0	101
2	55.47	0	0	210	7	3	71	0	82	1.59	32.44	0	0	0	98	165	90		1	0	0	0		243.99	224.06	0	39.3	139.88	0	0	0	0	0	0	7.23	1	1	14	0	0	241.66
2	51.71	0	1	10	6	3	81	0	59	1.6	23.05	2	1	1	73	120	70				2	1		129.78	66.64	1	54.6	61.85	1	1	1	1	1	1	4.22	0	1		2	1	86.34
2	58.81	0	0	200	7	3	61	0	106	1.62	40.39	0	0	0	117	145	90	1	0	0	0	0		233.2	196.22	0	36.3	137.33	0	0	0	0	0	0	8.32	0	1	6	0	0	134.44
2	61.78	0	0	30	4	4	54	1	94	1.5	41.78	0	0	0	116	145	95				1	0		248.4	215.04	0	33.8	151.59	0	0	0	0	0	0	8.32	1	1		1	0	112.24
2	55.99	0	0	30	7	3	68	0	82	1.62	31.25	0	0	0	98	126	84	0	0	1	0	0		232.46	180.19	0	74.8	121.62	1	1	0	0	0	0	6.8	1	1	8.9	0	0	187.19
2	55.6	0	0	30	7	3	69	0	89	1.58	35.65	0	0	0	113	140	90		1	0	0	0		147.62	135.19	1	40.3	80.28	1	1	1	1	1	0	7.9	1	1		1	0	115.93
2	58.4	0	0	30	7	3	62	0	64.5	1.59	25.51	1	0	0	81	118	78	0	0	1	0	0		132.68	140.3	1	53.9	70.72	1	1	1	1	1	1	4.5	1	1		2	1	89.75
2	55.73	0	0	50	7	3	67	0	97	1.58	38.86	0	0	0	106	140	90		1	0	0	0		259.94	163.64	0	40	182.41	0	1	0	0	0	0	7.7	1	1		1	0	111.92
2	56.92	0	1	10	6	3	64	0	63	1.52	27.27	1	0	0	88	130	80				2	1		151.15	122.49	1	72.3	98.7	1	1	1	1	1	0	4.8	1	1		1	0	101.79
2	57.32	0	1	20	6	3	63	0	68.5	1.48	31.27	0	0	0	99	120	80				2	1		210.16	158.09	0	46	132.54	0	1	0	0	0	1	5.5	0	1		2	1	91.63
2	52.68	0	0	450	8	3	75	0	82	1.6	32.03	0	0	0	96	124	83	0	0	1	0	0		245.09	76.99	1	75.2	154.49	0	1	1	0	0	0	7.2	1	1		1	0	111.4
2	53.06	0	1	21	6	3	74	0	60	1.6	23.44	2	1	1	72	130	80				2	1		181.41	138.88	1	44.7	108.93	1	1	1	1	1	1	4.44	1	1		1	0	113.57
2	55.34	0	0	50	7	3	68	0	78	1.68	27.64	1	0	0	89	125	83	0	0	1	0	0		240.19	262.22	0	47.7	140.05	0	1	0	0	0	0	7.7	0	0	15.7	0	0	266.3
2	57.86	0	0	30	7	3	60	0	88	1.56	36.16	0	0	0	104	120	80				2	1		304.63	152.43	0	54.7	149.44	0	1	0	0	0	1	5.7	1	1		2	1	95.64
2	54.7	0	0	30	7	3	68	0	82	1.6	32.03	0	0	0	89	123	83	0	0	1	0	0		210.47	122.57	1	36	126.46	1	0	1	0	0	0	7.6	1	1		1	0	117.51
2	53.94	0	1	20	6	3	70	0	77	1.65	28.28	1	0	0	89	128	84	0	0	1	0	0		205.33	153.73	0	62.6	172.28	0	1	0	0	0	0	6.66	1	1	6	0	0	126.87
2	55.48	0	0	30	7	3	66	0	72	1.61	27.78	1	0	0	90	140	90				1	0		253.31	266.42	0	55.1	144.93	0	1	0	0	0	0	7.2	1	1		1	0	121.23
2	57.61	0	0	30	7	3	59	1	90	1.65	33.06	0	0	0	101	125	80				2	1		222.76	268.93	0	41	127.97	1	1	0	0	0	0	6.9	0	1		2	1	84.4
2	61.37	0	0	30	4	4	50	1	81	1.6	31.64	0	0	0	101	145	90				1	0		197.72	329.39	1	31.8	120.04	1	0	0	1	0	1	6.8	1	1		2	1	81.74
2	51.85	0	0	350	8	3	74	0	78	1.58	31.24	0	0	0	87	150	90	1	0	0	0	0		242.95	172.61	0	39.5	149.13	0	0	0	0	0	1	7.1	1	1	11.3	0	0	202.3
2	57.36	0	1	20	6	3	58	1	70.5	1.56	28.97	1	0	0	96	130	80				2	1		390.6	308.22	0	66	162.33	0	1	0	0	0	1	4.2	1	1		2	1	72.52
2	57.76	0	1	20	6	3	57	1	68	1.64	25.28	1	0	0	85	110	80				2	1		197.78	120.1	1	56	98.3	1	1	1	1	1	1	4.1	1	1		1	0	101.81
2	57.76	0	0	30	7	3	57	1	84.5	1.58	33.85	0	0	0	100	120	70				2	1		224.95	180.05	0	54.8	134.14	0	1	0	0	0	0	6.88	1	1		1	0	109.27
2	62.84	0	0	30	4	4	65	0	84	1.58	33.65	0	0	0	106	145	90		1	0	0	0		248.75	235.85	0	38.7	162.88	0	0	0	0	0	0	7.7	1	1	6.3	0	0	130.68
2	56.96	0	0	30	7	3	59	1	82	1.61	31.63	0	0	0	101	140	90		1	0	0	0		212.3	166.43	0	34.7	136.96	0	0	0	0	0	0	7.23	1	1		2	1	88.24
2	56.16	0	1	20	6	3	61	0	64	1.51	28.07	1	0	0	88	120	80				2	1		247.44	191.91	0	47.7	122.2	1	1	0	0	0	1	5.4	1	1		1	0	104.25
2	56.16	0	0	50	7	3	61	0	82	1.57	33.27	0	0	0	106	140	90				1	0		320.13	332.25	0	39.7	133.98	0	0	0	0	0	0	7.2	1	1		1	0	115.27
2	54.99	0	0	30	7	3	64	0	87	1.7	30.1	0	0	0	95	122	82	0	0	1	0	0		206.66	230.39	0	78.8	131.74	0	1	0	0	0	0	6.6	1	1		1	0	107.24
2	53.85	0	0	50	7	3	67	0	74	1.57	30.02	0	0	0	91	140	90		1	0	0	0		182.3	110.2	1	44.2	107.2	1	1	1	1	1	1	4.9	1	1		2	1	81.71
2	55.38	0	0	50	7	3	63	0	88	1.58	35.25	0	0	0	103	170	90		1	0	0	0		235.04	172.91	0	38.3	157.46	0	0	0	0	0	0	7.77	1	1	13.1	0	0	244.6
2	53.47	0	0	50	7	3	68	0	83	1.6	32.42	0	0	0	101	150	100		1	0	0	0		282.56	208.13	0	67.9	133.3	0	1	0	0	0	0	7.23	1	1		1	0	116.74
2	55.77	0	0	30	7	3	62	0	78	1.6	30.47	0	0	0	93	120	90				2	1		257.9	163.17	0	33.8	142.2	0	0	0	0	0	0	7.23	1	1	6.9	0	0	135.16
2	53.85	0	0	50	7	3	67	0	74	1.56	30.41	0	0	0	91	140	90		1	0	0	0		179.2	107.92	1	47.4	110.22	1	1	1	1	1	1	5.9	0	1		2	1	81.71
2	52.87	0	0	50	7	3	68	0	80	1.52	34.63	0	0	0	106	150	90				1	0		184.5	180.9	1	34.6	103.72	1	0	0	1	0	0	7.6	1	1	7.7	1	0	123.47
2	52.87	0	0	150	7	3	68	0	77.5	1.57	31.44	0	0	0	90	140	90		1	0	0	0		308.79	173.42	0	30.2	154.11	0	0	0	0	0	0	7.2	1	1	9.2	0	0	212.14
2	55.93	0	0	50	7	3	60	0	76	1.52	32.89	0	0	0	93	140	90				1	0		299.3	244.3	0	52.3	166.3	0	1	0	0	0	1	5.9	1	0		1	0	110.2
2	57.69	0	1	10	6	3	54	1	76	1.54	32.05	0	0	0	93	110	80				2	1		293.69	264.82	0	51	149.84	0	1	0	0	0	1	4.4	1	1		2	1	73.66
2	59.75	0	0	30	7	3	49	1	77	1.56	31.64	0	0	0	102	145	90	1	0	0	0	0		230.78	354.49	0	44.1	115.78	1	1	0	0	0	0	6.7	0	1	6.2	0	0	126.68
2	57.28	0	1	20	6	3	55	1	80	1.69	28.01	1	0	0	93	120	80				2	1		269.84	124.99	1	45.9	108.94	1	1	1	0	0	1	5.7	0	1		2	1	99.39
2	56.49	0	1	20	6	3	57	1	61	1.55	25.39	1	0	0	87	110	70				2	1		333	208.29	0	53.5	137.84	0	1	0	0	0	1	4.22	1	1		2	1	70.01
2	56.09	0	0	30	7	3	58	1	88	1.59	34.81	0	0	0	98	130	80				2	1		287.21	317.16	0	36.9	106.88	1	0	0	0	0	0	6.22	1	1		1	0	104.53
2	51.92	0	0	150	7	3	69	0	94	1.7	32.53	0	0	0	98	140	90				1	0		313.3	315.99	0	30.1	180	0	0	0	0	0	0	7.1	1	1		1	0	125.88
2	53.4	0	0	30	7	3	65	0	76	1.55	31.63	0	0	0	96	140	90		1	0	0	0		251.92	308.75	0	39.1	121.07	1	0	0	0	0	0	7.66	0	1	7.7	0	0	187.61
2	53.77	0	1	10	6	3	64	0	62.8	1.58	25.16	1	0	0	81	110	90				2	1		187.2	142.1	1	51.5	76.9	1	1	1	1	1	1	4.2	1	1		2	1	90.42
2	50.48	0	0	50	7	3	73	0	92	1.74	30.39	0	0	0	102	123	82	0	0	1	0	0		212.2	154.61	0	48.8	102.41	1	1	0	0	0	1	6.7	0	1	11.9	0	0	187.83
2	57.86	0	0	30	7	3	52	1	81	1.58	32.45	0	0	0	98	119	79	0	0	1	0	0		272.47	183.56	0	60.2	175.56	0	1	0	0	0	0	7.3	1	1	8.3	0	0	277.2
2	55.86	0	0	50	7	3	57	1	72.5	1.58	29.04	1	0	0	97	123	82	0	0	1	0	0		251.2	228.46	0	44	161.51	0	1	0	0	0	0	7.2	0	1	7.3	0	0	264.92
2	55.47	0	0	30	7	3	58	1	77.5	1.58	31.04	0	0	0	92	155	90		1	0	0	0		266.2	159.98	0	39	134.2	0	0	0	0	0	0	7.44	0	1	12.6	0	0	206.73
2	59.51	0	1	10	6	3	48	1	70.5	1.52	30.51	0	0	0	98	130	80				2	1		244.96	98.18	1	55	117.22	1	1	1	0	0	0	6.77	0	1		2	1	88
2	57.86	0	0	30	7	3	52	1	77	1.47	35.63	0	0	0	107	120	73	0	0	1	0	0		204	198.3	0	35.3	119.04	1	0	0	0	0	0	7.32	1	1		2	1	74
2	54.7	0	0	150	7	3	60	0	83	1.62	31.63	0	0	0	97	145	90		1	0	0	0		313.4	327.73	0	34.33	142.2	0	0	0	0	0	0	6.6	1	1	11.9	0	0	257.4
2	55.47	0	1	20	6	3	58	1	88	1.68	31.18	0	0	0	98	140	90		1	0	0	0		160.67	341.35	1	63.2	89.2	1	1	0	1	0	1	3.7	0	1		2	1	98.73
2	57.86	0	0	30	7	3	52	1	81	1.58	32.45	0	0	0	98	163	90		1	0	0	0		272.47	183.56	0	60.2	175.56	0	1	0	0	0	0	7.3	1	1	8.3	0	0	277.2
2	58.68	0	1	10	6	3	50	1	105	1.83	31.35	0	0	0	101	120	80				2	1		264	394	0	31	154.2	0	0	0	0	0	0	6.9	1	1		2	1	80
2	56.26	0	0	30	7	3	56	1	106.5	1.77	33.99	0	0	0	107	130	84				2	1		241	193	0	41	161.4	0	1	0	0	0	0	6.6	1	1		2	1	92
2	54.7	0	0	30	7	3	60	0	88	1.67	31.55	0	0	0	99	140	90				1	0		221.2	194.22	0	57	85.15	1	1	0	0	0	1	7.3	0	0		1	0	111.2
2	68.01	0	0	30	4	4	69	1	98	1.74	30.22	0	0	0	99	130	80				2	1		190	138.68	1	42	110.26	1	1	1	1	1	0	7.1	1	0		1	0	100
2	59.93	0	0	30	7	3	57	1	95	1.75	31.02	0	0	0	103	122	81	0	0	1	0	0		292	202.6	0	38.6	132.32	0	0	0	0	0	0	7.3	0	0	7.1	0	0	143
2	51.71	0	0	57	7	3	68	0	77	1.6	30.08	0	0	0	97	129	83	0	0	1	0	0		218.2	224.52	0	25	106.99	1	0	0	0	0	0	6.8	0	1	10.2	0	0	214.3
2	53.18	0	0	200	7	3	64	0	77	1.57	31.24	0	0	0	101	165	90	1	0	0	0	0		286.73	182.9	0	50	145.6	0	1	0	0	0	0	7.3	1	1	15.7	0	0	219.38
2	50.63	0	0	150	7	3	71	0	77	1.6	30.08	0	0	0	100	140	90	1	0	0	0	0		259.09	341.77	0	57.4	133.34	0	1	0	0	0	1	5.6	0	1	12.66	0	0	261.6
2	51.35	0	0	140	7	3	69	0	78	1.6	30.47	0	0	0	92	145	90	1	0	0	0	0		204.09	233.96	0	39	128.6	1	0	0	0	0	0	6.7	0	1	9.4	0	0	153.5
2	50.28	0	0	300	7	3	72	0	76	1.54	32.05	0	0	0	97	120	80				2	1		238.53	268.42	0	62.8	122.05	1	1	0	0	0	0	6.8	1	1	7.11	0	0	146.81
2	50.99	0	0	30	7	3	70	0	80	1.58	32.05	0	0	0	103	121	82	0	0	1	0	0		255.2	160.33	0	39	134.1	0	0	0	0	0	0	7.3	1	1		1	0	106.99
2	53.18	0	0	150	7	3	64	0	88	1.64	32.72	0	0	0	99	126	79	0	0	1	0	0		265.05	147.35	1	61.7	133.77	0	1	1	0	0	0	7.4	1	1	11.3	0	0	264.4
2	51.71	0	0	350	8	3	68	0	78	1.59	30.85	0	0	0	92	155	90	1	0	0	0	0		275.45	266.77	0	37	145.12	0	0	0	0	0	0	7.3	1	1	13.4	0	0	254.4
2	52.44	0	0	310	8	3	66	0	56	1.48	25.57	1	0	0	83	140	90	1	0	0	0	0		214.89	229.6	0	45.7	103.97	1	1	0	0	0	0	6.6	1	1	7.22	0	0	159.82
2	52.44	0	0	150	7	3	66	0	77	1.6	30.08	0	0	0	100	160	90		1	0	0	0		259.09	341.77	0	37.4	133.34	0	0	0	0	0	1	5.6	0	1	13.2	0	0	261.6
2	51.35	0	0	140	7	3	69	0	78	1.6	30.47	0	0	0	92	145	90		1	0	0	0		204.09	233.96	0	39	128.6	1	0	0	0	0	1	5.7	0	1	9.4	0	0	153.5
2	56.83	0	1	10	6	3	53	1	69	1.63	25.97	1	0	0	85	110	70				2	1		259.46	207.84	0	67.5	150.39	0	1	0	0	0	1	4.5	0	1		2	1	93.78
2	54.49	0	0	30	7	3	59	1	78	1.58	31.24	0	0	0	101	122	84	0	0	1	0	0		266.88	140.45	1	48.5	190.29	0	1	1	0	0	0	7.3	1	1	7	0	0	137.28
2	55.26	0	0	30	7	3	57	1	84	1.65	30.85	0	0	0	99	180	90		1	0	0	0		223.2	188.2	0	42	133.71	0	1	0	0	0	0	7.32	1	0		1	0	118.3
2	54.49	0	0	30	7	3	59	1	85	1.69	29.76	1	0	0	102	122	82	0	0	1	0	0		310.71	359.4	0	36	142.83	0	0	0	0	0	1	7.2	0	1		1	0	119.2
2	47.01	0	0	206	7	3	80	0	73	1.58	29.24	1	0	0	88	140	90	1	0	0	0	0		251.54	243.03	0	66.7	136.23	0	1	0	0	0	0	6.8	1	1	11.6	0	0	171.1
2	53.15	0	0	310	8	3	61	0	93	1.52	40.25	0	0	0	112	155	90		1	0	0	0		321.59	211.73	0	65.5	144.33	0	1	0	0	0	0	7.55	0	0	8.8	0	0	166.58
2	53.15	0	1	20	6	3	61	0	57.5	1.6	22.46	2	1	1	74	120	80				2	1		193.22	143.38	1	69.4	83.12	1	1	1	1	1	1	4.6	1	1		2	1	97.3
2	51.67	0	0	30	7	3	65	0	86	1.6	33.59	0	0	0	89	145	90	1	0	0	0	0		274.09	260.44	0	56.9	165.1	0	1	0	0	0	0	6.9	1	1		1	0	114.27
2	55.43	0	1	20	6	3	55	1	78.5	1.64	29.19	1	0	0	96	120	80				2	1		344.9	271.11	0	55.3	145.88	0	1	0	0	0	0	7.55	1	1		1	0	116.83
2	52.95	0	1	20	6	3	60	0	77	1.6	30.08	0	0	0	92	123	79	0	0	1	0	0		296.18	266.99	0	38	124.78	1	0	0	0	0	1	5.77	0	1	5.88	0	0	130.48
2	51.48	0	1	10	6	3	64	0	84	1.66	30.48	0	0	0	98	119	81	0	0	1	0	0		241.27	144.36	1	65.7	146.7	0	1	1	0	0	0	7.8	0	1		1	0	111.2
2	48.33	0	0	30	7	3	73	0	72	1.54	30.36	0	0	0	98	121	83	0	0	1	0	0		229.73	153.25	0	66.9	132.18	0	1	0	0	0	0	6.6	0	1		1	0	108.65
2	52.76	0	0	50	7	3	59	1	70	1.65	25.71	1	0	0	85	140	90		1	0	0	0		206.35	76.62	1	50.9	140.13	0	1	1	0	0	1	4.62	1	1		2	1	87.48
2	53.13	0	0	50	7	3	58	1	64	1.52	27.7	1	0	0	93	120	70				2	1		205.3	188.3	0	57.8	133.2	0	1	0	0	0	1	5.6	1	0		1	0	107.05
2	51.84	0	0	30	7	3	60	0	58	1.52	25.1	1	0	0	81	110	70				2	1		277.31	155.35	0	46.2	160.04	0	1	0	0	0	1	4.5	1	1		2	1	89.84
2	51.84	0	0	30	7	3	60	0	77.3	1.58	30.96	0	0	0	88	145	90		1	0	0	0		254.11	211.84	0	73.3	121.77	1	1	0	0	0	0	7.3	1	1	7	0	0	148.06
2	52.57	0	1	20	6	3	58	1	82	1.65	30.12	0	0	0	93	124	82	0	0	1	0	0		275.81	185.69	0	60.5	158.2	0	1	0	0	0	0	6.6	1	1		1	0	114.57
2	52.2	0	1	10	6	3	59	1	70	1.72	23.66	2	1	1	71	120	70				2	1		199.3	150.42	1	43.2	144.3	0	1	0	1	0	1	5.2	0	1	7	1	0	105.32
2	52.2	0	0	30	7	3	59	1	87	1.65	31.96	0	0	0	103	130	82	0	0	1	0	0		188.3	149.2	1	44.4	166.2	0	1	1	1	0	0	7.3	1	1	7	1	0	105.32
2	49.7	0	0	50	7	3	66	0	72.5	1.55	30.18	0	0	0	88	145	100		1	0	0	0		250.34	244.7	0	74.5	126.9	1	1	0	0	0	0	7.5	0	1	7.7	0	0	136.22
2	46.65	0	0	30	7	3	75	0	67	1.62	25.53	1	0	0	86	130	80				2	1		292.51	182.84	0	60.1	195.84	0	1	0	0	0	1	5.7	0	1	6.6	0	0	127.93
2	45.68	0	0	200	7	3	78	0	71.5	1.53	30.54	0	0	0	96	140	90				1	0		214.41	204.58	0	63.3	110.19	1	1	0	0	0	0	6.82	1	1		2	1	98.32
2	50.94	0	0	30	7	3	61	0	85	1.6	33.2	0	0	0	103	122	82	0	0	1	0	0		219.32	72.1	1	41.1	133.2	0	1	1	0	0	0	7.1	1	1		2	1	93.6
2	48.49	0	0	30	7	3	68	0	77.5	1.65	28.47	1	0	0	89	119	82	0	0	1	0	0		239.21	153.13	0	56.2	152.38	0	1	0	0	0	1	5.1	0	1		2	1	92.69
2	50.23	0	1	10	6	3	63	0	60	1.64	22.31	2	1	1	72	120	80				2	1		146.98	66.87	1	52.8	100.81	1	1	1	1	1	1	4.5	1	1		2	1	88.59
2	44.57	0	0	50	10	2	80	0	88	1.6	34.37	0	0	1	92	140	90		1	0	0	0		188.3	126.07	1	44.3	89.3	1	1	1	1	1	1	7.2	1	1		2	1	97.28
2	51.85	0	1	10	6	3	57	1	74	1.59	29.27	1	0	0	96	110	70				2	1		274.36	170.22	0	50.1	144.3	0	1	0	0	0	0	6.89	1	1	6	0	0	126.84
2	50.41	0	1	20	6	3	61	0	80	1.54	33.73	0	0	0	98	123	78	0	0	1	0	0		277.1	123.87	1	53.1	139.32	0	1	1	0	0	1	5.23	0	0		2	1	75.31
2	49.36	0	0	30	7	3	64	0	99	1.58	39.66	0	0	0	112	125	82	0	0	1	0	0		271.35	200.05	0	52	179.34	0	1	0	0	0	0	7.93	1	1		1	0	108.47
2	47.99	0	0	200	7	3	68	0	73	1.55	30.39	0	0	0	93	130	85				2	1		283.31	172.84	0	37.3	141.44	0	0	0	0	0	1	6.2	1		6.9	0	0	149.6
2	47.99	0	0	400	8	3	68	0	82	1.61	31.63	0	0	0	86	150	90		1	0	0	0		301.33	155.84	0	34.1	146.66	0	0	0	0	0	1	5.6	0	1		1	0	115.3
2	44.11	0	0	30	10	2	80	0	58	1.62	22.1	2	1	1	70	110	70				2	1		220.64	215.73	0	42.5	134.99	0	1	0	0	0	1	5.62	0	1		2	1	87.82
2	48.17	0	0	400	8	3	66	0	86.5	1.6	33.79	0	0	0	105	140	90	1	0	0	0	0		393.17	382.96	0	39.3	147.58	0	0	0	0	0	0	7.2	0	1	7	0	0	145.5
2	47.17	0	0	400	8	3	69	0	72	1.54	30.36	0	0	0	90	122	83	0	0	1	0	0		316.92	210.34	0	70.8	154.05	0	1	0	0	0	0	6.1	0	1	7.7	0	0	155.65
2	45.72	0	0	289	7	3	72	0	87.4	1.61	33.72	0	0	0	94	118	86	0	0	1	0	0		225.1	190.14	0	43	166.3	0	1	0	0	0	0	7.1	1	1	9.6	0	0	205.27
2	47.35	0	0	50	7	3	67	0	97.5	1.66	35.38	0	0	0	112	140	90		1	0	0	0		212.3	215.33	0	33.4	135.83	0	0	0	0	0	0	7.34	1	1	9.3	0	0	233.3
2	49.93	0	0	30	7	3	58	1	78.5	1.6	30.66	0	0	0	96	140	90				1	0		338	169	0	43	111.2	1	1	0	0	0	1	7.9	1	1		1	0	109.3
2	52.82	0	0	30	7	3	50	1	79	1.69	27.66	1	0	0	96	140	90				1	0		338	169	0	36	118.2	1	0	0	0	0	0	7.22	0	0		2	1	77
2	49.59	0	1	20	6	3	59	1	80	1.74	26.42	1	0	0	94	120	80				2	1		243	188.66	0	43.8	131.27	0	1	0	0	0	1	4.1	1	1		2	1	76
2	46.88	0	0	188	7	3	67	0	85	1.55	35.38	0	0	0	105	140	90	1	0	0	0	0		233.63	167.16	0	55.5	144.7	0	1	0	0	0	0	7.3	1	1	13.1	0	0	242.3
2	42.78	0	0	80	10	2	80	0	72.5	1.54	30.57	0	0	0	98	121	83	0	0	1	0	0		260.54	277.26	0	54	151.09	0	1	0	0	0	0	7.4	1	1	10.5	0	0	220.61
2	47.21	0	0	300	7	3	66	0	80	1.6	31.25	0	0	0	101	122	81	0	0	1	0	0		289.3	188.3	0	39	136.34	0	0	0	0	0	0	7.7	1	1	15.4	0	0	231.6
2	46.55	0	0	30	7	3	68	0	77	1.55	32.05	0	0	0	99	125	83	0	0	1	0	0		233.2	350.4	0	54.2	156.2	0	1	0	0	0	0	7.3	1	1	12.33	0	0	284.2
2	46.22	0	0	100	7	3	69	0	70	1.58	28.04	1	0	0	93	122	82	0	0	1	0	0		204	188.3	0	44.3	122.04	1	1	0	0	0	0	7.83	1	1	11.2	0	0	238
2	45.9	0	0	150	7	3	70	0	74.5	1.52	32.25	0	0	0	98	140	90		1	0	0	0		233.2	231.45	0	39.9	119.2	1	0	0	0	0	0	7.9	1	1		1	0	106.72
2	46.22	0	0	200	7	3	69	0	79	1.51	34.65	0	0	0	112	140	90	1	0	0	0	0		263.88	166.16	0	38.4	172.35	0	0	0	0	0	0	7.82	1	1	7.5	0	0	295.57
2	48.41	0	0	30	7	3	61	0	104	1.72	35.15	0	0	0	116	140	90	1	0	0	0	0		177.41	121.4	1	33	120.13	1	0	1	1	0	0	7.32	1	1		2	1	87.04
2	47.06	0	0	30	7	3	65	0	76	1.55	31.63	0	0	0	103	145	100	1	0	0	0	0		309.74	330.26	0	57.2	186.49	0	1	0	0	0	0	6.8	0	0	6.8	0	0	138.11
2	41.94	0	0	350	11	2	80	0	78	1.6	30.47	0	0	0	103	140	90				1	0		213.44	209.85	0	69.2	102.27	1	1	0	0	0	0	7.2	1	1		1	0	116.53
2	51.78	0	0	55	7	3	50	1	77	1.52	33.33	0	0	0	106	145	95		1	0	0	0		294.74	212.16	0	60.8	191.51	0	1	0	0	0	0	7.3	0	1	10	0	0	258.23
2	50.7	0	0	30	7	3	53	1	84	1.65	30.85	0	0	0	93	100	70				2	1		260.54	197.78	0	48.8	142.18	0	1	0	0	0	0	6.8	0	1		1	0	111.41
2	43.74	0	0	30	10	2	74	0	78	1.52	33.76	0	0	0	103	140	100	1	0	0	0	0		212.33	188.55	0	38.44	136.18	0	0	0	0	0	0	7.32	1	1		1	0	104.33
2	47.26	0	0	30	7	3	63	0	88	1.62	33.53	0	0	0	101	145	95	1	0	0	0	0		287.52	141.17	1	37.8	181.49	0	0	1	0	0	0	8.2	1	1	9.33	0	0	280.2
2	44.67	0	0	50	7	2	71	0	84	1.66	30.48	0	0	0	90	126	83	0	0	1	0	0		315.2	357.1	0	53.8	162.3	0	1	0	0	0	0	7.3	0	1	6.6	0	0	138
2	46.6	0	0	50	7	3	65	0	82	1.62	31.25	0	0	0	103	140	90	1	0	0	0	0		212.88	158.07	0	30.9	131.27	0	0	0	0	0	0	7.32	1	0	9.2	0	0	162.3
2	48.13	0	0	30	7	3	59	1	60	1.6	23.44	2	1	1	73	120	85				2	1		213.3	163	0	52	118.3	1	1	0	0	0	1	5.2	0	1	8.8	0	0	188.3
2	47.79	0	0	50	7	3	60	0	78	1.45	37.1	0	0	0	101	110	71	0	0	1	0	0		332.08	249.89	0	68.8	163.7	0	1	0	0	0	0	7.1	1	1		1	0	125.01
2	47.46	0	0	400	8	3	61	0	79	1.6	30.86	0	0	0	92	140	90				1	0		212.37	170.66	0	37.8	121.24	1	0	0	0	0	0	7.52	1	1		1	0	121.35
2	48.13	0	0	30	7	3	59	1	60	1.55	24.97	2	1	1	72	120	85	0	0	1	0	0		231.2	188.3	0	70	139.06	0	1	0	0	0	1	5.2	0	1	9.2	0	0	188.3
2	45.18	0	0	30	7	3	68	0	60	1.49	27.03	1	0	0	88	130	80	0	0	1	0	0		326.21	211.58	0	60.2	142.2	0	1	0	0	0	0	6.6	1	1		0	0	166.11
2	42.67	0	0	100	10	2	72	0	85.5	1.64	31.79	0	0	0	103	140	90	1	0	0	0	0		209.87	141.33	1	45.3	136.3	0	1	1	0	0	0	7.33	1	1		1	0	112.92
2	44.7	0	0	30	10	2	64	0	95	1.64	35.32	0	0	0	103	122	82	0	0	1	0	0		222.32	195.06	0	32.7	150.61	0	0	0	0	0	0	7.2	0	1		1	0	102.94
2	39.2	0	0	210	10	2	80	0	75	1.56	30.82	0	0	0	92	140	90	1	0	0	0	0		272.8	302.7	0	57.3	154.96	0	1	0	0	0	0	6.9	1	1		1	0	102.19
2	43.15	0	0	100	10	2	65	0	73.9	1.53	31.57	0	0	0	97	110	90				2	1		277.3	166.2	0	35.2	133.3	0	0	0	0	0	0	6.65	0	1		1	0	107.62
2	43.36	0	0	150	10	2	63	0	105	1.75	34.29	0	0	0	119	140	90	1	0	0	0	0		220.22	100.57	1	56.8	143.31	0	1	1	0	0	0	8.3	0	1		1	0	112.3
2	40.7	0	0	100	10	2	72	0	77	1.6	30.08	0	0	0	93	140	90	1	0	0	0	0		246.09	259.39	0	37.6	126.61	1	0	0	0	0	0	6.8	0	1		2	1	82.93
2	41.48	0	0	30	10	2	68	0	84	1.62	32.01	0	0	0	101	160	90	1	0	0	0	0		293.2	233.2	0	36.6	166.3	0	0	0	0	0	1	5.2	1	1	12.3	0	0	257.68
2	43.39	0	0	30	10	2	59	1	86	1.6	33.59	0	0	0	104	122	82	0	0	1	0	0		247.76	199.2	0	42	113.85	1	1	0	0	0	0	7.3	1	1		1	0	119.22
2	36.45	0	0	800	11	2	80	0	82	1.6	32.03	0	1	1	72	155	80	0	0	1	0	0		190.35	159.47	1	32.6	125.86	1	0	0	1	0	0	7.22	1	1		1	0	106.38
2	37.71	0	0	100	10	2	69	0	88	1.6	34.37	0	0	0	93	140	100	1	0	0	0	0		368.42	363.79	0	68	157.66	0	1	0	0	0	0	7.32	1	1	6.92	0	0	147.13
2	36.82	0	0	150	10	2	70	0	88	1.63	33.12	0	0	0	93	155	90	1	0	0	0	0		235.86	273.07	0	54	127.25	1	1	0	0	0	0	7.3	1	1	10.9	0	0	220.12
2	37.34	0	0	30	10	2	68	0	83	1.62	31.63	0	0	0	106	140	90		1	0	0	0		299.3	219.3	0	44	155.3	0	1	0	0	0	0	6.9	1	1		0	0	257.68
2	39.95	0	0	350	11	2	56	1	76	1.59	30.06	0	0	0	89	140	90		1	0	0	0		262.98	208.48	0	34.6	156.68	0	0	0	0	0	0	6.99	1	1		1	0	124.75
2	33.71	0	0	145	10	2	79	0	80	1.65	29.38	1	1	1	73	155	95				1	0		130.01	74.84	1	47.6	77.44	1	1	1	1	1	1	5.2	0	1	5.2	2	1	92.57
2	37.94	0	0	200	10	2	61	0	77.6	1.58	31.08	0	0	0	93	140	90		1	0	0	0		284.81	394.54	0	37.6	154.33	0	0	0	0	0	0	6.8	0	1	7.2	0	0	166.98
2	34.31	0	0	50	10	2	73	0	88	1.63	33.12	0	0	0	115	140	90	1	0	0	0	0		312.95	311.34	0	37.6	133.08	0	0	0	0	0	0	8.32	1	1	16.6	0	0	288.3
2	35.79	0	0	30	10	2	67	0	82	1.62	31.25	0	0	0	103	155	90	1	0	0	0	0		324.44	317.6	0	56	144.3	0	1	0	0	0	1	4.8	1	1	13.2	0	0	257.68
2	33.98	0	0	55	10	2	71	0	84	1.62	32.01	0	0	0	103	140	90	1	0	0	0	0		255.57	148.71	1	61.4	134.43	0	1	1	0	0	0	8.55	1	1	6	0	0	136.68
2	37.72	0	0	30	10	2	55	1	90	1.7	31.14	0	0	0	99	121	82	0	0	1	0	0		244.3	168.32	0	52.2	109.5	1	1	0	0	0	0	7.3	0	0		1	0	119.23
2	33.63	0	0	50	10	2	68	0	77	1.6	30.08	0	0	0	88	110	70				1	0		221.55	237.92	0	51.4	122.57	1	1	0	0	0	0	6.2	1	1		2	1	97.9
2	33.63	0	0	300	10	2	68	0	73.5	1.52	31.81	0	0	0	102	140	90		1	0	0	0		233.2	163.3	0	35.1	135.2	0	0	0	0	0	0	6.99	0	0	7.72	0	0	160
2	30.04	0	0	30	10	2	83	0	81	1.7	28.03	1	0	0	87	175	70				1	0		198.3	144.3	1	37.3	118.3	1	0	1	1	0	1	7.1	1	1		1	0	100.08
2	30.9	0	0	30	10	2	79	0	79	1.76	25.5	1	0	0	87	150	100		1	0	0	0		196	117.21	1	39.1	143.46	0	0	1	1	0	1	5.1	1	1		1	0	100.08
2	31.43	0	0	300	10	2	66	0	72.3	1.54	30.49	0	0	0	90	145	90	1	0	0	0	0		259.34	153.48	0	57.7	130.94	0	1	0	0	0	0	7.33	0	1	9.2	0	0	182.97
2	29.29	0	0	200	10	2	74	0	73	1.55	30.39	0	0	0	95	140	90	1	0	0	0	0		275.69	194.85	0	30.2	136.22	0	0	0	0	0	0	7.52	1	1	6.6	1	0	107.2
2	30.76	0	0	400	11	2	64	0	78.3	1.58	31.37	0	0	0	83	140	90	1	0	0	0	0		269.3	180.5	0	32.3	148.32	0	0	0	0	0	0	7.3	1	1	10.6	0	0	169.77
2	28.48	0	0	235	13	1	73	0	82	1.63	30.86	0	0	0	98	140	95	1	0	0	0	0		213.33	199.3	0	41	119.96	1	1	0	0	0	0	7.2	0	1	10.3	0	0	268.34
2	29.67	0	0	300	13	1	53	1	92	1.54	38.79	0	0	0	112	140	90	1	0	0	0	0		198.3	189.55	1	32.3	118.09	1	0	0	1	0	0	8.23	0	1		1	0	118.4
2	28.45	0	0	30	13	1	59	1	94.5	1.7	32.7	0	0	0	103	140	95	1	0	0	0	0		277	355.22	0	40	145.9	0	1	0	0	0	0	7.2	0	0	6.2	0	0	130
2	25.09	0	0	250	13	1	76	0	78	1.6	30.47	0	0	0	88	155	94	1	0	0	0	0		347.56	390.05	0	37	155.22	0	0	0	0	0	1	5.66	1	1		2	1	77.55
2	26.23	0	0	200	13	1	67	0	86.5	1.62	32.96	0	0	0	101	140	90	1	0	0	0	0		358.98	366.88	0	33.1	142.5	0	0	0	0	0	0	7.33	1	1	11.1	0	0	255.7
2	23.49	0	0	30	13	1	65	0	84	1.63	31.62	0	0	0	106	145	90	1	0	0	0	0		272.17	323.61	0	34.6	152.66	0	0	0	0	0	0	7.8	0	1	7.2	0	0	169.72
2	22.06	0	0	1000	14	1	70	0	85	1.66	30.85	0	0	0	92	145	90				1	0		266.3	260.57	0	38.1	140.2	0	0	0	0	0	0	7.1	1	1		1	0	124.89
2	20.62	0	0	300	14	1	69	0	77	1.59	30.46	0	0	0	96	140	90		1	0	0	0		188.3	155.7	1	38.7	159.42	0	0	0	1	0	1	5.1	1	1	6.6	0	0	135.33
2	20.1	0	0	300	14	1	69	0	77	1.59	30.46	0	0	0	96	140	90		1	0	0	0		178.3	141.45	1	58.7	89.32	1	1	1	1	1	1	5.1	0	1	6.6	0	0	135.33
2	17.04	0	0	500	14	1	78	0	93	1.67	33.35	0	0	0	102	160	95	1	0	0	0	0		213.2	177.5	0	59.7	133.2	0	1	0	0	0	0	6.9	1	1	12.3	0	0	255.55
2	16.32	0	0	600	14	1	72	0	75	1.58	30.04	0	0	0	96	150	90	1	0	0	0	0		222.97	166.8	0	42	152.68	0	1	0	0	0	0	7.2	1	0	11.8	0	0	289.75
2	15.8	0	0	450	14	1	76	0	95	1.7	32.87	0	0	0	99	145	95		1	0	0	0		243.2	182.3	0	39.7	132.2	0	0	0	0	0	1	7.2	1	1	14.33	0	0	233.2
2	15.1	0	0	350	14	1	80	0	90	1.65	33.06	0	0	0	106	140	95		1	0	0	0		202.3	161.27	0	59.7	111.79	1	1	0	0	0	1	5.8	1	1	12.2	0	0	242.3
2	11.09	0	0	450	17	0	65	0	77	1.54	32.47	0	0	0	96	140	90	1	0	0	0	0		233.3	155.2	0	35.3	113.98	1	0	0	0	0	0	7.32	1	0	9.3	1	0	115.7
2	10.03	0	0	900	17	0	61	0	72	1.58	28.84	1	0	0	96	140	90	1	0	0	0	0		73.49	134.19	1	43.1	103.55	1	1	1	1	1	0	7.32	1	1	6.6	0	0	133.23
2	8.45	0	0	1800	17	0	68	0	82	1.62	31.25	0	0	0	90	150	95		1	0	0	0		234.61	202.85	0	36.8	112.2	1	0	0	0	0	0	7.5	1	1	8.32	0	0	145.32
2	8.29	0	0	1000	17	0	68	0	79	1.6	30.86	0	0	0	98	150	90		1	0	0	0		285.89	355.65	0	35.8	148.86	0	0	0	0	0	0	7.33	1	1	11.2	0	0	220.95
2	5.14	0	0	1800	17	0	72	0	84	1.59	33.23	0	0	0	82	172	95		1	0	0	0		228.24	100.8	1	49.5	108.2	1	1	1	0	0	0	6.99	1	1		1	0	107.43
1	89.4	0	0	60	4	5	65	0	89	1.66	32.3	1	0	0	92	140	90				1	0		166	174.36	1	57	94.13	1	1	0	1	0	1	6.6	0	0		1	0	108
1	88.5	0	0	30	4	5	67	0	88	1.62	33.53	0	0	0	103	140	90				1	0		173.32	93.81	1	37	117.56	1	0	1	1	0	0	7.1	1	0		2	1	60.6
1	87	0	0	50	4	5	65	0	78	1.6	30.47	0	0	0	99	125	82	0	0	1	0	0		159.18	111.29	1	34	102.92	1	0	1	1	0	0	7.2	1	1	9.8	0	0	269.37
1	87.5	0	0	35	4	5	68	0	81	1.64	30.12	0	0	0	98	127	84	0	0	1	0	0		197	178.3	1	31	80.11	1	0	0	1	0	0	7.1	0	0		2	1	84
1	89.5	0	0	50	4	5	61	0	90	1.71	30.78	0	0	0	96	119	81	0	0	1	0	0		225	240.57	0	41	123.87	1	1	0	0	0	0	7.1	0	0	9	0	0	180
1	91.2	0	0	30	1	5	62	0	85	1.66	30.85	0	0	0	97	140	90				1	0		102	175.28	1	47	89.33	1	1	0	1	0	1	6.88	1	1		1	0	109
1	86.4	0	0	30	4	5	66	0	81	1.6	31.64	0	0	0	101	140	90				1	0		197.72	329.39	1	31.8	120.04	1	0	0	1	0	1	6.8	1	1		2	1	81.74
1	86.8	0	0	30	4	5	69	0	86.5	1.64	32.16	0	0	0	105	150	90				1	0		177.29	124	1	48.9	103.59	1	1	1	1	1	1	6.6	1	1		2	1	96.62
1	88.2	0	0	30	4	5	63	0	88	1.7	30.45	0	0	0	99	122	84	0	0	1	0	0		216	193.33	0	56	162.52	0	1	0	0	0	0	7.2	0	0		1	0	106.7
1	87.5	0	0	30	4	5	68	0	94	1.65	34.53	0	0	0	115	145	90				1	0		198.3	142.13	1	28	109.57	1	0	1	1	0	0	7.9	0	0		1	0	102
1	87.6	0	0	30	4	5	64	0	97.5	1.61	37.61	0	0	0	120	140	90				1	0		193.3	101.7	1	33	119.3	1	0	1	1	0	0	7.32	1	0		1	0	108.3
1	86.8	0	0	30	4	5	69	0	92	1.66	33.39	0	0	0	103	125	84	0	0	1	0	0		224.56	260.65	0	53.5	118.93	1	1	0	0	0	0	7.23	1	1		2	1	95.26
1	85.2	0	0	30	4	5	68	0	100	1.71	34.2	0	0	0	106	145	100				1	0		157	105	1	27	109	1	0	1	1	0	1	5.7	0	0		2	1	82
1	88.8	0	0	30	4	5	62	0	90	1.7	31.14	0	0	0	93	140	80				1	0		194	159	1	37	105.2	1	0	0	1	0	1	7.2	1	1		2	1	86
1	90.2	0	0	70	4	5	67	0	87	1.68	30.82	0	0	0	100	123	82	0	0	1	0	0		211	255.95	0	37	122.81	1	0	0	0	0	0	7.1	1	1		2	1	89
1	87.38	0	0	30	4	4	78	0	60.7	1.66	22.03	2	1	1	80	130	90				2	1		164.36	140.16	1	58	108.33	1	1	1	1	1	1	4.01	1	1		2	1	93.92
1	87.7	0	0	30	4	5	62	0	101	1.71	34.54	0	0	0	101	128	84	0	0	1	0	0		204	232	0	45	112.6	1	1	0	0	0	0	7.32	1	1		2	1	95
1	90.02	0	0	30	1	5	73	0	90	1.8	27.78	1	0	0	92	130	79	0	0	1	0	0		188.3	154.3	1	46.7	110.74	1	1	0	1	0	1	7.3	1	1		2	1	89.3
1	82.5	0	0	40	4	5	67	0	91	1.62	34.67	0	0	0	103	140	90				1	0		272.22	169.4	0	67.3	171.04	0	1	0	0	0	1	5.6	0	0		2	1	81.78
1	84.3	0	0	30	4	5	64	0	86	1.64	31.98	0	0	0	95	140	100				1	0		246.6	291.88	0	49.8	138.42	0	1	0	0	0	0	7.3	1	1	7.9	0	0	127.73
1	96.74	0	0	30	1	5	62	0	82	1.68	29.05	1	0	1	80	122	78	0	0	1	0	0		192.33	146.3	1	61.7	71.98	1	1	1	1	1	1	5.3	1	0		1	0	116.63
1	80.6	0	0	60	4	5	65	0	85	1.69	29.76	1	0	0	98	126	82	0	0	1	0	0		167	101.01	1	41	105.8	1	1	1	1	1	0	7.32	0	0		1	0	106
1	80.6	0	0	30	4	5	65	1	84	1.66	30.48	0	0	0	97	140	100		1	0	0	0		175	196.5	1	38.3	97.4	1	0	0	1	0	0	7.3	1	1		1	0	104
1	82.3	0	0	30	4	5	62	0	86	1.69	30.11	0	0	0	93	128	93	0	0	1	0	0		204	230.11	0	46	111.98	1	1	0	0	0	0	7.88	1	0		2	1	95
1	86.46	0	0	100	4	4	78	0	78	1.69	27.31	1	0	0	94	133	82	0	0	1	0	0		190.14	177.71	1	40.4	114.2	1	1	0	1	0	0	7.2	1	1		1	0	105.8
1	79.6	0	0	30	4	5	65	0	80	1.6	31.25	0	0	0	98	140	90				1	0		255.33	233.94	0	30	145.19	0	0	0	0	0	0	7.2	0	0		1	0	109.33
1	81.3	0	0	30	4	5	62	0	92	1.7	31.33	0	0	0	94	120	70				2	1		202.55	234.22	0	42	113.71	1	1	0	0	0	1	4.4	1	0		2	1	69.46
1	87.5	0	0	30	4	5	68	0	91.3	1.66	32.3	0	0	1	88	150	100		1	0	0	0		247	124.1	1	36	186.18	0	0	1	0	0	0	7.1	0	0		1	0	126
1	90.6	0	0	30	1	5	63	0	83.5	1.68	29.58	1	0	0	98	122	82	0	0	1	0	0		236	205.38	0	41	153.92	0	1	0	0	0	1	8.2	1	0		2	1	94
1	83.3	0	0	160	4	5	69	0	110	1.65	40.4	0	0	0	118	150	90				1	0		186	149.11	1	29	126.18	1	0	1	1	0	0	7.32	1	0		2	1	88
1	89.3	0	0	30	4	5	65	0	86.5	1.59	34.22	0	0	0	116	130	90				2	1		134	176.56	1	39.3	105.79	1	0	0	1	0	0	7.1	1	1		1	0	111
1	88.1	0	0	150	4	5	67	0	87	1.69	30.46	0	0	0	98	145	90				1	0		195	105.49	1	42	93.3	1	1	1	1	1	0	7.1	1	0		1	0	119
1	89.9	0	0	30	4	5	64	0	83	1.58	33.25	0	0	0	103	140	90		1	0	0	0		252.09	336.45	0	37	147.8	0	0	0	0	0	1	6.77	1	0		2	1	75.04
1	88.3	0	0	30	4	5	67	0	88.3	1.57	32.3	0	0	0	97	130	70				2	1		169	188.3	1	53.6	97.74	1	1	0	1	0	1	7.2	0	1	6.6	0	0	159
1	88.1	0	0	30	4	5	67	0	88.5	1.63	33.31	0	0	0	116	125	82	0	0	0	0	0		229	383.06	0	43	146.8	0	1	0	0	0	0	7.1	0	0		1	0	118.3
1	90.1	0	0	30	1	5	60	0	71.5	1.54	30.15	0	0	0	101	110	80				2	1		166	269.99	1	38	114	1	0	0	1	0	0	7.2	1	1		1	0	107
1	89.25	0	0	40	4	5	72	0	84	1.75	27.43	1	0	0	93	140	100				1	0		226.94	313.08	0	77.1	107.22	1	1	0	0	0	1	7.3	1	1		2	1	88.3
1	88.8	0	0	40	4	5	62	0	95	1.7	32.87	0	0	0	107	140	90		1	0	0	0		193.3	146.3	1	36	113.8	1	0	1	1	0	1	5.4	1	1		2	1	86
1	87.8	0	0	30	4	5	60	0	104	1.77	33.2	0	0	0	107	140	100				1	0		187.3	153.53	1	45	91.99	1	1	0	1	0	0	7.92	0	1	5.8	0	0	131
1	90	0	0	30	1	5	62	0	72.5	1.58	29.04	1	0	0	99	124	82	0	0	1	0	0		178.12	97.52	1	56.6	102.02	1	1	1	1	1	0	7.3	0	1		1	0	106.51
1	85.4	0	0	30	4	5	66	0	102	1.64	37.92	0	0	0	106	140	85				1	0		246.08	346.62	0	33	143.76	0	0	0	0	0	0	7.1	1	1	6.6	0	0	133.21
1	85.5	0	0	30	4	5	66	1	81	1.59	32.04	0	0	0	105	130	70				2	1		193.1	141	1	52.3	98.9	1	1	1	1	1	1	5.2	1	0		2	1	97
1	85.2	0	0	75	4	5	65	0	80	1.6	31.25	0	0	0	99	140	90		1	0	0	0		158.95	126.65	1	28.9	104.72	1	0	1	1	0	1	5.2	1	1		1	0	102.04
1	85.2	0	0	30	4	5	66	0	81	1.59	32.04	0	0	0	105	120	82	0	0	1	0	0		263	361	0	32	168.8	0	0	0	0	0	1	6.93	1	0		2	1	97
1	85.8	0	0	75	4	5	65	0	75	1.6	29.3	1	0	0	99	140	90	1	0	0	0	0		158.95	126.65	1	28.9	104.72	1	0	1	1	0	0	7.1	1	1		1	0	102.04
1	84.6	0	0	30	4	5	67	0	66	1.54	27.83	1	0	0	93	140	70				2	1		189.4	141.34	1	52.7	119.94	1	1	1	1	1	1	6.4	0	1		0	0	146.51
1	87.5	0	0	30	4	5	63	0	96	1.74	31.71	0	0	0	102	140	90		1	0	0	0		204	240.64	0	48	107.87	1	1	0	0	0	0	7.4	0	1	6.9	0	0	129
1	88.3	0	0	30	4	5	60	1	90	1.65	32.4	0	0	0	96	110	80				2	1		171.72	145.79	1	49.5	99.2	1	1	1	1	1	1	6.8	0	1		1	0	102.26
1	88.8	0	0	30	4	5	62	0	77.5	1.61	29.9	1	0	0	99	140	90				1	0		179	177.86	1	46	157.2	0	1	0	1	0	1	6.2	0	1	6.6	0	0	134
1	83.52	0	0	400	5	4	80	0	72	1.52	31.16	0	0	0	98	140	95		1	0	0	0		252.85	152.9	0	56.6	165.67	0	1	0	0	0	0	7.3	1	1		1	0	120.54
1	92.53	0	0	30	1	5	64	0	94	1.7	32.53	0	0	0	96	124	84	0	0	1	0	0		231.04	275.55	0	71.8	104.13	1	1	0	0	0	0	7.2	1	1		1	0	109.94
1	89.97	0	0	50	4	5	68	0	102	1.7	35.29	0	0	0	113	150	90				1	0		312	352	0	39.3	162.48	0	0	0	0	0	0	7.9	0	1		2	1	98.05
1	89	0	0	30	4	5	58	1	103	1.7	35.64	0	0	0	106	140	90		1	0	0	0		210.18	90.92	1	52.4	139.6	0	1	1	0	0	0	7.3	0	1		2	1	84.32
1	90	0	0	50	1	5	68	0	83	1.69	29.06	1	0	0	98	122	83	0	0	1	0	0		393.1	220.25	0	66.7	132.2	0	1	0	0	0	0	7.3	0	0		1	0	101.76
1	89.53	0	0	30	4	4	68	0	85	1.63	31.99	0	0	0	99	130	78	0	0	1	0	0		264	330.72	0	36	153.86	0	0	0	0	0	0	7.2	1	0	8.7	0	0	197
1	90.2	0	0	30	1	5	67	0	97.5	1.65	35.81	0	0	0	117	150	90	1	0	0	0	0		215.68	160.36	0	33.4	130.21	0	0	0	0	0	0	8.3	1	0		1	0	121.17
1	86.3	0	0	30	4	5	68	0	120	1.77	38.3	0	0	0	106	150	110				1	0		222.32	97.11	1	40	102.9	1	1	1	0	0	0	7.2	0	0		2	1	71.37
1	88.48	0	0	30	4	4	69	0	72	1.54	30.36	0	0	0	98	126	84	0	0	1	0	0		227.66	161.01	0	53.4	142.06	0	1	0	0	0	1	6.9	1	1		1	0	104.88
1	89.1	0	0	30	4	4	68	0	72	1.6	28.12	1	0	0	97	122	79	0	0	1	0	0		185.5	147.7	1	48	117.96	1	1	1	1	1	1	5.6	0	0	11.8	0	0	243.41
1	89.1	0	0	30	4	4	68	0	78	1.58	31.24	0	0	0	100	140	90	1	0	0	0	0		209.27	224.4	0	48	156.39	0	1	0	0	0	0	7.33	1	1	15.2	0	0	269.9
1	95.58	0	0	30	1	5	58	1	85.5	1.65	31.4	0	0	0	103	140	90				1	0		224	188.3	0	34	123.22	1	0	0	0	0	0	7.3	0	0		1	0	109
1	94.25	0	0	50	1	5	60	0	119	1.8	36.73	0	0	0	112	140	90				1	0		217.2	164.94	0	42	132.4	0	1	0	0	0	0	8.23	1	0		1	0	112.3
1	81.9	0	0	77	4	5	68	0	86	1.62	32.77	0	0	0	109	150	90		1	0	0	0		247.99	184.2	0	52.1	134.7	0	1	0	0	0	1	6.7	0	0	7.3	2	1	98.19
1	89.3	0	0	30	4	4	67	0	87.5	1.69	30.64	0	0	0	102	122	82	0	0	1	0	0		193	188.3	1	35	134.54	0	0	0	1	0	1	6.6	1	1		1	0	117
1	88.06	0	0	30	4	4	69	0	78	1.58	31.24	0	0	0	103	100	79	0	0	1	0	0		230	198.7	0	37.9	152.36	0	0	0	0	0	0	7.1	0	0	10.9	0	0	264
1	87.44	0	0	150	4	4	70	0	88	1.62	33.53	0	0	0	107	124	82	0	0	1	0	0		157.49	96.14	1	50.6	87.66	1	1	1	1	1	0	7.35	1	1	7.6	0	0	133.53
1	89.51	0	0	30	4	4	66	0	83	1.62	31.63	0	0	0	99	160	90	1	0	0	0	0		240	213	0	35	142.6	0	0	0	0	0	0	7.88	0	0	11.2	0	0	247.5
1	88.26	0	0	30	4	4	68	0	102	1.6	39.84	0	0	0	106	126	84	0	0	1	0	0		232	242.25	0	39	144.55	0	0	0	0	0	0	7.2	1	0		1	0	122
1	92.06	0	0	30	1	5	62	0	85	1.68	30.12	0	0	0	98	110	80				2	1		177	129.77	1	47	114.05	1	1	1	1	1	0	6.2	1	1		2	1	92
1	88.88	0	0	50	4	4	67	0	87.5	1.62	33.34	0	0	0	95	122	79	0	0	1	0	0		209.93	197.63	0	45.1	125.3	1	1	0	0	0	1	6.77	0	0		2	1	88.53
1	88.88	0	0	50	4	4	67	0	70	1.52	30.3	0	0	0	99	126	84	0	0	1	0	0		167.37	143.2	1	54	84.73	1	1	1	1	1	0	7.4	1	1	12.3	0	0	238.49
1	92.1	0	0	30	1	5	62	0	78.2	1.62	29.8	1	0	0	99	125	82	0	0	1	0	0		192.18	231.54	1	43.1	102.77	1	1	0	1	0	1	5.6	1	0		2	1	81.08
1	93.2	0	0	30	1	5	60	0	75	1.66	27.22	1	0	0	95	124	84	0	0	1	0	0		315.05	291.42	0	53.1	163.67	0	1	0	0	0	1	6.7	1	0	8.2	0	0	135.35
1	84.62	0	0	37	4	4	74	0	69.5	1.58	27.84	1	0	0	93	128	83	0	0	1	0	0		177.52	66.34	1	40.2	124.05	1	1	1	1	1	1	6.2	1	1	7.7	1	0	107.12
1	86.5	0	0	30	4	5	66	0	84	1.62	32.01	0	0	0	103	110	60				2	1		213.02	344.33	0	26.1	128.04	1	0	0	0	0	0	7.3	1	1	9.2	0	0	173.44
1	89.5	0	0	30	4	5	66	0	91	1.68	32.24	0	0	0	104	124	82	0	0	1	0	0		179.61	233.59	1	32	100.89	1	0	0	1	0	1	6.8	0	0		2	1	78.61
1	91.4	0	0	30	1	5	63	0	82	1.6	32.03	0	0	0	99	140	90				1	0		210.52	199.88	0	36	134.54	0	0	0	0	0	0	7.3	1	0		2	1	84.02
1	89.5	0	0	30	1	5	66	0	88	1.65	32.32	0	0	0	102	144	93				1	0		212	178.81	0	39	112.3	1	0	0	0	0	0	7.1	0	1	6.1	0	0	127
1	87.64	0	0	150	4	4	69	0	78	1.55	32.47	0	0	0	101	125	83	0	0	1	0	0		188	165.3	1	39.2	110.44	1	0	0	1	0	0	7.42	1	1		2	1	89
1	89.5	0	0	30	4	5	59	1	94	1.7	32.53	0	0	0	99	145	100	1	0	0	0	0		287.3	233.18	0	36	144.3	0	0	0	0	0	0	7.9	1	0	8.1	0	0	187.22
1	89.5	0	0	30	4	5	59	1	95	1.71	32.49	0	0	0	99	150	100	1	0	0	0	0		289.48	260.18	0	38	159.2	0	0	0	0	0	0	7.7	1	0	7.7	0	0	155.81
1	89.72	0	0	30	4	4	65	0	90	1.7	31.14	0	0	0	103	122	84	0	0	1	0	0		213.3	334.32	0	32	85.13	1	0	0	0	0	1	6.6	0	0		2	1	90.66
1	88.47	0	0	30	4	4	67	0	90	1.63	33.87	0	0	0	104	140	100		1	0	0	0		182	144.28	1	49	104.14	1	1	1	1	1	1	7.32	1	1		0	0	132
1	89.1	0	0	200	4	4	66	0	83.5	1.61	32.21	0	0	0	98	162	90		1	0	0	0		284.13	297.17	0	39.3	135.39	0	0	0	0	0	0	7.6	0	0	12.3	0	0	241.08
1	87.85	0	0	30	4	4	68	0	88.5	1.65	32.51	0	0	0	103	140	90				1	0		273	219.5	0	31.5	137.2	0	0	0	0	0	0	7.3	1	1	11.2	0	0	235.32
1	89.1	0	0	150	4	4	66	0	110	1.65	40.4	0	0	0	113	150	90				1	0		186	259.11	1	29	126.18	1	0	0	1	0	1	8.3	1	0		2	1	88
1	88.47	0	0	30	4	4	67	0	100	1.71	34.2	0	0	0	101	120	80				2	1		233.2	150.27	0	33.5	118.3	1	0	0	0	0	1	8.1	1	0		2	1	71.57
1	88.47	0	0	40	4	4	67	0	88	1.65	32.32	0	0	0	97	121	81	0	0	1	0	0		188	150.66	1	43	114.87	1	1	0	1	0	0	7.7	0	1		1	0	107.3
1	91.64	0	0	30	1	5	62	0	95	1.71	32.49	0	0	0	99	126	86	0	0	1	0	0		289.48	260.18	0	38	129.44	1	0	0	0	0	0	7.7	1	0		0	0	155.81
1	86.02	0	0	30	4	4	71	0	86	1.62	32.77	0	0	0	98	150	100				1	0		314.78	393.13	0	35.3	161.15	0	0	0	0	0	0	7.2	0	0	8.2	0	0	149.48
1	88.3	0	0	50	4	5	65	0	83	1.53	33.91	0	0	0	93	130	80				2	1		302.49	285.09	0	59.5	135.2	0	1	0	0	0	1	6.54	1	1	8.8	0	0	180.16
1	84.7	0	0	30	4	5	65	0	88	1.68	31.18	0	0	0	101	140	90				1	0		242.73	268.3	0	44.8	105.17	1	1	0	0	0	0	7.1	1	1	7.1	0	0	131.76
1	88.47	0	0	30	4	4	67	0	74	1.56	30.41	0	0	0	99	126	82	0	0	1	0	0		213.76	102.06	1	65.5	127.85	1	1	1	0	0	0	7.3	1	1	10.9	0	0	214.15
1	86.7	0	0	30	4	5	65	0	105	1.82	31.7	0	0	0	102	120	70				2	1		166.81	274.4	1	28	113.93	1	0	0	1	0	0	7.5	1	1		1	0	104.3
1	86.3	0	0	30	4	5	65	0	79.5	1.6	31.05	0	0	0	101	110	90				2	1		283	219.8	0	39.6	139.44	0	0	0	0	0	0	7.3	0	0	5.9	0	0	129
1	89.1	0	0	30	4	4	66	0	84	1.65	30.85	0	0	0	103	140	90				1	0		214.3	289.62	0	40	112.33	1	1	0	0	0	0	7.1	0	0	5.9	0	0	139
1	94.25	0	0	30	1	5	58	1	82	1.63	30.86	0	0	0	102	126	82	0	0	1	0	0		101	206.65	1	39	110.67	1	0	0	1	0	0	7.2	0	0	6.1	0	0	135
1	83.64	0	0	75	4	4	75	0	61	1.52	26.4	1	0	0	92	126	84	0	0	1	0	0		147.9	142.08	1	42	77.48	1	1	1	1	1	1	6.9	0	1		1	0	106.84
1	89.31	0	0	30	4	4	65	0	99.5	1.67	35.68	0	0	0	116	155	90	1	0	0	0	0		124	325.2	1	30	128.86	1	0	0	1	0	0	7.23	0	1		2	1	94
1	86.84	0	0	30	4	4	69	0	94	1.67	33.71	0	0	0	103	140	100	1	0	0	0	0		229	332.1	0	39.2	121.58	1	0	0	0	0	0	7.5	1	0		2	1	85
1	89.31	0	0	30	4	4	65	0	94	1.72	31.77	0	0	0	101	140	95				1	0		297	310.5	0	34	153.88	0	0	0	0	0	1	6.77	1	0		2	1	99
1	88.69	0	0	30	4	4	66	0	97.5	1.65	35.81	0	0	0	105	122	79	0	0	1	0	0		121	382.61	1	36	122.3	1	0	0	1	0	0	7.19	0	0	6.6	0	0	128
1	89.94	0	0	30	4	4	64	0	100	1.76	32.28	0	0	0	99	140	90				1	0		264.06	258.06	0	37.7	164.75	0	0	0	0	0	0	7.2	1	0	7.8	1	0	116.85
1	88.69	0	0	30	4	4	66	0	81	1.65	29.75	1	0	0	96	130	80	0	0	1	0	0		195	142.1	1	55.3	109.3	1	1	1	1	1	1	6.9	0	0		2	1	95
1	88.07	0	0	30	4	4	67	0	85.5	1.63	32.18	0	0	0	107	125	78	0	0	1	0	0		189	277.8	1	40	93.44	1	1	0	1	0	0	7.23	1	0		1	0	123
1	89.31	0	0	30	4	4	65	0	75	1.57	30.43	0	0	0	92	119	77	0	0	1	0	0		244.1	103.4	1	50	130.54	0	1	1	0	0	0	7.33	1	0		1	0	104.88
1	78.15	0	0	50	4	4	84	0	101.3	1.69	35.47	0	0	0	106	110	80				2	1		198	276.34	1	39	103.73	1	0	0	1	0	0	7.3	0	0		1	0	100
1	87.3	0	0	30	4	5	65	0	97	1.78	30.61	0	0	0	94	123	79	0	0	1	0	0		165.64	297.3	1	27	109.18	1	0	0	1	0	0	7.4	1	1	8.2	0	0	161.15
1	87.1	0	0	190	4	5	63	0	99	1.71	33.86	0	0	0	99	118	70				2	1		122	172	1	52	105.6	1	1	0	1	0	1	5.6	0	0		2	1	86
1	99.24	0	0	30	1	5	50	1	91	1.63	34.25	0	0	0	109	140	90				1	0		193.85	125.43	1	66.5	102.26	1	1	1	1	1	0	7.6	0	0	6.6	1	0	107.89
1	87.45	0	0	50	4	4	68	0	87	1.6	33.98	0	0	0	103	140	90				1	0		202.9	212.17	0	33	127.47	1	0	0	0	0	0	7.3	1	0		2	1	68.98
1	89.31	0	0	30	4	4	65	0	79	1.62	30.1	0	0	0	98	124	82	0	0	1	0	0		229	245.15	0	46	133.97	0	1	0	0	0	0	7	0	0		1	0	114
1	88.07	0	0	30	4	4	67	0	83	1.64	30.86	0	0	0	99	126	81	0	0	1	0	0		163	258.49	1	47	124.3	1	1	0	1	0	0	7.3	0	0	6.1	0	0	140
1	96.49	0	0	30	1	5	54	1	90.5	1.64	33.65	0	0	0	108	140	90				1	0		212	154.23	0	47.3	103.76	1	1	0	0	0	0	7.23	0	1		2	1	87
1	97.85	0	0	30	1	5	52	1	109	1.79	34.02	0	0	0	106	140	108				1	0		246	223	0	38	144.3	0	0	0	0	0	0	7.2	1	1		2	1	89
1	95.14	0	0	30	1	5	56	1	100	1.67	35.86	0	0	0	106	140	90				1	0		248.32	83	1	41	150.4	0	1	1	0	0	0	7.2	1	0		2	1	91
1	86.9	0	0	30	4	4	67	0	80	1.62	30.48	0	0	1	99	122	79	0	0	1	0	0		216.36	195.88	0	36	141.18	0	0	0	0	0	1	7.9	1	1		1	0	115.2
1	88.13	0	0	30	4	4	65	0	89.8	1.67	32.2	0	0	0	102	140	80	0	0	1	0	0		236.41	157.2	0	37	112.52	1	0	0	0	0	1	7.8	1	1		2	1	90.45
1	88.13	0	0	30	4	4	65	0	88	1.67	31.55	0	0	0	104	145	100	1	0	0	0	0		279.56	123.26	1	64.4	140.99	0	1	1	0	0	1	4.22	1	0	12.7	2	1	74.24
1	88.13	0	0	75	4	4	65	0	78	1.58	31.24	0	0	0	98	140	90				1	0		219.76	219.77	0	40	135.81	0	1	0	0	0	1	7.7	1	0		2	1	70.28
1	89.37	0	0	30	4	4	63	0	83	1.64	30.86	0	0	0	98	120	80				2	1		223.23	255.85	0	46	126.06	1	1	0	0	0	1	6.9	0	0		2	1	65.72
1	90.08	0	0	100	1	5	60	0	68	1.62	25.91	1	0	0	92	120	70				2	1		188.2	145.2	1	53.2	87.2	1	1	1	1	1	1	6.6	1	1	9.2	0	0	183.4
1	86.36	0	0	30	4	4	66	0	109.5	1.78	34.56	0	0	0	103	145	90				1	0		213.3	188.7	0	42.3	133.26	0	1	0	0	0	0	7.3	1	1		1	0	108.7
1	86.97	0	0	100	4	4	65	0	86	1.65	31.59	0	0	0	98	117	81	0	0	1	0	0		224.24	120.28	1	59.6	140.58	0	1	1	0	0	0	7.1	0	1		1	0	104.87
1	86.36	0	0	30	4	4	66	0	112	1.73	37.42	0	0	0	107	160	90	1	0	0	0	0		173.15	346.29	1	39.6	124.66	1	0	0	1	0	0	7.2	1	0	9	0	0	173.53
1	88.82	0	0	135	4	4	62	0	96	1.73	32.08	0	0	0	103	150	90				1	0		233.6	85.83	1	53.4	136.38	0	1	1	0	0	0	7.52	1	1		2	1	93.23
1	88.2	0	0	150	4	4	63	0	82.8	1.62	31.55	0	0	0	92	140	90	1	0	0	0	0		247.32	274.83	0	42.05	144.2	0	1	0	0	0	1	6.2	1	0		1	0	104.65
1	81.07	0	0	150	4	4	75	0	74.5	1.6	29.1	1	0	0	98	120	60				2	1		181.34	146.45	1	59.1	137.2	0	1	1	1	0	1	6.8	0	0		2	1	94.44
1	84.05	0	0	30	4	4	68	0	77	1.51	33.77	0	0	0	101	124	83	0	0	1	0	0		224.69	177.02	0	64	125.29	1	1	0	0	0	0	7.2	1	1		1	0	108.29
1	84.64	0	0	30	4	4	67	0	78	1.58	31.24	0	0	0	103	119	82	0	0	1	0	0		179	178.52	1	52	91.3	1	1	0	1	0	0	7.6	1	1	6.9	0	0	134
1	80.58	0	0	50	4	4	74	0	72.5	1.68	25.69	1	0	0	91	110	70				2	1		219.35	316.93	0	65.9	123.33	1	1	0	0	0	0	7.2	0	1		1	0	114.88
1	85.84	0	0	35	4	4	65	0	83	1.7	28.72	1	0	0	93	124	83	0	0	1	0	0		186.95	181.06	1	71.3	129.44	1	1	0	1	0	0	7.1	1	1		1	0	115.53
1	88.91	0	0	50	4	4	60	0	93	1.76	30.02	0	0	0	98	140	90				1	0		338.95	234.93	0	35	136.86	0	0	0	0	0	0	7.3	0	0		2	1	83.02
1	85.94	0	0	75	4	4	63	0	76.6	1.5	34.04	0	0	0	104	150	90		1	0	0	0		186.57	216.36	1	53.9	129.4	1	1	0	1	0	0	7.6	1	1	10.7	0	0	279.31
1	76.8	0	0	340	5	4	79	0	75	1.65	27.55	1	0	0	94	127	86	0	0	1	0	0		193.36	99.74	1	33	88.3	1	0	1	1	0	0	7.01	0	0		2	1	88.95
1	86.54	0	0	30	4	4	62	0	85	1.63	31.99	0	0	1	89	140	90				1	0		314.82	163.58	0	34.2	167.3	0	0	0	0	0	0	7.1	1	1		1	0	104.39
1	82.97	0	0	240	4	4	68	0	91	1.7	31.49	0	0	0	92	140	90		1	0	0	0		218.3	200.38	0	40	105.69	1	1	0	0	0	0	7.87	0	0		1	0	113.95
1	86.54	0	0	50	4	4	62	0	99	1.65	36.36	0	0	0	123	145	95				1	0		257	311	0	33	121.8	1	0	0	0	0	0	9.2	0	0		1	0	124.3
1	84.14	0	0	50	4	4	66	0	81	1.62	30.86	0	0	0	104	150	90		1	0	0	0		288	188.5	0	52.3	138	0	1	0	0	0	1	6.88	1	0	6.9	0	0	147
1	89.64	0	0	50	4	4	57	1	87.5	1.67	31.37	0	0	0	103	160	90		1	0	0	0		259.07	332.45	0	39.7	111.88	1	0	0	0	0	0	7.6	1	0	11.8	0	0	255.6
1	76.26	0	0	50	4	4	80	0	75.8	1.68	26.86	1	0	0	93	120	80				2	1		252.14	145.18	1	58.8	164.3	0	1	1	0	0	1	5.2	0	1		2	1	98.65
1	85.44	0	0	30	4	4	62	0	76.5	1.56	31.43	0	0	0	101	140	90				1	0		232.36	237.8	0	35.5	139.3	0	0	0	0	0	0	7.1	0	0		1	0	101.27
1	85.44	0	0	30	4	4	62	0	85	1.77	27.13	1	0	0	93	130	82	0	0	1	0	0		204.81	208.7	0	74.5	88.57	1	1	0	0	0	1	7.33	1	1		2	1	95.75
1	86.04	0	0	30	4	4	61	0	85	1.65	31.22	0	0	0	100	122	82	0	0	1	0	0		246.94	369.27	0	66.3	106.79	1	1	0	0	0	0	7.2	0	0		1	0	108.99
1	85.44	0	0	50	4	4	62	0	86	1.64	31.98	0	0	0	105	145	90		1	0	0	0		171	299	1	45	136.2	0	1	0	1	0	0	9.33	1	0	9.9	0	0	278.66
1	80.21	0	0	30	4	4	71	0	82	1.62	31.25	0	0	0	99	122	84	0	0		1	0		244.97	288.3	0	31	128.56	1	0	0	0	0	1	6.6	1	0		1	0	103.34
1	84.37	0	0	50	4	4	62	0	87	1.53	37.17	0	0	0	108	140	90		1	0	0	0		279.3	176.61	0	39	144.3	0	0	0	0	0	1	7.9	1	1		2	1	82.17
1	83.19	0	0	30	4	4	64	0	80	1.59	31.64	0	0	0	98	121	82	0	0	1	0	0		209.2	217.4	0	38.3	142.2	0	0	0	0	0	0	7.1	1	1		1	0	119.84
1	83.78	0	0	30	4	4	63	0	107	1.65	39.3	0	0	0	106	160	90				1	0		213.2	201	0	35.8	103.8	1	0	0	0	0	0	7.2	0	0		1	0	108.3
1	95.07	0	0	30	1	5	45	1	91.3	1.7	31.59	0	0	0	98	128	84	0	0	1	0	0		182.27	276.7	1	30	96.93	1	0	0	1	0	0	7.1	0	1		2	1	72.87
1	84.96	0	0	30	4	4	61	0	86	1.7	29.76	1	0	0	96	126	82	0	0	1	0	0		233.27	109.09	1	44	167.45	0	1	1	0	0	1	6.33	1	1		2	1	86.06
1	91.15	0	0	30	1	5	51	1	67.8	1.59	26.82	1	0	1	87	150	100	1	0	0	0	0		260.35	188.54	0	48.8	173.84	0	1	0	0	0	0	7.1	1	0		2	1	83.22
1	82.61	0	0	30	4	4	65	0	98	1.65	36	0	0	0	107	150	100				1	0		201.86	253.28	0	31	120.2	1	0	0	0	0	0	7.6	1	1	6.9	0	0	144.01
1	82.15	0	0	50	4	4	64	0	86	1.63	32.37	0	0	0	103	140	90				1	0		195	207.43	1	36	117.51	1	0	0	1	0	0	6.77	0	0		2	1	93
1	82.15	0	0	30	4	4	64	0	80	1.59	31.64	0	0	0	99	125	86	0	0	1	0	0		204.01	189.93	0	35.7	130.32	0	0	0	0	0	0	7.2	1	1	6.8	0	0	129.35
1	83.32	0	0	30	4	4	62	0	100	1.74	33.03	0	0	0	106	140	90		1	0	0	0		163.93	243.82	1	30	115.72	1	0	0	1	0	1	4.1	1	1		2	1	60.97
1	73.42	0	0	300	4	4	80	0	82	1.65	30.12	0	0	0	97	130	80	0	0	1	0	0		220.48	93.84	1	61	140.71	0	1	1	0	0	1	8.2	1	1		1	0	106.33
1	87.52	0	0	30	4	4	55	1	78.3	1.64	29.11	1	0	0	96	160	100	1	0	0	0	0		187.5	214.34	1	44.1	100.53	1	1	0	1	0	1	3.7	1	1		2	1	65.11
1	86.3	0	0	30	4	4	57	1	77	1.6	30.08	0	0	0	99	120	80				2	1		259.59	305.67	0	37.4	121.6	1	0	0	0	0	0	7.3	1	1		0	0	154.5
1	86.9	0	0	30	4	4	56	1	72	1.63	27.1	1	0	0	96	122	82	0	0	1	0	0		212	212.55	0	74.2	156.88	0	1	0	0	0	0	7.2	0	0		1	0	101.43
1	85.09	0	0	30	4	4	59	1	85	1.7	29.41	1	0	0	99	119	78	0	0	1	0	0		223	260.97	0	49.1	102.19	1	1	0	0	0	1	6.6	0	1		2	1	76.69
1	81.14	0	0	30	4	4	64	0	87	1.65	31.96	0	0	0	104	126	84	0	0	1	0	0		242.86	334.26	0	61.1	114.91	1	1	0	0	0	0	7.2	1	1		1	0	118.62
1	86.44	0	0	30	4	4	55	1	99	1.71	33.86	0	0	0	106	125	82	0	0	1	0	0		225	165.14	0	42	149.97	0	1	0	0	0	1	6.6	1	0		1	0	101
1	78.48	0	0	30	4	4	67	0	87	1.7	30.1	0	0	0	98	123	82	0	0	1	0	0		269.43	172.91	0	36.2	192.65	0	0	0	0	0	0	7.1	0	1	9.33	0	0	198.3
1	83.6	0	0	30	4	4	58	1	90.5	1.62	34.48	0	0	0	103	121	82	0	0	1	0	0		233.3	322.11	0	30	160.88	0	0	0	0	0	1	6.66	1	1		2	1	93.23
1	82.44	0	0	30	4	4	60	0	97	1.72	32.79	0	0	0	101	140	100				1	0		188.3	204.37	1	43	94.13	1	1	0	1	0	0	7.72	1	1		2	1	81
1	75.77	0	0	30	4	4	72	0	65	1.78	20.52	2	1	1	82	110	80				2	1		195.24	292.33	1	48.8	127.98	1	1	0	1	0	1	5.1	1	1		2	1	87.47
1	83.76	0	0	30	4	4	56	1	87	1.68	30.82	0	0	0	93	122	82	0	0	1	0	0		218	266	0	35	129.8	1	0	0	0	0	0	7.1	1	1		1	0	106
1	78.08	0	0	310	5	4	66	0	86	1.65	31.59	0	0	0	103	140	110		1	0	0	0		233.59	339.62	0	33	132.67	0	0	0	0	0	0	7.3	1	0	11.2	0	0	255.5
1	84.95	0	0	100	4	4	54	1	69	1.53	29.48	1	0	0	97	126	82	0	0	1	0	0		206.42	268.11	0	26	86.8	1	0	0	0	0	0	7.1	0	1		0	0	204.1
1	79.18	0	0	50	4	4	64	0	81.5	1.6	31.84	0	0	0	101	140	90		1	0	0	0		237	293	0	37	141.4	0	0	0	0	0	0	7.54	0	0		0	0	217
1	80.3	0	0	30	4	4	62	0	82	1.7	28.37	1	0	1	88	119	82	0	0	1	0	0		270.07	197.13	0	67	163.64	0	1	0	0	0	0	7.3	0	1	9.4	1	0	119.62
1	87.37	0	0	30	4	4	50	1	81	1.7	28.03	1	0	0	95	120	80				2	1		238.02	84.87	1	56	115.5	1	1	1	0	0	1	6.72	1	0		2	1	69
1	85.55	0	0	30	4	4	53	1	84	1.66	30.48	0	0	0	99	140	90		1	0	0	0		284.94	246.29	0	38.23	137.22	0	0	0	0	0	0	7.3	0	0		2	1	81.11
1	76.99	0	0	30	4	4	68	0	88	1.7	30.45	0	0	0	97	130	80				2	1		188	192	1	30	109.6	1	0	0	1	0	1	6.2	1	1		2	1	82
1	84.95	0	0	30	4	4	54	1	82	1.59	32.44	0	0	0	103	145	90		1	0	0	0		233	278.31	0	45	132.34	0	1	0	0	0	0	7.1	0	1	7	0	0	154
1	80.3	0	0	30	4	4	62	0	77	1.57	31.24	0	0	0	99	123	82	0	0	1	0	0		218.3	185.23	0	42	113.95	1	1	0	0	0	0	7.2	0	1		1	0	125
1	78.08	0	0	30	4	4	66	0	95.5	1.69	33.44	0	0	0	103	126	84	0	0	1	0	0		219	188.76	0	41.2	131.25	0	1	0	0	0	0	7.2	1	0		1	0	103.3
1	81.44	0	0	50	4	4	60	0	102.5	1.62	39.06	0	0	0	119	165	90	1	0	0	0	0		214	183.75	0	32	121.35	1	0	0	0	0	0	7.6	1	1	9.1	0	0	245.3
1	84.95	0	0	30	4	4	54	1	103	1.77	32.88	0	0	0	107	145	90				1	0		195	174.43	1	44	116.11	1	1	0	1	0	0	7.32	0	0		2	1	88
1	83.76	0	0	50	4	4	56	1	117	1.8	36.11	0	0	0	116	160	90	1	0	0	0	0		233.2	269.94	0	48	166.32	0	1	0	0	0	0	7.9	1	1		1	0	123.3
1	87.37	0	0	30	4	4	50	1	93.5	1.74	30.88	0	0	0	101	130	90				2	1		127	133.95	1	36	114.21	1	0	1	1	0	0	7.2	0	0	6	0	0	129
1	80.3	0	0	30	4	4	62	0	98.3	1.69	34.42	0	0	0	105	140	90				1	0		255	186.1	0	42	145.72	0	1	0	0	0	0	7.33	0	0		1	0	106.33
1	82.02	0	0	30	4	4	59	1	101	1.71	34.54	0	0	0	107	140	90				1	0		229	197.6	0	39.7	149.78	0	0	0	0	0	0	7.32	1	1		1	0	106.5
1	87.98	0	0	30	4	4	49	1	96	1.76	30.99	0	0	0	99	123	82	0	0	1	0	0		220	289.55	0	35.4	126.69	1	0	0	0	0	0	7.2	0	0		1	0	106
1	81.44	0	0	30	4	4	60	0	95	1.69	33.26	0	0	0	106	140	95		1	0	0	0		112	262.22	1	66	136.2	0	1	0	1	0	0	7.1	1	1	7.9	0	0	193
1	80.47	0	0	30	4	4	60	0	76	1.81	23.2	2	1	1	83	110	60				2	1		166.37	148.32	1	46	89.32	1	1	1	1	1	0	7.1	1	1		2	1	83.01
1	79.34	0	0	30	4	4	62	0	100	1.74	33.03	0	0	0	103	124	83	0	0	1	0	0		226.12	377.75	0	39.5	121.07	1	0	0	0	0	0	7.39	1	1		1	0	102.09
1	85.12	0	0	30	4	4	52	1	90	1.66	32.66	0	0	0	104	123	83	0	0	1	0	0		237.57	196.83	0	38.4	130.4	0	0	0	0	0	1	6.77	1	1		2	1	93.56
1	77.69	0	0	200	4	4	65	0	82.4	1.66	29.9	1	0	0	99	140	100				1	0		218.66	246.64	0	53	116.33	1	1	0	0	0	1	6.3	0	1		2	1	88.06
1	85.12	0	0	50	4	4	52	1	120	1.8	37.04	0	0	0	112	110	80				2	1		254	222	0	42	167.6	0	1	0	0	0	1	6.1	1	1		2	1	82
1	78.79	0	0	200	4	4	63	0	107	1.78	33.77	0	0	0	112	140	110				1	0		266.3	188.3	0	40	130.93	0	1	0	0	0	0	7.33	1	0		2	1	99
1	79.34	0	0	30	4	4	62	0	100	1.74	33.03	0	0	0	103	145	90	1	0	0	0	0		226.12	377.75	0	39.5	121.07	1	0	0	0	0	0	7.39	1	1	7.3	1	0	102.09
1	76.77	0	0	30	4	4	65	0	88.3	1.69	30.92	0	0	0	102	123	81	0	0	1	0	0		212	218.58	0	32	123.28	1	0	0	0	0	0	7.72	0	0		0	0	135
1	76.23	0	0	170	4	4	66	0	115	1.84	33.97	0	0	0	113	140	110		1	0	0	0		267.1	228.62	0	33	149.3	0	0	0	0	0	0	10.5	0	0	13.2	0	0	266.6
1	76.77	0	0	150	4	4	65	0	92	1.64	34.21	0	0	0	102	110	80				2	1		201.97	240.91	0	49	104.79	1	1	0	0	0	0	7.66	0	0		2	1	98.39
1	76.77	0	0	30	4	4	65	0	88	1.65	32.32	0	0	0	102	140	90				1	0		163	118.96	1	42	97.21	1	1	1	1	1	0	7.2	0	0		1	0	125.2
1	76.77	0	0	30	4	4	65	0	88.3	1.69	30.92	0	0	0	102	123	83	0	0	1	0	0		212	218.58	0	32	123.28	1	0	0	0	0	0	7.72	0	0	6	0	0	135
1	74.81	0	0	50	4	4	67	0	119	1.8	36.73	0	0	0	122	140	90				1	0		245.1	170.1	0	36.2	156.66	0	0	0	0	0	0	7.9	1	1		1	0	116.3
1	72.74	0	0	30	4	4	71	0	89.5	1.64	33.28	0	0	0	106	155	100				1	0		275.23	351.22	0	73	131.99	0	1	0	0	0	0	7.23	1	0		2	1	99.33
1	74.46	0	0	150	4	4	66	0	76	1.6	29.69	1	0	0	100	121	82	0	0	1	0	0		313.11	246.43	0	94.1	149.32	0	1	0	0	0	0	7.8	1	1		1	0	105.72
1	73.94	0	0	50	4	4	67	0	97	1.7	33.56	0	0	0	106	150	92		1	0	0	0		259.94	163.64	0	40	182.41	0	1	0	0	0	0	7.7	1	1	7.3	1	0	111.92
1	76.78	0	0	50	4	4	60	0	76	1.58	30.44	0	0	0	98	123	84		0	1	0	0		319.99	122.48	1	78.8	166.69	0	1	1	0	0	0	7.3	0	0	7.2	0	0	134.98
1	81.21	0	0	30	4	4	52	1	103	1.72	34.82	0	0	0	105	140	100				1	0		164	97	1	35	109.6	1	0	1	1	0	1	3.9	1	0		2	1	85
1	72.58	0	0	50	4	4	68	0	88	1.6	34.37	0	0	0	96	140	90		1	0	0	0		278.04	287.57	0	33.3	146.93	0	0	0	0	0	0	7.32	1	0	8.4	0	0	149.3
1	73.28	0	0	30	4	4	65	0	90	1.7	31.14	0	0	0	101	125	82	0	0	1	0	0		208.14	224.99	0	60.9	102.24	1	1	0	0	0	0	7.2	1	1	8.6	0	0	160.39
1	70.45	0	0	30	4	4	69	0	105.5	1.75	34.45	0	0	0	104	122	84	0	0	1	0	0		229.77	75.65	1	71	143.64	0	1	1	0	0	0	7.9	1	1		1	0	105.89
1	72.45	0	0	30	4	4	65	0	82	1.63	30.86	0	0	0	97	100	78	0	0	1	0	0		198.48	288.3	1	36	127.75	1	0	0	1	0	0	7.5	0	1	9.2	0	0	228.32
1	85.16	0	0	30	4	4	62	0	82	1.6	32.3	0	0	0	94	140	90				1	0		257.49	195.8	0	39.2	130.66	0	0	0	0	0	1	4.22	1	1		2	1	88.7
1	80.51	0	0	30	4	4	50	1	69	1.38	36.23	0	0	0	106	155	90				1	0		220.3	187.12	0	38	115.4	1	0	0	0	0	0	7.6	1	1		2	1	65.72
1	86.36	0	0	30	4	4	60	0	98	1.7	33.91	0	0	0	103	110	85				2	1		277.68	323.2	0	40	152.96	0	1	0	0	0	0	7.3	1	0		2	1	62.24
1	80.73	0	0	30	4	4	64	0	86	1.68	30.47	0	0	0	102	120	80				2	1		170.16	141.85	1	35	100.79	1	0	1	1	1	1	4.3	0	0		2	1	55.77
1	80.73	0	0	50	4	4	65	0	89	1.63	33.5	0	0	0	103	145	90				1	0		234.54	133.35	1	52	155.87	0	1	1	0	0	0	7.54	0	0		1	0	115.32
1	75.79	0	0	70	4	4	57	1	86	1.63	32.37	0	0	0	105	140	100				1	0		331.22	303.75	0	76.3	144.32	0	1	0	0	0	0	7.3	1	1		0	0	172.81
1	69.17	0	0	100	4	4	70	0	78	1.6	30.47	0	0	0	99	122	82	0	0	1	0	0		185.2	121.22	1	55.4	108.01	1	1	1	1	1	1	6.9	1	1		1	0	118.37
1	82.11	0	0	30	4	4	54	1	85	1.68	30.12	0	0	0	98	120	80				2	1		174.11	277.36	1	77.3	161.22	0	1	0	1	0	1	6.32	1	1		2	1	99.53
1	73.38	0	0	30	4	4	60	0	99	1.7	34.26	0	0	0	108	150	90				1	0		197	201	1	35	121.8	1	0	0	1	0	0	7.33	0	1		1	0	109.22
1	68.4	0	0	30	4	4	70	0	105	1.6	41.02	0	0	0	116	165	90				1	0		257.76	207.19	0	38	138.32	0	0	0	0	0	1	8.2	1	0		1	0	117.5
1	72.36	0	0	50	4	4	62	0	95	1.7	32.87	0	0	0	103	122	82	0	0	1	0	0		224	236	0	51	125.8	1	1	0	0	0	1	6.8	1	1		2	1	97
1	70.57	0	0	50	4	4	64	0	76	1.59	30.06	0	0	0	98	123	81	0	0	1	0	0		231.3	163	0	30	128.4	1	0	0	0	0	1	7.33	1	1		1	0	114.2
1	67.65	0	0	255	4	4	70	0	72.3	1.55	30.09	0	0	0	98	145	90		1	0	0	0		184.5	216.85	1	39	102.13	1	0	0	1	0	0	7.1	1	1	10.9	0	0	201.75
1	72.58	0	0	30	4	4	60	0	88.5	1.65	32.51	0	0	0	106	145	90		1	0	0	0		268.37	188.1	0	33.2	131.2	0	0	0	0	0	0	7.8	1	1	11.8	0	0	241.3
1	71.06	0	0	30	4	4	63	0	88	1.62	33.53	0	0	0	103	140	90				1	0		255.3	191.88	0	37	132.54	0	0	0	0	0	1	7.2	0	1		1	0	120.3
1	71.06	0	0	30	4	4	63	0	84	1.62	32.01	0	0	0	98	110	70				1	0		245.3	223.2	0	35	119.2	1	0	0	0	0	1	7.2	1	1		1	0	108.3
1	73.09	0	0	50	4	4	59	1	82	1.63	30.86	0	0	0	98	110	70				2	1		255.3	342	0	37	129.6	1	0	0	0	0	1	7.8	1	1		1	0	112.3
1	73.6	0	0	30	4	4	58	1	83	1.6	32.42	0	0	0	102	110	73	0	0	1	0	0		248.3	288	0	40	89.4	1	1	0	0	0	1	7.2	1	0		1	0	119.2
1	81.21	0	0	30	4	4	64	0	77.5	1.59	30.66	0	0	0	98	120	80				2	1		233.2	155	0	47	133.8	0	1	0	0	0	1	6.6	0	0		2	1	95
1	76.77	0	0	30	4	4	52	1	81	1.65	29.75	1	0	0	101	110	90				2	1		346	210	0	34	107	1	0	0	0	0	1	7.1	1	1		1	0	119.33
1	73.09	0	0	50	4	4	59	1	82.3	1.68	29.16	1	0	0	96	140	90				1	0		263	361	0	27	105.2	1	0	0	0	0	1	7.3	0	0		1	0	108.2
1	73.09	0	0	30	4	4	59	1	83	1.65	30.49	0	0	0	99	122	81	0	0	1	0	0		289	288.1	0	32	133.18	0	0	0	0	0	0	7.2	1	0	9.2	0	0	201
1	72.07	0	0	300	4	4	61	0	77	1.6	30.08	0	0	0	101	145	90				1	0		213.2	170.55	0	38	108.89	1	0	0	0	0	0	7.88	1	1	10.2	0	0	239.8
1	79.52	0	0	30	4	4	57	1	83.5	1.68	29.58	1	0	0	99	125	83	0	0	1	0	0		240	47.93	1	61	169.41	0	1	1	0	0	1	6.9	1	1		0	0	179.2
1	68.82	0	0	30	4	4	66	0	86	1.66	31.21	0	0	0	97	125	81	0	0	1	0	0		191.11	65.11	1	44.1	133.99	0	1	1	1	0	0	7.1	1	0		2	1	85.42
1	71.28	0	0	30	4	4	61	0	81	1.6	31.64	0	0	0	103	110	80				2	1		154.37	269.89	1	27	123.93	1	0	0	1	0	1	6.9	1	0		2	1	98.66
1	66.45	0	1	20	3	4	71	0	88.5	1.69	30.99	0	0	0	102	160	100				1	0		245.83	225.72	0	69.1	131.59	0	1	0	0	0	0	7.1	0	0		2	1	92.95
1	68.33	0	0	30	4	4	65	0	81	1.64	30.12	0	0	0	99	125	71	0	0	1	0	0		224.07	327.6	0	51.7	133.3	0	1	0	0	0	0	7.1	1	0		0	0	127.69
1	69.53	0	0	30	4	4	63	0	89	1.65	32.69	0	0	0	102	100	90				2	1		255.3	188.32	0	36	83.44	1	0	0	0	0	1	7.23	1	1		1	0	112.33
1	70.02	0	0	30	4	4	62	0	85	1.62	32.39	0	0	0	105	140	90	1	0	0	0	0		250.26	210.3	0	36.2	162.2	0	0	0	0	0	1	7.2	1	0		1	0	111.33
1	65.03	0	0	50	4	4	71	0	127	1.76	41	0	0	0	114	150	90	1	0	0	0	0		201	142.81	1	31	141.44	0	0	1	0	0	0	8.3	0	0		1	0	103
1	71.75	0	0	30	4	4	57	1	87	1.66	31.57	0	0	0	92	123	81	0	0	1	0	0		216.26	317.37	0	59.9	92.89	1	1	0	0	0	0	7.2	1	1		2	1	93.64
1	69.27	0	0	30	4	4	62	0	87	1.68	30.82	0	0	0	99	110	90				2	1		244.3	375.67	0	34	123.95	1	0	0	0	0	1	7.2	1	1		1	0	125.3
1	70.75	0	0	30	4	4	59	1	86	1.65	31.59	0	0	0	102	140	90		1	0	0	0		281.81	199.3	0	39	152.95	0	0	0	0	0	1	7.2	1	1		1	0	116.33
1	69.27	0	0	30	4	4	62	0	82.5	1.62	31.44	0	0	0	101	140	95				1	0		189.3	138.36	1	45	106.73	1	1	1	1	1	0	7.9	1	0		1	0	115.65
1	71.49	0	0	50	4	4	56	1	82.5	1.65	30.3	0	0	0	101	140	90	1	0	0	0	0		289.04	348.79	0	38.3	137.88	0	0	0	0	0	0	7.1	1	0		1	0	108.51
1	68.54	0	0	30	4	4	62	0	68	1.62	25.91	1	0	0	91	110	80				2	1		227.51	249.38	0	76.7	100.93	1	1	0	0	0	1	6.6	1	0		1	0	108.8
1	72.25	0	0	30	4	4	53	1	76	1.57	30.83	0	0	0	96	119	82	0	0	1	0	0		232.67	283.91	0	33.8	121.99	1	0	0	0	0	0	7.1	0	0	8.1	0	0	164.07
1	70.24	0	0	30	4	4	57	1	84	1.6	32.81	0	0	0	96	140	90				1	0		322.09	92.65	1	84.4	139.1	0	1	1	0	0	1	3.22	1	1		2	1	76.38
1	68.78	0	0	30	4	4	60	0	100	1.65	36.73	0	0	0	107	165	90				1	0		171.42	158.83	1	36.2	123.75	1	0	0	1	0	0	7.2	0	0		1	0	107
1	70.24	0	0	30	4	4	57	1	84	1.65	30.85	0	0	0	98	140	95	1	0	0	0	0		290.03	188.3	0	44	103.2	1	1	0	0	0	1	7.2	0	0		1	0	109.33
1	69.75	0	0	30	4	4	58	1	82	1.67	29.4	1	0	0	100	150	100				1	0		256.01	207.41	0	57.8	106.73	1	1	0	0	0	0	7.1	1	0		1	0	122.7
1	69.51	0	0	30	4	4	57	1	80	1.6	31.25	0	0	0	102	122	81	0	0	1	0	0		248.64	300.29	0	50.6	117.98	1	1	0	0	0	1	6.9	1	0		1	0	118
1	67.11	0	0	30	4	4	62	0	83	1.65	30.49	0	0	0	98	140	90				1	0		258.7	239.12	0	54.2	156.68	0	1	0	0	0	1	6.6	0	0		1	0	116.42
1	69.03	0	0	30	4	4	58	1	87	1.6	33.98	0	0	0	97	140	90	1	0	0	0	0		231.34	177.4	0	30.5	141.72	0	0	0	0	0	1	7.1	0	0		1	0	106.33
1	65.71	0	0	30	4	4	65	0	79	1.59	31.25	0	0	0	99	140	90				1	0		255.3	192.3	0	63.8	66.3	1	1	0	0	0	1	7.3	0	0		1	0	110.9
1	67.11	0	0	30	4	4	62	0	90	1.65	33.06	0	0	0	99	150	90				1	0		295.26	180.3	0	37	122.2	1	0	0	0	0	1	7.2	1	1		1	0	121.2
1	58.53	0	0	50	7	4	80	0	82	1.65	30.12	0	0	1	98	125	86	0	0	1	0	0		213.13	187.3	0	44.5	102.1	1	1	0	0	0	1	8.3	1	1		1	0	108.81
1	65.96	0	0	30	4	4	63	0	85	1.63	31.99	0	0	0	101	140	90				1	0		255.3	177.8	0	33.4	123.15	1	0	0	0	0	1	6.6	1	0		2	1	87.93
1	59.36	0	0	305	8	3	78	0	82	1.62	31.25	0	0	0	98	150	90		1	0	0	0		373.22	194.96	0	64.8	139.23	0	1	0	0	0	0	7.32	1	1		2	1	91.01
1	63.03	0	0	470	5	4	68	0	89.5	1.6	34.96	0	0	0	100	130	82	0	0	1	0	0		290.88	232.26	0	36.8	193.83	0	0	0	0	0	0	7.7	1	1	14.8	0	0	285.76
1	66.67	0	0	30	4	4	60	0	94.5	1.75	30.86	0	0	0	95	121	81	0	0	1	0	0		258.07	256.34	0	33.8	136.4	0	0	0	0	0	0	7.1	0	0	7.44	0	0	135.45
1	73.05	0	0	40	4	4	57	1	72.2	1.58	28.92	1	0	0	93	145	100		1	0	0	0		248.14	309.91	0	52.3	133.86	0	1	0	0	0	1	5.6	1	0		2	1	98.55
1	63.72	0	0	30	4	4	65	0	77	1.6	30.08	0	0	0	101	150	100				1	0		247	185.78	0	32	115.7	1	0	0	0	0	0	7.2	0	0		1	0	109
1	58.98	0	0	30	7	3	76	0	78	1.54	32.89	0	0	0	97	150	110		1	0	0	0		234.33	124.86	1	64.6	144.76	0	1	1	0	0	0	7.2	1	1	7.34	0	0	149.88
1	70.3	0	0	300	4	4	51	1	88	1.68	31.18	0	0	0	101	130	84	0	0	1	0	0		227.55	268	0	39.2	124.95	1	0	0	0	0	0	7.3	1	0	14.5	0	0	228.8
1	60.23	0	0	150	4	4	73	0	60	1.66	21.77	2	1	1	80	120	70				2	1		212.45	150.7	0	64.7	117.61	1	1	0	0	0	0	7.2	0	0		1	0	117.92
1	67.88	0	0	300	4	4	56	1	88	1.68	31.18	0	0	0	101	122	83	0	0	1	0	0		227.55	268	0	59.2	124.95	1	1	0	0	0	0	7.3	1	0	14.5	0	0	228.8
1	63.52	0	0	30	4	4	64	0	87	1.7	30.1	0	0	0	102	150	90		1	0	0	0		253.2	117	1	34	159.6	0	0	1	0	0	1	6.9	0	0	9.6	0	0	183.3
1	65.33	0	0	30	4	4	60	0	87.2	1.66	31.64	0	0	0	99	123	81	0	0	1	0	0		240.81	288.9	0	84.1	118.38	1	1	0	0	0	0	7.8	1	0		0	0	267.6
1	63.52	0	0	75	4	4	64	0	74.3	1.5	33.02	0	0	0	105	160	90		1	0	0	0		260.17	312.72	0	36.7	120.31	1	0	0	0	0	0	7.9	1	0	12.7	0	0	265.55
1	59.21	0	1	20	6	3	74	0	85	1.65	31.22	0	0	0	96	140	90				1	0		241.09	278.34	0	45.9	139.52	0	1	0	0	0	1	4.2	1	1		2	1	96.13
1	71.08	0	0	30	4	4	58	1	90	1.7	31.14	0	0	0	98	125	83	0	0	1	0	0		237.82	124.84	1	59.6	153.25	0	1	1	0	0	0	7.1	1	1		1	0	103.77
1	72.08	0	0	30	4	4	56	1	88.5	1.64	32.9	0	0	0	103	80	70				2	1		194	162	1	34	127.6	1	0	0	1	0	1	6.8	1	1		2	1	84
1	65.79	0	0	30	4	4	59	1	86	1.61	33.18	0	0	0	112	140	90				1	0		236.3	188.7	0	44	54.6	1	1	0	0	0	1	7.3	1	1		1	0	124.3
1	68.14	0	0	30	4	4	54	1	95	1.64	35.32	0	0	0	115	110	90				2	1		183	224	1	50	88.2	1	1	0	1	0	1	6.6	0	0		1	1	84
1	68.62	0	0	30	4	4	53	1	86.5	1.71	29.58	1	0	0	99	130	85				2	1		174	135.4	1	48	98.92	1	1	1	1	1	1	7.3	1	0		1	0	118.2
1	65.33	0	0	30	4	4	60	0	96	1.72	32.45	0	0	0	103	145	90				1	0		220	188.6	0	41.3	140.98	0	1	0	0	0	1	6.8	1	1	7.2	0	0	144
1	66.25	0	0	30	4	4	58	1	76.4	1.59	30.22	0	0	0	96	125	82	0	0	1	0	0		225.3	254.69	0	40	101.6	1	1	0	0	0	0	7.1	0	0	9.9	0	0	228
1	64.87	0	0	30	4	4	61	0	77	1.56	31.64	0	0	0	98	140	90		1	0	0	0		301	299.3	0	34	147.3	0	0	0	0	0	1	6.6	0	0		0	0	214
1	66.25	0	0	250	4	4	58	1	92	1.66	33.39	0	0	0	104	140	90		1	0	0	0		233	324.41	0	47	121.12	1	1	0	0	0	0	7.2	1	0	11.7	0	0	233
1	59.21	0	0	200	7	4	74	0	85	1.7	29.41	1	0	0	97	140	90				1	0		231.9	299.91	0	50.1	121.82	1	1	0	0	0	1	6.9	1	1		1	0	101.5
1	57.57	0	0	350	8	3	78	0	78.8	1.55	32.8	0	0	0	99	140	90	1	0	0	0	0		218.61	163.45	0	58.2	127.72	1	1	0	0	0	1	6.9	1	1		1	0	101.39
1	61.57	0	0	30	4	4	67	0	75	1.57	30.43	0	0	0	99	145	90				1	0		266.16	311.28	0	35.5	138.4	0	0	0	0	0	1	4.2	0	0		2	1	80.66
1	58.86	0	0	30	7	3	72	0	88	1.6	34.37	0	0	0	96	165	90	1	0	0	0	0		212.3	171.04	0	42	91.21	1	1	0	0	0	1	7.33	1	1		2	1	76.93
1	58.45	0	0	200	7	3	73	0	86	1.66	31.21	0	0	1	97	128	85	0	0	1	0	0		208	200.27	0	61.9	106.05	1	1	0	0	0	1	7.8	1	0		1	0	102.25
1	59.69	0	0	50	7	3	70	0	82	1.62	31.25	0	0	0	103	123	82	0	0	1	0	0		212.88	158.07	0	39	131.27	0	0	0	0	0	0	7.32	0	0	9.2	0	0	162.3
1	58.86	0	1	20	6	3	72	0	80	1.6	31.25	0	0	0	103	150	90				1	0		238.18	218.4	0	30	164.5	0	0	0	0	0	0	7.3	1	1		2	1	88.44
1	58.45	0	0	30	7	3	73	0	75	1.66	27.22	1	0	1	88	120	80				2	1		215.79	170.07	0	54	97.18	1	1	0	0	0	1	5.2	0	0		2	1	77.39
1	65.86	0	0	30	4	4	56	1	69	1.62	26.29	1	0	0	95	110	70				2	1		218.35	202.34	0	43.6	134.28	0	1	0	0	0	1	6.7	1	0		1	0	109.96
1	66	0	0	30	4	4	65	0	100	1.76	32.28	0	0	0	104	160	90	1	0	0	0	0		145.02	334	1	52	166.2	0	1	0	1	0	0	8.3	1	1	11.2	0	0	276.7
1	77.96	0	0	30	4	4	62	0	109	1.8	33.64	0	0	0	109	110	70				2	1		212.54	162.41	0	31	132.2	0	0	0	0	0	1	3.3	0	1		2	1	79.02
1	62.26	0	0	30	4	4	64	0	78	1.66	28.31	1	0	0	97	127	83	0	0	1	0	0		243.23	75.7	1	57.3	112.2	1	1	1	0	0	0	7.45	1	1	6	0	0	146.23
1	58.69	0	0	150	7	3	71	0	79	1.61	30.48	0	0	0	91	150	90				2	1		249.2	193.88	0	32	128.3	1	0	0	0	0	1	8.6	0	0		2	1	75.92
1	59.11	0	0	300	7	3	70	0	82.5	1.65	30.3	0	0	0	96	150	90				1	0		212.04	184.28	0	44.4	130.78	0	1	0	0	0	0	7.8	1	1		1	0	108.44
1	59.52	0	1	10	6	3	69	0	74	1.68	26.22	1	0	0	92	120	80				2	1		247.64	178.32	0	60.1	151.88	0	1	0	0	0	1	5.4	1	1		2	1	92.16
1	60.79	0	0	30	4	4	66	0	91	1.8	28.09	1	0	0	90	110	90				1	0		278.84	239.2	0	34.9	106.12	1	0	0	0	0	0	7.23	0	0		1	0	103.58
1	63.41	0	0	50	4	4	60	0	82	1.65	30.12	0	0	0	100	140	90		1	0	0	0		291.12	250.69	0	67.7	113.28	1	1	0	0	0	0	7.2	1	1	8.8	0	0	161.63
1	63.41	0	0	150	4	4	60	0	75.4	1.5	33.51	0	0	0	98	150	90		1	0	0	0		223.06	188.75	0	66.5	118.81	1	1	0	0	0	0	7.4	0	0	8.7	0	0	177.41
1	62.96	0	0	30	4	4	61	0	89	1.66	32.3	0	0	0	103	145	90				1	0		255.7	201.43	0	31	116.25	1	0	0	0	0	1	7.7	0	0		1	0	109.33
1	59.11	0	0	350	8	3	70	0	88	1.59	34.81	0	0	0	102	140	90		1	0	0	0		260.96	304.11	0	54.7	125.44	1	1	0	0	0	0	7.2	1	1	7	0	0	137.25
1	57.31	0	0	30	7	3	73	0	78	1.6	30.47	0	0	1	98	160	90				1	0		213.3	166.2	0	33	112.3	1	0	0	0	0	1	7.2	1	1		2	1	87.56
1	59.36	0	1	20	6	3	68	0	82	1.68	29.05	1	0	0	102	110	80				2	1		147.27	184.86	1	37.7	72.6	1	0	0	1	0	1	6.8	1	1		2	1	83.14
1	58.53	0	0	50	7	3	70	0	84	1.62	32.01	0	0	0	103	140	90				1	0		305.93	250.31	0	37.2	198.07	0	0	0	0	0	0	7.1	1	0		1	0	107.05
1	58.53	0	0	35	7	3	70	0	82	1.65	30.12	0	0	0	95	145	95				1	0		345.16	339.46	0	81.9	135.28	0	1	0	0	0	1	6.6	1	1		1	0	122.13
1	56.91	0	0	50	7	3	74	0	85.5	1.65	31.4	0	0	0	102	155	90	1	0	0	0	0		279.52	304.83	0	68.3	110.25	1	1	0	0	0	1	7.22	1	1		1	0	112.33
1	59.36	0	0	50	7	3	68	0	77.5	1.7	26.82	1	0	0	93	140	90		1	0	0	0		224.35	280.86	0	57.2	122.98	1	1	0	0	0	1	6.9	1	1		1	0	117.4
1	58.79	0	0	30	7	3	68	0	80	1.63	30.11	0	0	0	98	125	83	0	0	1	0	0		223.24	162.7	0	39.2	141.77	0	0	0	0	0	0	7.32	0	0		1	0	124.1
1	55.97	0	0	30	7	3	75	0	88.2	1.68	31.25	0	0	0	102	130	82	0	0	1	0	0		228.58	154.44	0	40	136.69	0	1	0	0	0	0	7.3	1	1	7.7	1	0	118.06
1	54.03	0	0	30	7	3	80	0	70.5	1.68	24.98	2	1	0	91	140	90				1	0		207.93	193.63	0	40.1	129.1	1	1	0	0	0	1	6.5	0	0	8.32	0	0	143.8
1	58.79	0	0	1250	8	3	68	0	74	1.6	28.91	1	0	0	95	162	82		1	0	0	0		220.84	164.75	0	51	136.89	0	1	0	0	0	1	7.1	1	0	8.8	0	0	237.7
1	64.41	0	0	50	4	4	55	1	81.5	1.6	31.84	0	0	0	98	140	90		1	0	0	0		207.71	246.65	0	38.7	133.3	0	0	0	0	0	0	7.2	1	0	9.6	1	0	103.76
1	59.2	0	0	30	7	3	67	0	75	1.63	28.23	1	0	0	98	120	70				2	1		170.84	107.57	1	45.4	103.93	1	1	1	1	1	0	7.2	0	0		1	0	109.87
1	56.61	0	0	30	7	3	72	0	75	1.72	25.35	1	0	0	97	150	90				1	0		161.72	149.12	1	56	103.1	1	1	1	1	1	1	6.6	0	0	7.7	0	0	146.64
1	59.46	0	0	50	7	3	65	0	73	1.6	28.52	1	0	1	97	150	95	1	0	0	0	0		233.2	166.2	0	35	118.3	1	0	0	0	0	1	8.3	0	0		2	1	72.12
1	59.05	0	0	301	8	3	66	0	90	1.75	29.39	1	0	0	99	125	86	0	0	1	0	0		260.57	269.97	0	92.9	138.23	0	1	0	0	0	1	6.9	1	1	10.9	0	0	241.46
1	57.81	0	0	150	7	3	69	0	85	1.6	33.2	0	0	0	105	140	90	1	0	0	0	0		233.63	167.16	0	55.5	144.7	0	1	0	0	0	0	7.3	1	1	10.9	0	0	242.3
1	57.81	0	1	20	6	3	69	0	95	1.65	34.89	0	0	0	104	130	82	0	0	1	0	0		264.46	186.45	0	38.1	175.97	0	0	0	0	0	0	7.5	1	0		1	0	116.98
1	61.59	0	0	30	4	4	60	0	87	1.67	31.2	0	0	0	99	140	90				1	0		253.73	66.39	1	46	144.32	0	1	1	0	0	0	7.1	1	1		1	0	124.54
1	63.34	0	0	30	4	4	56	1	82	1.66	29.76	1	0	0	99	140	90				1	0		337.13	77.79	1	61.1	160.47	0	1	1	0	0	1	7.21	0	0		1	0	112.33
1	60.3	0	0	30	4	4	63	0	88	1.7	30.45	0	0	0	101	140	90				1	0		171.92	190.33	1	57.9	75.95	1	1	0	1	0	0	7.33	0	1		1	0	116.24
1	54.52	0	0	30	7	3	76	0	63	1.6	24.61	2	1	1	80	119	82	0	0	1	0	0		198.37	141.34	1	56	88.3	1	1	1	1	1	1	5.33	1	1		2	1	73.19
1	56.07	0	0	200	7	3	72	0	69.5	1.66	25.22	1	0	0	91	126	82	0	0	1	0	0		104	108.2	1	53	112.3	1	1	1	1	1	0	7.32	0	0		1	0	102
1	57.67	0	1	10	6	3	68	0	86	1.63	32.37	0	0	0	103	123	81	0	0	1	0	0		286.03	299.69	0	41.1	184.99	0	1	0	0	0	1	4.4	0	1		2	1	99.83
1	57.26	0	0	50	7	3	69	0	107	1.65	39.3	0	0	0	112	119	79	0	0	1	0	0		227.96	179.12	0	39.4	132.74	0	0	0	0	0	0	7.2	0	1		2	1	99.81
1	56.07	0	0	30	7	3	72	0	74.5	1.64	27.7	1	0	0	96	126	84	0	0	1	0	0		191.19	202.34	1	39	111.72	1	0	0	1	0	0	7.2	1	0		1	0	114.28
1	56.07	0	0	30	7	3	72	0	87	1.65	31.96	0	0	0	97	124	83	0	0	1	0	0		243.2	188.19	0	39.3	119.3	1	0	0	0	0	0	7.3	0	0	7.3	1	0	119.66
1	56.86	0	0	37	7	3	70	0	92.6	1.75	30.24	0	0	0	96	132	81	0	0	1	0	0		204.29	221.01	0	59	101.09	1	1	0	0	0	0	7.3	1	1		2	1	89.2
1	61.87	0	0	30	4	4	58	1	86	1.56	35.34	0	0	0	102	110	70				2	1		325.1	162.55	0	30.9	151.78	0	0	0	0	0	1	7.32	1	0		1	0	114.33
1	62.3	0	0	30	4	4	57	1	71.5	1.65	26.26	1	0	0	93	120	80				2	1		169.01	255.71	1	63.8	124.07	1	1	0	1	0	0	7.2	0	0		1	0	110.98
1	57.26	0	0	300	7	3	69	0	84	1.65	30.85	0	0	0	97	140	90	1	0	0	0	0		290.76	281.92	0	64.9	139.33	0	1	0	0	0	0	7.2	0	0		1	0	120.11
1	58.34	0	0	30	7	3	65	0	95.5	1.68	33.84	0	0	0	99	120	83	0	0	1	0	0		243.34	197.83	0	42.6	161.17	0	1	0	0	0	0	7.32	0	0	9.22	0	0	198.23
1	58.34	0	0	30	7	3	65	0	84	1.63	31.62	0	0	0	98	123	83	0	0	1	0	0		223.8	308.55	0	36.2	138.32	0	0	0	0	0	0	7.62	0	0	6.8	1	0	111.54
1	59.58	0	1	20	6	3	62	0	64.5	1.67	23.13	2	1	1	81	120	80				2	1		211.82	215.71	0	59.8	108.88	1	1	0	0	0	1	4.2	0	0		2	1	85.33
1	57.93	0	0	320	8	3	66	0	81	1.55	33.71	0	0	0	106	160	100	1	0	0	0	0		178.33	288.36	1	33	121.66	1	0	0	1	0	0	9.33	1	1	7	0	0	255.3
1	60.85	0	0	50	4	4	59	1	62	1.6	24.22	2	1	1	81	120	80				2	1		159.12	148.72	1	52.2	78.22	1	1	1	1	1	1	4.32	1	1		2	1	87.23
1	56.33	0	0	30	7	3	70	0	84	1.63	31.62	0	0	0	98	123	85	0	0	1	0	0		223.8	308.55	0	36.2	138.32	0	0	0	0	0	0	7.62	0	0	6.8	1	0	111.54
1	48.94	0	0	250	7	3	90	0	80	1.62	30.48	0	0	0	98	150	90	1	0	0	0	0		225.3	171	0	37.8	113.2	1	0	0	0	0	1	7.1	0	1		2	1	97.18
1	54.38	0	0	30	7	3	75	0	81.5	1.68	28.88	1	0	0	97	140	90				1	0		201.73	230.91	0	73.5	122.05	1	1	0	0	0	1	6.7	1	1		2	1	81.8
1	56.33	0	0	100	7	3	70	0	75	1.61	28.93	1	0	0	98	145	90		1	0	0	0		282	137.94	1	51	103.41	1	1	1	0	0	0	7.4	1	1	10.1	0	0	215
1	57.93	0	0	30	7	3	66	0	84	1.61	32.41	0	0	0	98	120	80				2	1		192.13	142.78	1	56.3	117.27	1	1	1	1	1	0	7.3	1	0		1	0	110.09
1	54.38	0	0	40	7	3	75	0	74	1.65	27.18	1	0	0	93	110	70				2	1		148.25	245.55	1	46	53.14	1	1	0	1	0	1	5.1	0	0		2	1	93.23
1	57.53	0	0	94	7	3	67	0	85	1.59	33.62	0	0	0	92	140	90		1	0	0	0		257.62	161.99	0	57.6	117.2	1	1	0	0	0	0	7.34	1	1	8.9	0	0	187.41
1	56.59	0	0	30	7	3	68	0	90	1.7	31.14	0	0	0	104	119	83	0	0	1	0	0		253.77	192.4	0	41	89.8	1	1	0	0	0	1	7.7	1	1		1	0	109.33
1	56.19	0	0	280	7	3	69	0	108	1.74	35.67	0	0	0	107	145	90		1	0	0	0		255.12	148.39	1	39	145.2	0	0	1	0	0	0	7.75	1	0	9.9	0	0	228.28
1	56.59	0	0	30	7	3	68	0	80	1.62	30.48	0	0	0	98	125	82	0	0	1	0	0		141.22	80.31	1	30.2	94.96	1	0	1	1	0	0	7.1	0	0		2	1	87.27
1	56.19	0	0	30	7	3	69	0	80	1.63	30.11	0	0	0	98	110	70	0	0	1	0	0		223.24	162.7	0	39.2	141.77	0	0	0	0	0	0	7.32	0	0		1	0	124.1
1	53.5	0	0	200	7	3	76	0	76	1.71	25.99	1	0	1	90	145	92				2	1		166.78	159.22	1	56.5	118.2	1	1	0	1	0	1	6.52	0	1		1	0	115.2
1	56.19	0	0	30	7	3	69	0	84	1.59	33.23	0	0	1	102	140	90	1	0	0	0	0		245.59	205.02	0	39.3	165.29	0	0	0	0	0	1	5.32	1	1		2	1	89.09
1	56.19	0	0	50	7	3	69	0	88	1.64	32.72	0	0	0	99	150	90				1	0		242.22	235.7	0	33.3	151.64	0	0	0	0	0	0	7.3	0	0		1	0	122.31
1	52.26	0	0	30	7	3	78	0	68	1.5	30.22	0	0	0	99	123	85	0	0	1	0	0		294.61	308.2	0	61.6	111.41	1	1	0	0	0	0	7.3	0	0	12.3	0	0	246.5
1	59.72	0	0	30	7	3	59	1	75.4	1.54	31.79	0	0	0	97	122	84	0	0	1	0	0		270.31	170.22	0	69	145.2	0	1	0	0	0	0	7.2	0	0	12.1	0	0	267.7
1	59.3	0	0	30	7	3	60	0	93	1.72	31.44	0	0	0	98	148	93				2	1		274	201.16	0	50	103.77	1	1	0	0	0	0	7.1	1	0	6	0	0	131
1	58.07	0	1	20	6	3	63	0	85	1.68	30.12	0	0	0	98	140	90				1	0		280	202.3	0	43.3	106.24	1	1	0	0	0	0	7.1	0	0		1	0	112
1	55.28	0	0	30	7	3	70	0	70	1.51	30.7	0	0	1	89	126	83	0	0	1	0	0		190.87	122.57	1	36	126.46	1	0	1	1	0	0	7.6	1	1		1	0	117.51
1	56.73	0	0	150	7	3	65	0	83.5	1.62	31.82	0	0	0	99	145	90				1	0		270.58	240.7	0	61.3	161.14	0	1	0	0	0	0	7.5	1	0	7.1	0	0	137.62
1	55.94	0	0	250	7	3	67	0	72	1.59	28.48	1	0	0	96	140	90		1	0	0	0		226.9	181.62	0	38	112.3	1	0	0	0	0	1	6.8	0	0		2	1	83.54
1	53.63	0	0	30	7	3	73	0	85	1.6	33.2	0	0	0	99	125	84	0	0	1	0	0		194.65	138.74	1	64.1	102.8	1	1	1	1	1	0	7.1	0	1	8.5	0	0	191.55
1	58.22	0	0	30	7	3	60	0	78.5	1.72	26.53	1	0	0	93	110	80	0	0	1	0	0		265.78	348.3	0	51	145.12	0	1	0	0	0	0	7.1	1	0		1	0	114.48
1	56.61	0	0	30	7	3	64	0	80	1.75	26.12	1	0	0	92	150	100		1	0	0	0		281.28	109.86	1	58.3	181.01	0	1	1	0	0	0	6.5	0	0	7.5	0	0	126.02
1	57.01	0	0	50	7	3	63	0	93	1.66	33.75	0	0	0	105	140	90				1	0		264.72	296.4	0	34.3	141.14	0	0	0	0	0	0	7.4	1	0	9.8	0	0	178.3
1	56.21	0	1	10	6	3	65	0	71	1.75	23.18	2	1	1	88	120	70	0	0	1	0	0		155.2	129.52	1	49.8	99.3	1	1	1	1	1	1	3.77	0	0		1	0	100.56
1	59.33	0	0	150	7	3	56	1	73	1.56	30	1	0	0	98	140	90	1	0	0	0	0		221.2	313.2	0	47.2	151.2	0	1	0	0	0	0	7.2	1	0	9.2	0	0	212.15
1	58.51	0	1	10	6	3	58	1	114	1.8	35.19	0	0	0	116	160	90				1	0		213.95	215.04	0	39.2	119.94	1	0	0	0	0	1	6.92	0	0		2	1	70.9
1	55.7	0	0	30	7	3	65	0	76	1.61	29.32	1	0	0	98	123	82	0	0	1	0	0		137	181.28	1	42	58.74	1	1	0	1	0	1	6.8	1	1		1	0	102
1	57.57	0	0	30	7	3	59	1	83	1.65	30.49	0	0	0	99	140	90				1	0		263.44	316.07	0	62.9	137.22	0	1	0	0	0	1	6.8	1	0		1	0	119.97
1	53.19	0	0	30	7	3	69	0	74	1.7	25.61	1	0	1	88	110	80	0	0	1	0	0		184.8	102.74	1	38.7	102.1	1	0	1	1	0	1	5.2	0	0		2	1	98.01
1	56.26	0	0	30	7	3	61	0	86	1.63	32.37	0	0	0	98	140	90				1	0		232.2	286.63	0	44.2	162.5	0	1	0	0	0	1	6.9	1	1		0	0	146.42
1	56.55	0	0	30	7	3	59	1	63	1.68	22.32	2	1	1	82	120	70	0	0	1	0	0		287.83	270.72	0	42	191.69	0	1	0	0	0	0	7.2	0	1		2	1	88.33
1	54.88	0	0	30	7	3	62	0	99	1.67	35.5	0	0	0	104	150	90	1	0	0	0	0		179	211	1	43	103.8	1	1	0	1	0	1	6.6	0	0		1	0	122
1	52.25	0	0	200	7	3	69	0	88	1.71	30.09	0	0	0	109	140	90				1	0		387.73	344.55	0	38.8	135.3	0	0	0	0	0	1	6.22	0	1		1	0	110.37
1	49.05	0	0	330	8	3	78	0	57	1.64	21.19	2	1	1	79	140	80				1	0		157.82	103.45	1	40.6	96.33	1	1	1	1	1	0	7.1	1	0		1	0	124
1	49.14	0	0	150	7	3	74	0	74	1.53	31.61	0	0	0	98	150	90	1	0	0	0	0		283.2	315.99	0	50.1	180	0	1	0	0	0	0	7.1	1	0		1	0	125.88
1	53.47	0	0	30	7	3	62	0	96	1.72	32.45	0	0	0	101	110	85	0	0	1	0	0		260	323	0	39	156.4	0	0	0	0	0	1	7.8	0	0		1	0	109.3
1	51.18	0	0	330	8	3	67	0	79.5	1.62	30.29	0	0	0	97	140	90				1	0		295.49	313.92	0	34.2	161.74	0	0	0	0	0	0	7.3	0	0	6.9	0	0	129.39
1	46.64	0	0	400	8	3	79	0	83	1.6	32.42	0	0	1	90	145	90	1	0	0	0	0		190.42	89.08	1	38.7	133.9	0	0	1	1	0	1	6.9	0	1		1	0	105.66
1	47.63	0	0	200	10	3	76	0	83.5	1.6	32.62	0	0	0	104	145	90				1	0		259.58	149.16	1	84.5	145.25	0	1	1	0	0	0	7.55	1	0		2	1	86.18
1	49.82	0	0	150	7	3	66	0	87	1.62	33.15	0	0	0	98	140	90				1	0		298.82	178.3	0	32.4	130.76	0	0	0	0	0	0	7.33	1	1	5.5	0	0	137.09
1	50.82	0	0	200	7	3	62	0	82	1.66	29.76	1	1	1	81	170	80	0	0	0	0	0		247.51	106.69	1	59.6	166.57	0	1	1	0	0	0	7.2	0	0	8.2	0	0	131.79
1	47.26	0	0	559	8	3	70	0	85.3	1.62	32.5	0	0	0	98	140	90			0	0	0		322.35	117.25	1	93.3	155.5	0	1	1	0	0	0	7.33	0	0	6.6	0	0	137.61
1	43.7	0	0	300	10	2	80	0	79	1.56	32.46	0	0	0	102	175	72				1	0		223.83	56.5	1	60.8	151.73	0	1	1	0	0	1	6.7	0	0		2	1	94.05
1	43.7	0	0	900	11	2	80	0	80	1.62	30.48	0	0	0	97	150	90	1	0	0	0	0		195.12	78.55	1	45.2	134.21	0	1	1	1	0	1	6.9	0	0		2	1	99.07
1	51	0	0	200	7	3	58	1	70.5	1.6	27.54	1	0	0	97	145	90				1	0		197.3	190.15	1	46.1	103.41	1	1	0	1	0	1	5.6	1	1		1	0	101.37
1	50.64	0	0	30	7	3	59	1	89	1.66	32.3	0	0	0	99	125	89	0	0	1	0	0		276.96	282.34	0	79.8	166.2	0	1	0	0	0	0	7.34	0	0	11.8	0	0	241.5
1	43.96	0	0	150	10	2	78	0	92.4	1.72	31.23	0	0	0	103	140	100	1	0	0	0	0		212.33	244.72	0	71.5	144.2	0	1	0	0	0	1	6.2	0	0		1	0	105.28
1	49.19	0	0	30	7	3	62	0	79	1.65	29.02	1	0	0	98	126	86	0	0	1	0	0		272	314	0	48	119.2	1	1	0	0	0	0	7.2	1	0		2	1	96
1	43.91	0	0	300	10	2	77	0	70	1.6	27.34	1	0	1	88	140	90	1	0	0	0	0		142.28	66.03	1	31.2	97.87	1	0	1	1	0	1	8.2	1	0		2	1	74.11
1	43	0	0	450	11	2	80	0	75	1.55	31.22	0	0	0	98	145	90				1	0		238.29	221.68	0	54.9	139.02	0	1	0	0	0	0	7.32	1	1		2	1	84.51
1	42.66	0	0	1500	11	2	80	0	73	1.63	27.48	1	0	0	96	140	90				1	0		190.5	122.21	1	36	107.6	1	0	1	1	0	0	7.32	0	0		2	1	65.04
1	43.87	0	0	330	11	2	76	0	77.5	1.54	32.68	0	0	0	101	160	90	1	0	0	0	0		245.2	178.6	0	43.3	125.2	1	1	0	0	0	1	7.9	0	0		2	1	96.86
1	48.07	0	0	30	7	3	63	0	85	1.65	31.22	0	0	0	98	140	90	1	0	0	0	0		220.93	160.44	0	51.6	137.24	0	1	0	0	0	0	7.3	0	0	6.6	0	0	129.39
1	48.02	0	0	30	7	3	62	0	82	1.59	32.44	0	0	0	102	123	82	0	0	1	0	0		255.3	192.3	0	58.6	91.3	1	1	0	0	0	1	7.1	1	0		1	0	109.32
1	50.05	0	0	30	7	3	55	1	85.5	1.7	29.58	1	0	0	99	155	95				1	0		317.44	121.93	1	82.1	160.55	0	1	1	0	0	0	7.1	0	0		1	0	123.06
1	44.31	0	0	300	10	2	69	0	89	1.7	30.8	0	0	0	103	140	90	1	0	0	0	0		203.9	255.43	0	44.7	108.11	1	1	0	0	0	0	7.2	1	1	17.1	0	0	209.2
1	43.34	0	0	900	11	2	70	0	88	1.67	31.55	0	0	0	99	140	90	1	0	0	0	0		224.2	172.36	0	45	114.7	1	1	0	0	0	1	7.4	1	0		2	1	73.55
1	43.34	0	0	302	11	2	70	0	88	1.68	31.18	0	0	0	101	170	90	1	0	0	0	0		256.89	291.85	0	36	118.33	1	0	0	0	0	1	6.33	1	1		2	1	83
1	43.29	0	0	200	10	2	68	0	84	1.64	31.23	0	0	0	90	122	82	0	0	1	0	0		272.77	167.68	0	56.1	183.13	0	1	0	0	0	1	6.77	0	0		1	0	112.63
1	42.93	0	0	30	10	2	66	0	83	1.68	29.41	1	0	0	96	131	81	0	0	1	0	0		233.2	188.2	0	41.3	147.2	0	1	0	0	0	0	7.22	0	0		2	1	90.72
1	41.15	0	0	300	10	2	71	0	89.5	1.7	30.97	0	0	0	92	145	90	1	0	0	0	0		225.29	157.38	0	47.3	146.51	0	1	0	0	0	1	6.77	1	1		1	0	104.48
1	39.69	0	0	1200	11	2	72	0	86	1.7	29.76	1	0	0	106	140	90	1	0	0	0	0		230.93	187.84	0	56.7	136.66	0	1	0	0	0	0	7.2	1	1		2	1	93.18
1	41.11	0	0	30	10	2	61	0	91	1.69	31.86	0	0	0	99	140	90				1	0		342.76	110.94	1	65.3	188.4	0	1	1	0	0	0	7.1	0	0		1	0	123.4
1	32.82	0	0	185	10	2	65	0	103.5	1.77	33.04	0	0	0	101	170	90	1	0	0	0	0		358.04	231.62	0	35.8	166.72	0	0	0	0	0	0	7.6	0	0	6.9	0	0	134.41
1	29.67	0	0	300	13	1	72	0	85	1.66	30.85	0	0	0	107	150	90				1	0		302.21	177.2	0	75	178.2	0	1	0	0	0	0	7.1	0	0	8.3	0	0	149.87
1	29.89	0	0	1500	14	1	67	0	88	1.64	32.72	0	0	0	101	140	90				1	0		229.24	190.2	0	37.2	139.3	0	0	0	0	0	0	7.4	1	1	7.8	0	0	188.33
1	27.55	0	0	300	13	1	68	0	77	1.59	30.46	0	0	0	96	145	90				1	0		348.49	151.86	0	58.7	159.42	0	1	0	0	0	0	7.1	1	1	7.3	0	0	135.33
1	24.56	0	0	320	14	1	80	0	70.2	1.6	27.42	1	0	0	96	140	100	1	0	0	0	0		157.07	95.51	1	55	102.97	1	1	1	1	1	1	6.6	0	0	12.3	0	0	235.31
1	22.94	0	0	450	14	1	65	0	95.9	1.78	30.27	0	0	0	103	140	100				1	0		175.36	82.95	1	37	121.77	1	0	1	1	0	0	7	0	0		2	1	79.55
1	20.75	0	0	600	14	1	72	0	75	1.58	30.04	0	0	0	96	140	90	1	0	0	0	0		222.97	141.47	1	42	152.68	0	1	1	0	0	0	7.2	1	1	12.3	0	0	289.75
1	14.74	0	0	350	17	0	80	0	88.5	1.7	30.62	0	0	0	99	120	80	0	0	1	0	0		230.05	168.24	0	62.9	133.5	0	1	0	0	0	0	7.8	1	1	9.2	0	0	160.88
1	4.81	0	0	1500	17	0	70	0	81	1.65	29.75	1	0	0	90	122	83	0	0	1	0	0		234	225	0	46.6	142.4	0	1	0	0	0	0	7.32	0	0	13.2	0	0	226.3
2	101.88	1	1	20	0	5	71	0	67	1.52	29	1	0	0	90	120	90				2	1		99.99	69.56	1	31.4	54.68	1	0	1	1	0	0	5.2	1	1	6.1	1	0	103.46
2	103.26	1	1	10	0	5	67	0	42.5	1.5	18.89	2	1	1	67	100	70				2	1		165.8	52.24	1	43.7	71.2	1	1	1	1	1	1	3.2	1	1		2	1	81.57
2	114.77	1	1	10	0	5	49	1	65	1.56	26.71	1	0	0	86	110	85				2	1		213.18	94.27	1	49	109.23	1	1	1	0	0	1	5.1	1	1		2	1	86.94
2	123.17	1	1	10	0	5	38	1	58	1.57	23.53	2	1	1	70	120	70				2	1		198	103	1	64	93.2	1	1	1	1	1	1	4.52	1	0		2	1	82
2	91.7	1	1	20	0	5	80	0	82.8	1.6	32.34	0	0	0	98	140	100	1	0	0	0	0		243.8	121.83	1	59.4	90	1	1	1	0	0	0	6.9	1	1		1	0	110.78
2	93	1	1	10	0	5	78	0	66.5	1.58	26.64	1	0	0	85	120	80				2	1		192.3	115.82	1	55	93.32	1	1	1	1	1	1	4.8	1	0		2	1	68
2	105.59	1	1	10	0	5	59	1	65.5	1.54	27.62	1	0	0	88	110	90				2	1		180.63	114.4	1	45.6	112.15	1	1	1	1	1	1	5.88	1	1		2	1	86.62
2	110.98	1	1	10	0	5	51	1	60	1.6	23.44	2	1	1	70	110	70				2	1		198.39	144.33	1	45	100.55	1	1	1	1	1	1	4.23	1	0		2	1	69.08
2	109.51	1	1	10	0	5	52	1	57.5	1.53	24.56	2	1	1	70	120	60				2	1		172.85	88.52	1	49	106.15	1	1	1	1	1	1	4.22	1	1		2	1	54.04
2	121.68	1	1	10	0	5	37	1	65.5	1.66	23.77	2	1	1	76	110	70				2	1		170.68	139.05	1	50	92.87	1	1	1	1	1	0	6.1	1	1		2	1	68.61
2	97.87	1	1	10	0	5	68	0	62.5	1.54	26.35	1	0	0	87	120	70				2	1		144.13	149.1	1	53.7	88.7	1	1	1	1	1	1	4.3	1	1		2	1	85.24
2	104.35	1	1	10	0	5	58	1	62.5	1.54	26.35	1	0	0	82	116	74	0	0	1	0	0		192.59	144.33	1	41	92.36	1	1	1	1	1	1	4.3	0	0		2	1	88.38
2	102.17	1	1	10	0	5	61	0	67.5	1.52	29.22	1	0	0	93	120	80				2	1		166.55	145.1	1	51.6	92.8	1	1	1	1	1	0	7.05	1	1		1	0	104.65
2	130.65	1	1	19	0	5	26	1	52	1.56	21.37	2	1	1	68	110	70				2	1		189.93	147.15	1	47	87.6	1	1	1	1	1	1	4.77	1	1		2	1	92.89
2	123.51	1	1	10	0	5	34	1	49	1.52	21.21	2	1	1	68	120	80				2	1		144.14	112.87	1	47	74.57	1	1	1	1	1	1	3.9	1	1		2	1	63.66
2	125.26	1	1	10	0	5	32	1	47	1.52	20.34	2	1	1	75	130	60				2	1		168.3	82.98	1	59.3	67.3	1	1	1	1	1	1	3.89	1	1		2	1	79.4
2	97.37	1	1	10	0	5	67	0	82	1.53	35.03	0	0	0	99	120	80				2	1		325.59	135.62	1	45	153.47	0	1	1	0	0	0	6.9	1	1	6	0	0	127.65
2	98.75	1	1	10	0	5	65	0	57	1.5	25.33	1	0	0	80	130	80				2	1		197.2	100.19	1	42.8	98.33	1	1	1	1	1	1	4.5	1	1		2	1	92.17
2	95.34	1	1	10	0	5	70	0	66.5	1.56	27.33	1	0	0	89	130	80				2	1		186.94	85.09	1	71.9	108.02	1	1	1	1	1	1	5.7	1	1		2	1	86.38
2	97.37	1	1	10	0	5	67	0	57	1.5	25.33	1	0	0	86	125	85				2	1		140.29	82.85	1	51	72.72	1	1	1	1	1	1	5.23	1	1		2	1	85.4
2	97.37	1	1	10	0	5	67	0	66	1.51	28.95	1	0	0	90	120	80				2	1		252.08	290.46	0	36	107.99	1	0	0	0	0	0	6.4	1	1		2	1	85.19
2	90.13	1	1	10	0	5	78	0	68.8	1.57	27.91	1	0	0	88	118	78	0	0	1	0	0		194.59	141.68	1	81.8	100.45	1	1	1	1	1	1	5.77	1	1		2	1	96.5
2	113.77	1	1	10	0	5	44	1	54	1.55	22.48	2	1	1	71	110	70				2	1		178.6	136.7	1	50.1	101.16	1	1	1	1	1	1	4.2	1	1		0	0	107.68
2	106.8	1	1	10	0	5	53	1	65.6	1.55	27.3	1	0	0	98	100	80				2	1		181.49	133.7	1	42	92.75	1	1	1	1	1	1	5.2	1	1		2	1	84.89
2	115.37	1	1	10	0	5	42	1	61.2	1.6	23.91	2	1	1	72	120	70				2	1		147.29	63.15	1	49.1	105.56	1	1	1	1	1	1	3.4	0	1		2	1	75
2	112.18	1	1	10	0	5	46	1	55	1.57	22.31	2	1	1	73	110	70				2	1		166.8	142.3	1	51.2	98.33	1	1	1	1	1	1	4	1	1		2	1	97.66
2	113.77	1	1	10	0	5	44	1	54	1.55	22.48	2	1	1	70	110	70				2	1		178.6	136.7	1	50.1	101.16	1	1	1	1	1	1	4.2	1	1		1	0	107.68
2	93.45	1	1	10	0	5	72	0	63.5	1.54	26.78	1	0	0	88	110	80				2	1		201.92	160.35	0	42.1	127.75	1	1	0	0	0	1	5.1	1	1		2	1	83.73
2	103.23	1	1	20	0	5	57	1	69	1.56	28.35	1	0	0	88	120	75				2	1		165.18	182.8	1	48	110.62	1	1	0	1	0	0	6.5	1	1		1	0	121.62
2	127.45	1	1	10	0	5	27	1	57	1.64	21.19	2	1	1	70	140	60				2	1		187.1	146.37	1	49.6	108.23	1	1	1	1	1	0	6.7	1	1		2	1	78.03
2	125.67	1	1	10	0	5	29	1	60	1.54	25.3	1	0	0	81	110	80				2	1		180.93	131.03	1	47	117.72	1	1	1	1	1	1	3.6	1	1		2	1	76.21
2	118.81	1	1	10	0	5	37	1	59	1.6	23.05	2	1	1	74	100	80				2	1		191.13	148.55	1	48	89.1	1	1	1	1	1	1	4.4	1	1		2	1	85.76
2	125.67	1	1	10	0	5	29	1	56	1.57	22.72	2	1	1	75	110	60				2	1		149.59	111.76	1	50.8	96.44	1	1	1	1	1	1	4.5	1	1		2	1	66.23
2	125.67	1	1	10	0	5	29	1	48.2	1.55	20.06	2	1	1	68	120	60				2	1		174.63	90.5	1	43	90.11	1	1	1	1	1	1	4.23	1	1		2	1	63.08
2	121.34	1	1	10	0	5	34	1	65	1.6	25.39	1	0	0	86	125	85				2	1		192.6	142.12	1	47	115.18	1	1	1	1	1	1	5.1	1	1		2	1	83.38
2	113.1	1	1	10	0	5	44	1	66	1.62	25.15	1	0	0	82	110	70				2	1		150.67	86.89	1	46.5	96.79	1	1	1	1	1	1	5.6	1	1		2	1	71.53
2	99.67	1	1	10	0	5	62	0	80	1.51	35.09	0	0	0	98	130	90				2	1		205.27	112.79	1	38.3	99.3	1	0	1	0	0	1	6.6	1	1	6.9	1	0	110.81
2	125.84	1	1	10	0	5	28	1	71	1.65	26.08	1	0	0	86	130	60				2	1		148.31	59.16	1	51.6	104.88	1	1	1	1	1	1	4.99	1	1		2	1	98.87
2	111.67	1	1	10	0	5	45	1	60	1.62	22.86	2	1	1	72	110	60				2	1		156.77	52.32	1	57	89.31	1	1	1	1	1	1	4.5	1	1		2	1	73.25
2	123.21	1	1	10	0	5	31	1	71.5	1.57	29.01	1	0	0	93	110	70				2	1		178.65	86.9	1	36	125.27	1	0	1	1	0	1	5.6	1	1		2	1	74.74
2	113.25	1	1	10	0	5	43	1	62	1.64	23.05	2	1	1	70	120	80				2	1		180.3	144.8	1	52	88.3	1	1	1	1	1	1	4.2	1	1		2	1	66.8
2	128.52	1	1	20	0	5	25	1	64.6	1.58	25.88	1	0	0	81	120	70				2	1		155.8	143.2	1	59	89.33	1	1	1	1	1	1	5.2	1	1		2	1	55.7
2	105.57	1	1	10	0	5	53	1	55	1.6	21.48	2	1	1	72	120	75				2	1		186.2	140.15	1	49	95.88	1	1	1	1	1	0	7.1	1	1		2	1	71.39
2	99.8	1	1	10	0	5	61	0	57.5	1.5	25.56	1	0	0	82	120	80				2	1		191.47	97.43	1	72.5	98.2	1	1	1	1	1	1	4.8	1	1		2	1	85.74
2	107.06	1	1	10	0	5	51	1	60	1.55	24.97	2	1	0	81	120	70				2	1		182.86	141.61	1	48.4	116.14	1	1	1	1	1	1	4.5	1	1		2	1	84.94
2	125.84	1	1	10	0	5	28	1	72	1.66	26.13	1	0	0	86	110	60				2	1		152.3	99.3	1	41.7	98.3	1	1	1	1	1	1	4.8	1	1		2	1	88.87
2	111.67	1	1	10	0	5	45	1	60	1.63	22.58	2	1	1	70	100	60				2	1		156.77	52.32	1	57	89.31	1	1	1	1	1	1	4.5	1	1		2	1	73.25
2	123.21	1	1	10	0	5	31	1	79	1.57	32.05	0	0	0	99	130	70				2	1		178.65	86.9	1	36	125.27	1	0	1	1	0	1	5.6	1	1		2	1	74.74
2	113.25	1	1	10	0	5	43	1	64	1.65	23.51	2	1	1	74	130	80				2	1		188.3	144.2	1	52	92.3	1	1	1	1	1	1	4.8	1	1		2	1	66.79
2	123.21	1	1	10	0	5	31	1	80	1.57	32.46	0	0	0	99	130	70				2	1		244.3	186.8	0	36	125.27	1	0	0	0	0	1	5.6	1	1		2	1	74.74
2	113.25	1	1	10	0	5	43	1	62	1.66	22.5	2	1	1	70	130	80				2	1		186.25	148.84	1	48.3	89.32	1	1	1	1	1	1	5.2	1	1		2	1	56.76
2	95.01	1	1	10	0	5	68	0	57	1.62	21.72	2	1	1	71	110	70				2	1		117.71	147.85	1	53.1	93.2	1	1	1	1	1	1	4.1	1	1		2	1	90.64
2	87.95	1	1	10	0	4	79	0	68.3	1.68	24.2	2	1	1	73	120	80				2	1		178.22	119.3	1	48.2	85.33	1	1	1	1	1	0	7.01	1	1		1	0	105.58
2	99.94	1	1	10	0	5	60	0	63	1.54	26.56	1	0	0	88	120	80				2	1		148.35	87.18	1	44.8	94.11	1	1	1	1	1	1	5.32	1	1		2	1	65.77
2	115.83	1	1	20	0	5	39	1	70	1.6	27.34	1	0	0	87	120	70				2	1		175.1	101.67	1	49.1	105.67	1	1	1	1	1	1	3.32	1	1		2	1	89.02
2	107.97	1	1	20	0	5	49	1	59.5	1.63	22.39	2	1	1	74	120	75				2	1		156.22	133.21	1	54.3	98.3	1	1	1	1	1	1	4.3	1	1		2	1	66.8
2	99.94	1	1	10	0	5	60	0	55	1.62	20.96	2	1	1	70	110	85				2	1		151.37	83.09	1	47	87.75	1	1	1	1	1	1	4.3	1	1		2	1	65.41
2	121.66	1	1	10	0	5	32	1	65	1.58	26.04	1	0	0	86	130	70				2	1		131.79	71.99	1	57.2	90.19	1	1	1	1	1	1	5.3	0	1		2	1	67.18
2	101.35	1	1	10	0	5	58	1	77	1.54	32.47	0	0	0	98	150	90				1	0		202.79	204.31	0	42.4	119.53	1	1	0	0	0	1	4.4	1	1		2	1	70.06
2	104.24	1	1	10	0	5	54	1	74.5	1.54	31.41	0	0	0	101	140	80				2	1		178.11	144.3	1	50.6	96.7	1	1	1	1	1	1	6.6	0	1		2	1	95.36
2	126.01	1	1	10	0	5	27	1	66	1.58	26.44	1	0	0	87	120	70				2	1		188.3	139.93	1	51	78.3	1	1	1	1	1	1	3.77	1	1		2	1	76.01
2	120.81	1	1	10	0	5	33	1	58.5	1.6	22.85	2	1	1	71	115	70				2	1		189.43	62.17	1	54	78.3	1	1	1	1	1	1	4.1	1	1		2	1	79.83
2	99.94	1	1	10	0	5	60	0	66	1.55	27.47	1	0	0	87	125	80				2	1		193.38	147.2	1	66.2	104.28	1	1	1	1	1	0	6.2	1	1		2	1	87.5
2	108.73	1	1	20	0	5	48	1	59.5	1.56	24.45	2	1	1	69	125	75				2	1		154.22	132.61	1	57.4	97.3	1	1	1	1	1	1	4.44	1	1		2	1	64.19
2	99.94	1	1	10	0	5	60	0	55	1.52	23.81	2	1	1	71	100	85				2	1		151.37	83.09	1	47	87.75	1	1	1	1	1	1	4.3	1	1		2	1	65.41
2	91.86	1	1	10	0	5	72	0	65	1.7	22.49	2	1	1	66	100	80				2	1		146.58	112.88	1	55.7	88.3	1	1	1	1	1	1	4.6	0	1		1	0	102.33
2	96.49	1	1	10	0	5	65	0	64	1.56	26.3	1	0	0	91	110	70				2	1		231.88	143.92	1	56.9	106.2	1	1	1	0	1	1	6.6	1	1	6	0	0	131
2	108.89	1	1	10	0	5	47	1	64	1.56	26.3	1	0	0	85	110	70				2	1		169.81	140.77	1	43	98.3	1	1	1	1	1	1	5.1	1	1		2	1	83.21
2	112.79	1	1	20	0	5	42	1	78	1.65	28.65	1	0	0	89	125	82	0	0	1	0	0		219.49	235.15	0	35	137.46	0	0	0	0	0	1	5.33	0	0		2	1	92.08
2	123.57	1	1	10	0	5	29	1	57	1.63	21.45	2	1	1	73	120	70				2	1		157.3	145.3	1	54.3	103.94	1	1	1	1	1	0	3.2	1	0		2	1	75
2	105.88	1	1	10	0	5	51	1	80	1.58	32.05	0	0	0	98	121	81	0	0	1	0	0		192	148.33	1	41.33	123	1	1	1	1	1	1	6.9	1	1		1	0	112
2	101.51	1	1	10	0	5	57	1	65	1.5	28.89	1	0	0	90	130	70				2	1		219.71	100.52	1	46.1	101.11	1	1	1	0	1	1	5.56	1	1		1	0	101.32
2	123.57	1	1	10	0	5	29	1	50	1.6	19.53	2	1	1	69	110	70				2	1		181.22	71.58	1	54.6	89.32	1	1	1	1	1	1	3.1	1	1		2	1	75.38
2	105.88	1	1	10	0	5	51	1	59	1.6	23.05	2	1	1	72	120	80				2	1		146.47	88.82	1	57.4	91.31	1	1	1	1	1	1	4.2	1	1		2	1	70.2
2	108.89	1	1	10	0	5	47	1	69	1.58	27.64	1	0	0	87	120	80				2	1		181.2	147.09	1	46	93.22	1	1	1	1	1	1	5.7	1	0		2	1	73.5
2	105.13	1	1	10	0	5	52	1	72	1.61	27.78	1	0	0	88	125	80				2	1		188.32	100.65	1	51	97.17	1	1	1	1	1	1	5.8	1	1		2	1	89.19
2	122.71	1	1	10	0	5	30	1	70	1.59	27.69	1	0	0	87	120	80				2	1		186	145	1	65	98.2	1	1	1	1	1	1	5.6	1	1		2	1	67
2	118.47	1	1	10	0	5	35	1	45	1.49	20.27	2	1	1	66	120	60				2	1		170	101	1	57	92.8	1	1	1	1	1	1	3.8	1	1		2	1	66
2	126.2	1	1	10	0	5	26	1	67	1.6	26.17	1	0	0	84	120	80				2	1		193	86	1	55	66.2	1	1	1	1	1	1	5.7	1	1		2	1	73
2	118.47	1	1	10	0	5	35	1	63	1.52	27.27	1	0	0	86	130	70				2	1		180	69	1	49	127.2	1	1	1	1	1	1	5.7	1	1		2	1	77
2	124.44	1	1	10	0	5	28	1	70	1.64	26.03	1	0	0	86	130	80				2	1		188	137	1	49	111.6	1	1	1	1	1	1	5.62	1	1		2	1	82
2	113.58	1	1	10	0	5	41	1	52	1.52	22.51	2	1	1	69	120	70				2	1		135	120	1	46	65	1	1	1	1	1	1	5.1	1	1		2	1	85
2	119.31	1	1	10	0	5	34	1	59	1.56	24.24	2	1	1	70	120	80				2	1		167	144	1	58	80.2	1	1	1	1	1	1	4.1	1	1		2	1	86
2	126.2	1	1	10	0	5	26	1	56	1.56	23.01	2	1	1	70	120	70				2	1		172	73.13	1	72	85.37	1	1	1	1	1	1	4.1	1	1		2	1	92
2	127.09	1	1	20	0	5	25	1	70.5	1.66	25.58	1	0	0	84	110	70				2	1		187.2	135.65	1	42	66.87	1	1	1	1	1	1	5.1	0	0		2	1	97
2	120.15	1	1	20	0	5	33	1	55	1.52	23.81	2	1	1	70	120	70				2	1		181	93.65	1	40	92.22	1	1	1	1	1	1	4.2	0	1		2	1	97
2	111.21	1	1	10	0	5	44	1	52	1.61	20.06	2	1	1	76	110	80				2	1		170	80.46	1	59	94.91	1	1	1	1	1	1	4.1	1	0		2	1	96
2	112.79	1	1	10	0	5	42	1	57.5	1.6	22.46	2	1	1	74	120	80				2	1		191.94	129.58	1	52	82.33	1	1	1	1	1	1	4.22	1	1		2	1	68.14
2	122.71	1	1	10	0	5	30	1	58	1.6	22.66	2	1	1	74	130	80				2	1		172.89	81.5	1	56	94.32	1	1	1	1	1	1	4.7	1	1		2	1	69.79
2	118.47	1	1	10	0	5	35	1	59	1.58	23.63	2	1	1	73	130	70				2	1		172	102.34	1	84	67.53	1	1	1	1	1	1	3.9	1	1		2	1	99
2	120.99	1	1	10	0	5	32	1	57	1.51	25	1	1	0	81	115	70				2	1		171.3	139.3	1	68	81.8	1	1	1	1	1	1	5.22	1	1		2	1	87
2	115.19	1	1	10	0	5	39	1	65	1.53	27.77	1	0	0	88	120	65				2	1		179.32	147.37	1	49	101.25	1	1	1	1	1	0	6.23	1	1		2	1	85
2	122.71	1	1	10	0	5	30	1	62.5	1.53	26.7	1	0	0	87	120	80				2	1		189.3	109.1	1	40	109.18	1	1	1	1	1	1	5.2	0	1		2	1	93
2	116.82	1	1	10	0	5	37	1	52	1.59	20.57	2	1	1	70	120	80				2	1		190	71.87	1	51	84.23	1	1	1	1	1	1	3.2	1	1		2	1	91
2	116	1	1	10	0	5	38	1	52	1.63	19.57	2	1	1	68	120	80				2	1		118.2	145.3	1	48.3	64.3	1	1	1	1	1	1	3.22	0	0		2	1	76
2	121.85	1	1	10	0	5	31	1	70	1.76	22.6	2	1	1	73	110	70				2	1		174	133.6	1	48.7	98.58	1	1	1	1	1	1	3.12	1	1		2	1	76
2	104.4	1	1	26	0	5	53	1	77	1.61	29.71	1	0	0	93	126	83	0	0	1	0	0		162.12	115.22	1	48.9	90.18	1	1	1	1	1	0	7.1	1	1		1	0	125.9
2	101.51	1	1	20	0	5	57	1	68	1.53	29.05	1	0	0	92	140	90				1	0		311.13	254.79	0	39	104.17	1	0	0	0	0	1	4.4	1	1		2	1	74.39
2	98.69	1	1	10	0	5	61	0	67.5	1.65	24.79	2	1	1	73	120	70				2	1		199	144	1	55.3	94.9	1	1	1	1	1	1	4.6	1	1		2	1	94
2	104.4	1	1	10	0	5	53	1	68	1.61	26.23	1	0	0	86	125	85				2	1		155.2	148.3	1	49.4	89.2	1	1	1	1	1	1	4.1	1	1		2	1	99
2	121.85	1	1	10	0	5	31	1	59	1.57	23.94	2	1	1	74	110	80				2	1		145.8	143.2	1	52.3	96.3	1	1	1	1	1	1	5.2	1	0		2	1	75
2	123.57	1	1	10	0	5	29	1	57	1.55	23.73	2	1	1	72	110	80				2	1		157.3	145.3	1	54.3	89.3	1	1	1	1	1	1	4.2	1	0		2	1	75
2	108.89	1	1	10	0	5	47	1	67.5	1.65	24.79	2	1	1	70	120	70				2	1		198.22	116.87	1	53	92.3	1	1	1	1	1	1	4.4	0	0		2	1	99
2	125.32	1	1	10	0	5	27	1	65.5	1.65	24.06	2	1	1	70	120	80				2	1		190	127.8	1	61	61.44	1	1	1	1	1	1	4.4	0	0		2	1	99
2	120.99	1	1	10	0	5	32	1	63	1.58	25.24	1	0	0	82	130	70				2	1		159	144.92	1	41	99.02	1	1	1	1	1	0	6.8	1	0		1	0	106
2	118.47	1	1	10	0	5	35	1	81	1.75	26.45	1	0	0	86	125	90				2	1		197	79.43	1	42	109.2	1	1	1	1	1	1	5.7	0	0		2	1	96
2	110.43	1	1	10	0	5	45	1	71	1.71	24.28	2	1	0	90	120	80				2	1		166	93.04	1	43	84.2	1	1	1	1	1	1	4.4	0	0		2	1	90
2	121.85	1	1	10	0	5	31	1	75	1.71	25.65	1	0	0	91	120	80				2	1		174	133.6	1	52.3	94.98	1	1	1	1	1	1	5.3	1	0		2	1	91
2	116	1	1	10	0	5	38	1	73	1.78	23.04	2	1	1	76	110	85				2	1		126	108.11	1	42	62.38	1	1	1	1	1	1	4.1	1	0		2	1	90
2	116.82	1	1	10	0	5	37	1	73	1.68	25.86	1	0	0	82	120	70				2	1		181.3	116.11	1	49	88.78	1	1	1	1	1	0	6.9	1	1		1	0	123
2	105.13	1	1	10	0	5	52	1	77	1.72	26.03	1	0	0	88	120	70				2	1		193.2	148.7	1	44.3	119.3	1	1	1	1	1	1	5.2	1	1		2	1	89
2	120.99	1	1	10	0	5	32	1	74	1.71	25.31	1	0	0	83	130	70				2	1		168	135.62	1	40	92.88	1	1	1	1	1	1	4.7	1	0		2	1	90
2	122.71	1	1	10	0	5	30	1	73	1.71	24.96	2	1	1	71	120	80				2	1		163	140.53	1	42	84.89	1	1	1	1	1	1	4.5	1	1		2	1	99
2	115.19	1	1	10	0	5	39	1	56	1.64	20.82	2	1	1	68	110	70				2	1		199.2	148.68	1	73	94.27	1	1	1	1	1	1	4.02	1	1		2	1	97
2	118.47	1	1	20	0	5	35	1	72	1.61	27.78	1	0	0	92	110	70				2	1		202	167.68	0	37	101.46	1	0	0	0	0	1	5.8	1	1		2	1	80
2	120.99	1	1	10	0	5	32	1	56	1.66	20.32	2	1	1	68	110	70				2	1		182	145.2	1	44	77.32	1	1	1	1	1	1	3.55	1	1		2	1	83
2	116.82	1	1	10	0	5	37	1	65.5	1.63	24.65	2	1	1	70	120	80				2	1		198	147.6	1	44.3	79.32	1	1	1	1	1	1	4.1	0	0		2	1	91
2	112	1	1	10	0	5	43	1	67	1.66	24.31	2	1	1	74	100	60				2	1		120.3	108.32	1	43.3	56.32	1	1	1	1	1	1	5.1	1	1		2	1	82
2	117.64	1	1	27	0	5	36	1	55	1.66	19.96	2	1	1	67	120	70				2	1		152	101.59	1	47.3	94.68	1	1	1	1	1	1	4.19	0	1		2	1	92
2	87.58	1	1	10	0	4	78	0	70.5	1.62	26.86	1	0	0	86	115	75	0	0	1	0	0		175.01	51.05	1	56.6	98.2	1	1	1	1	1	1	5.66	1	1		2	1	86.49
2	88.82	1	1	10	0	4	76	0	56	1.58	22.43	2	1	1	68	110	80				2	1		172.84	119.22	1	94.4	55.2	1	1	1	1	1	1	3.2	0	1		2	1	81.55
2	86.36	1	1	10	0	4	80	0	64	1.54	26.99	1	0	0	87	120	80				2	1		180	55.33	1	56	112.93	1	1	1	1	1	0	6.2	0	0		2	1	90
2	100.96	1	1	10	0	5	57	1	63	1.56	25.89	1	0	0	82	120	80				2	1		174.1	115.2	1	48.5	80.33	1	1	1	1	1	0	7.2	1	1		1	0	103.16
2	116.18	1	1	10	0	5	37	1	63	1.62	24.01	2	1	1	70	100	80				2	1		194.72	147.1	1	65	96.28	1	1	1	1	1	1	4.11	1	1		2	1	82.37
2	122.04	1	1	10	0	5	30	1	75	1.7	25.95	1	0	0	85	125	80				2	1		190.6	103.81	1	53	96.3	1	1	1	1	1	1	5.1	1	1		2	1	73.54
2	117.83	1	1	10	0	5	35	1	56	1.55	23.31	2	1	1	70	120	80				2	1		193.32	122.1	1	35	101.1	1	0	1	1	0	1	5.1	0	1		2	1	93.71
2	101.67	1	1	10	0	5	56	1	59	1.5	26.22	1	0	0	86	120	80				2	1		257.92	109.5	1	56	100.02	1	1	1	0	0	1	5.5	1	1		2	1	89.98
2	126.4	1	1	10	0	5	25	1	57.5	1.63	21.64	2	1	1	74	120	70				2	1		168.34	43.74	1	43	116.59	1	1	1	1	1	1	3.22	1	1		2	1	82.76
2	109.25	1	1	10	0	5	45	1	64.5	1.58	25.84	1	0	0	81	120	90				2	1		192.72	98.08	1	50.1	84.6	1	1	1	1	1	1	4.2	0	0		2	1	84.87
2	104.01	1	1	20	0	5	52	1	66	1.52	28.57	1	0	0	98	124	82	0	0	1	0	0		245.92	207.96	0	41	153.33	0	1	0	0	0	0	6.6	1	1		1	0	120.85
2	99.71	1	1	10	0	5	58	1	94	1.7	32.53	0	0	0	96	123	82	0	0	1	0	0		231.04	275.55	0	71.8	104.13	1	1	0	0	0	0	7.2	1	1		1	0	109.94
2	125.73	1	1	20	0	5	25	1	57	1.55	23.73	2	1	1	71	110	70				2	1		188.66	86.82	1	63.7	107.6	1	1	1	1	1	1	3.9	1	1		2	1	66.84
2	116.38	1	1	10	0	5	36	1	61	1.53	26.06	1	0	0	81	120	70				2	1		191.72	147.94	1	43	93.2	1	1	1	1	1	1	4.2	0	1		2	1	72.75
2	110.02	1	1	10	0	5	44	1	70	1.61	27.01	1	0	0	88	126	80				2	1		199.22	144.04	1	66.9	89.33	1	1	1	1	1	1	4.2	1	1		2	1	86.69
2	119.7	1	1	10	0	5	32	1	67	1.66	24.31	2	1	1	74	110	60				2	1		118.69	131.44	1	40	52.4	1	1	1	1	1	1	4.4	1	1		2	1	50.66
2	112.36	1	1	20	0	5	41	1	57.5	1.6	22.46	2	1	1	69	120	80				2	1		120.92	129.67	1	58.5	96.8	1	1	1	1	1	1	3.6	1	1		2	1	95.01
2	120.54	1	1	10	0	5	31	1	49	1.53	20.93	2	1	1	68	110	70				2	1		193.32	145.71	1	46.5	96.33	1	1	1	1	1	1	4.1	1	1		2	1	77.01
2	113.95	1	1	10	0	5	39	1	59.5	1.68	21.08	2	1	1	68	130	60				2	1		120.14	146.58	1	50.5	96.2	1	1	1	1	1	1	3.11	1	1		2	1	87.12
2	99.02	1	1	10	0	5	59	1	87	1.65	31.96	0	0	0	97	110	80				2	1		189.88	73.76	1	46.2	128.93	1	1	1	1	1	1	5.6	1	1	11.1	2	1	85.42
2	101.84	1	1	10	0	5	55	1	60	1.65	22.04	2	1	1	70	120	70				2	1		169.77	94.2	1	62.1	88.83	1	1	1	1	1	1	4.5	1	1		2	1	87.11
2	123.11	1	1	10	0	5	28	1	63	1.54	26.56	1	0	0	86	130	70				2	1		137.95	69.82	1	44.6	79.39	1	1	1	1	1	1	5.33	1	1		2	1	69.47
2	122.24	1	1	10	0	5	29	1	57	1.63	21.45	2	1	1	70	110	60				2	1		174.53	121.42	1	63	78.2	1	1	1	1	1	1	3.77	1	1		2	1	69.95
2	104.01	1	1	10	0	5	52	1	58	1.6	22.66	2	1	1	69	110	70				2	1		159.71	141.92	1	49	96.33	1	1	1	1	1	1	4.1	0	1		2	1	90.47
2	106.22	1	1	10	0	5	49	1	58	1.64	21.56	2	1	1	68	110	75				2	1		194.57	122.23	1	47	80.11	1	1	1	1	1	1	4.82	1	0		2	1	54.24
2	120.54	1	1	10	0	5	31	1	60	1.6	23.44	2	1	1	78	130	70				2	1		191.65	92.21	1	40	77.3	1	1	1	1	1	1	3.23	1	1		2	1	82.53
2	113.95	1	1	20	0	5	39	1	68.5	1.65	25.16	1	0	0	82	120	80				2	1		113.3	148.3	1	42.3	76.3	1	1	1	1	1	1	5.89	1	1		2	1	87
2	109.25	1	1	10	0	5	45	1	64.5	1.58	25.84	1	0	0	85	100	70				2	1		192.72	98.08	1	50.1	84.6	1	1	1	1	1	1	4.2	0	0		2	1	84.87
2	104.01	1	1	20	0	5	52	1	78	1.52	33.76	0	0	0	97	140	90	1	0	0	0	0		245.92	207.96	0	31.6	153.33	0	0	0	0	0	1	4.2	1	1		1	0	120.85
2	120.54	1	1	10	0	5	31	1	71	1.7	24.57	2	1	0	87	120	70				2	1		147.68	48.73	1	44.3	103.63	1	1	1	1	1	1	4.55	1	1		2	1	72.18
2	112.36	1	1	10	0	5	41	1	72	1.65	26.45	1	0	0	91	120	85				2	1		185.88	133.96	1	46	113.09	1	1	1	1	1	1	5.6	0	0		2	1	74.86
2	116.38	1	1	10	0	5	36	1	61	1.53	26.06	1	0	0	87	110	70				2	1		150.33	147.94	1	43	92.3	1	1	1	1	1	1	4.2	0	1		2	1	72.75
2	100.42	1	1	10	0	5	57	1	87	1.67	31.2	0	0	0	96	140	90				1	0		187	194.79	1	38	110.04	1	0	0	1	0	1	5.6	0	0		2	1	97
2	107.72	1	1	10	0	5	47	1	77	1.71	26.33	1	0	0	95	130	90				2	1		196	45.3	1	44.3	89.33	1	1	1	1	1	1	4.2	1	1		2	1	75
2	125.73	1	1	20	0	5	25	1	57	1.55	23.73	2	1	1	75	130	70				2	1		188.66	86.82	1	63.7	107.6	1	1	1	1	1	1	3.9	1	1		2	1	66.84
2	116.38	1	1	10	0	5	36	1	61	1.53	26.06	1	0	0	87	130	70				2	1		193.2	147.94	1	43	96.74	1	1	1	1	1	1	4.2	0	1		2	1	72.75
2	101.84	1	1	10	0	5	55	1	57	1.6	22.27	2	1	1	74	110	80				2	1		145.2	110.1	1	52	87.22	1	1	1	1	1	1	4.3	1	1		2	1	99.96
2	125.73	1	1	10	0	5	25	1	81	1.66	29.39	1	0	0	98	125	80				2	1		184.42	91.06	1	35	131.21	0	0	1	1	0	0	6.2	1	1		2	1	65.47
2	116.38	1	1	10	0	5	36	1	56	1.62	21.34	2	1	1	72	110	80				2	1		183	113.85	1	54	91.23	1	1	1	1	1	1	3.33	0	0		2	1	76
2	94.93	1	1	10	0	5	65	0	70	1.58	28.04	1	0	0	88	130	85				2	1		197.42	109.3	1	67.2	108.36	1	1	1	1	1	0	6.66	1	1		2	1	96.3
2	85.44	1	1	10	3	4	80	0	48.5	1.6	18.95	2	1	1	69	130	80				2	1		194.01	142.46	1	70.6	84.92	1	1	1	1	1	1	4.1	1	1		2	1	98
2	96.27	1	1	10	0	5	63	0	51	1.51	22.37	2	1	1	68	130	80				2	1		189.3	124.45	1	53.2	92	1	1	1	1	1	1	4.2	1	1		2	1	91.77
2	109.44	1	1	20	0	5	44	1	53	1.58	21.23	2	1	1	72	120	70				2	1		183.2	85.89	1	64.3	84.32	1	1	1	1	1	1	4.1	0	1		2	1	76.97
2	117.41	1	1	10	0	5	34	1	46.5	1.51	20.39	2	1	1	68	120	80				2	1		180.23	118.79	1	72.3	84.17	1	1	1	1	1	1	4.3	1	1		2	1	69.14
2	111.77	1	1	10	0	5	41	1	70	1.65	25.71	1	0	0	87	110	70				2	1		170.84	51.56	1	55	105.53	1	1	1	1	1	1	4.2	1	0		2	1	65.61
2	107.91	1	1	10	0	5	46	1	54.5	1.6	21.29	2	1	1	68	120	80				2	1		161.45	55.38	1	47.7	78.9	1	1	1	1	1	1	3.9	1	1		2	1	61.31
2	118.23	1	1	10	0	5	33	1	56.8	1.6	22.19	2	1	1	71	120	80				2	1		135.2	119.94	1	49.6	78.2	1	1	1	1	1	1	4.4	1	1		2	1	77.68
2	114.96	1	1	10	0	5	37	1	55	1.6	21.48	2	1	1	71	120	60				2	1		167.15	66.74	1	57.3	96.5	1	1	1	1	1	1	4.2	1	1		2	1	75.32
2	101.3	1	1	10	0	5	55	1	68	1.62	25.91	1	0	0	85	110	70				2	1		170.91	33.94	1	49	111.2	1	1	1	1	1	1	5.2	1	1		2	1	83.68
2	117.41	1	1	10	0	5	34	1	65	1.6	25.39	1	0	0	86	120	70				2	1		178.32	96.92	1	50	103.2	1	1	1	1	1	1	4.8	1	1		2	1	59.49
2	107.91	1	1	10	0	5	46	1	66	1.56	27.12	1	0	0	86	130	80				2	1		177.81	86.7	1	56	104.47	1	1	1	1	1	1	4.33	1	1		2	1	69.03
2	109.44	1	1	20	0	5	44	1	53	1.58	21.23	2	1	1	72	110	70				2	1		183.2	85.89	1	64.3	84.32	1	1	1	1	1	1	4.1	0	1		2	1	76.97
2	115.77	1	1	10	0	5	36	1	48.7	1.54	20.53	2	1	1	72	125	80				2	1		182.3	144.33	1	70.3	92.3	1	1	1	1	1	1	4.5	1	1		2	1	69.14
2	117.41	1	1	10	0	5	34	1	46.5	1.51	20.39	2	1	1	68	130	80				2	1		180.23	118.79	1	72.3	84.17	1	1	1	1	1	1	4.3	1	1		2	1	69.14
2	91.81	1	1	10	0	5	69	0	64.5	1.58	25.84	1	0	0	88	120	80				2	1		190.18	113.16	1	60.9	106.65	1	1	1	1	1	1	5.1	1	1		2	1	85.99
2	104.38	1	1	10	0	5	50	1	62	1.62	23.62	2	1	1	72	120	60				2	1		155.32	89.84	1	51	98.3	1	1	1	1	1	1	3.9	0	0		2	1	69.74
2	102.21	1	1	10	0	5	53	1	48	1.54	20.24	2	1	1	71	110	80				2	1		118.84	77.3	1	55	83.2	1	1	1	1	1	1	4.6	1	0		2	1	83.76
2	113.56	1	1	10	0	5	38	1	74	1.65	27.18	1	0	0	89	120	70				2	1		189.33	143.17	1	62.1	98.04	1	1	1	1	1	1	5.6	0	0	6.8	0	0	129.41
2	98.68	1	1	10	0	5	58	1	62	1.55	25.81	1	0	0	87	125	70				2	1		158.85	140.86	1	55.1	78.32	1	1	1	1	1	1	5.5	1	1		1	0	121.38
2	105.86	1	1	10	0	5	48	1	51	1.64	18.96	2	1	1	70	110	70				2	1		174.81	81.06	1	48.8	109.8	1	1	1	1	1	1	4.33	0	1		2	1	84.57
2	117.62	1	1	10	0	5	33	1	54	1.62	20.58	2	1	1	72	110	80				2	1		199.2	144.3	1	50	98.32	1	1	1	1	1	1	3.7	1	1		2	1	67.42
2	116.8	1	1	10	0	5	34	1	51.6	1.59	20.41	2	1	1	69	100	60				2	1		121.87	69.83	1	43	64.9	1	1	1	1	1	1	4.1	1	1		2	1	79.35
2	103.65	1	1	10	0	5	51	1	55	1.56	22.6	2	1	1	70	110	80				2	1		134.1	103.63	1	44.2	88.2	1	1	1	1	1	1	4.1	1	1		2	1	94.84
2	108.11	1	1	10	0	5	45	1	80	1.62	30.48	0	0	0	98	120	70				2	1		194.19	148.11	1	43.8	125.33	1	1	1	1	1	0	6.66	0	1		1	0	109.15
2	124.42	1	1	10	0	5	25	1	69	1.68	24.45	2	1	1	70	110	70				2	1		151.82	126.1	1	61.4	78.2	1	1	1	1	1	1	4.56	1	1		2	1	82.78
2	112.77	1	1	20	0	5	39	1	56	1.58	22.43	2	1	1	69	120	80				2	1		180.98	133.6	1	59.3	114.36	1	1	1	1	1	1	3.5	0	1		2	1	84.7
2	99.37	1	1	20	0	5	57	1	53	1.56	21.78	2	1	1	71	110	80				2	1		183.32	40.57	1	56.3	104.91	1	1	1	1	1	1	4.3	0	1		2	1	83.26
2	111.98	1	1	20	0	5	40	1	67	1.7	23.18	2	1	1	73	110	70				2	1		188.2	138.53	1	49.7	124.21	1	1	1	1	1	1	5.5	1	1		1	0	100.29
2	106.61	1	1	10	0	5	47	1	79	1.72	26.7	1	0	0	87	120	80				2	1		163.79	77.03	1	73.2	75.18	1	1	1	1	1	0	7.2	1	1	6	0	0	131.02
2	111.98	1	1	10	0	5	40	1	66	1.53	28.19	1	0	0	88	120	70				2	1		162.34	47.91	1	47.5	105.26	1	1	1	1	1	0	6.2	1	1		2	1	74.77
2	123.55	1	1	10	0	5	26	1	68	1.62	25.91	1	0	0	81	110	60				2	1		158.01	83.16	1	48	93.38	1	1	1	1	1	1	4.66	1	1		2	1	79.84
2	119.29	1	1	10	0	5	31	1	48	1.5	21.33	2	1	1	68	120	65				2	1		159.78	87.66	1	46	96.25	1	1	1	1	1	1	4.1	1	1		2	1	83.14
2	117.62	1	1	10	0	5	33	1	50	1.5	22.22	2	1	0	82	120	70				2	1		188.33	144.92	1	49	71.7	1	1	1	1	1	0	6.1	1	1		2	1	72.3
2	99.37	1	1	10	0	5	57	1	82	1.65	30.12	0	0	0	90	130	70				2	1		255.86	136.65	1	43	125.22	1	1	1	0	0	1	4.1	0	1		2	1	76.97
2	115.17	1	1	10	0	5	36	1	62	1.5	27.56	1	0	0	86	120	70				2	1		170.41	94.73	1	47	114.46	1	1	1	1	1	1	3.12	1	1		2	1	73.4
2	102.21	1	1	10	0	5	53	1	48	1.54	20.24	2	1	1	66	120	80				2	1		118.84	77.3	1	55	83.2	1	1	1	1	1	1	4.6	1	0		2	1	83.76
2	92.63	1	1	20	0	5	67	0	76	1.64	28.26	1	0	0	88	122	77	0	0	1	0	0		181	167.58	1	46	101.48	1	1	0	1	1	1	4.8	1	1		2	1	97.44
2	84.55	1	1	20	3	4	80	0	83	1.62	31.63	0	0	0	96	165	105	1	0	0	0	0		197.62	116.32	1	40.8	93.88	1	1	1	1	1	1	5.55	1	1	13.3	1	0	106.25
2	103.12	1	1	20	0	5	51	1	79	1.62	30.1	0	0	0	90	120	80				2	1		173.93	80.72	1	40.4	117.39	1	1	1	1	1	1	5.6	1	1		2	1	84.23
2	112.98	1	1	10	0	5	38	1	56.5	1.6	22.07	2	1	1	70	130	90				2	1		145.9	137	1	48.9	68.3	1	1	1	1	1	1	4.18	1	0		2	1	77.17
2	103.85	1	1	20	0	5	50	1	64	1.6	25	1	1	1	80	120	60				2	1		116.2	141.39	1	42.8	98.3	1	1	1	1	1	1	5.32	1	1		2	1	97.37
2	109.85	1	1	10	0	5	42	1	57.5	1.51	25.22	1	0	1	80	110	70				2	1		171.22	66.56	1	40.4	117.51	1	1	1	1	1	1	3.7	1	1		2	1	80.69
2	113.78	1	1	10	0	5	37	1	59	1.6	23.05	2	1	1	77	100	80				2	1		177.59	103.67	1	45	111.86	1	1	1	1	1	1	3.9	1	1		2	1	77.92
2	96.13	1	1	10	0	5	61	0	70	1.6	27.34	1	0	0	89	120	90				2	1		152.12	58.06	1	41.5	99.01	1	1	1	1	1	1	5.7	1	1		1	0	103.85
2	112.19	1	1	10	0	5	39	1	46	1.52	19.91	2	1	1	69	130	60				2	1		191.08	79.5	1	48.3	86.8	1	1	1	1	1	1	5.6	1	1		2	1	85.54
2	123.79	1	1	10	0	5	25	1	52.2	1.61	20.14	2	1	1	73	100	60				2	1		163.14	83.38	1	52.3	70.1	1	1	1	1	1	1	5.6	1	1		2	1	72.36
2	103.12	1	1	10	0	5	51	1	66	1.56	27.12	1	0	0	83	120	80				2	1		182.83	136.75	1	57.4	98.18	1	1	1	1	1	1	5.6	1	1		2	1	82.49
2	98.87	1	1	10	0	5	57	1	65	1.57	26.37	1	0	0	87	110	80				2	1		158.2	143.48	1	47	82.5	1	1	1	1	1	1	5.32	1	1		2	1	76.79
2	119.52	1	1	10	0	5	30	1	63	1.66	22.86	2	1	1	71	100	70				2	1		197.09	73.77	1	55	58.3	1	1	1	1	1	1	4.3	1	1		2	1	77.04
2	117.85	1	1	10	0	5	32	1	64	1.5	28.44	1	0	0	89	130	70				2	1		165.5	148.2	1	52.6	92.33	1	1	1	1	1	1	5.6	1	1		2	1	95.49
2	105.32	1	1	10	0	5	48	1	58	1.51	25.44	1	0	0	84	120	70				2	1		166.51	148.6	1	48.7	88.09	1	1	1	1	1	1	5.2	1	1		2	1	83.83
2	119.52	1	1	10	0	5	30	1	55.5	1.45	26.4	1	0	0	86	110	80				2	1		202.02	162.91	0	68	101.44	1	1	0	0	0	1	5.5	1	1		2	1	96.88
2	123.79	1	1	20	0	5	25	1	66	1.62	25.15	1	0	0	82	120	80				2	1		232.47	125.67	1	54.2	153.14	0	1	1	0	0	1	5.1	1	1		2	1	71.67
2	102.4	1	1	10	0	5	52	1	53	1.54	22.35	2	1	1	70	110	80				2	1		186.18	142.1	1	56.7	88.3	1	1	1	1	1	0	6.7	1	1		1	0	107.5
2	105.32	1	1	10	0	5	48	1	59	1.66	21.41	2	1	1	71	110	80				2	1		111.5	82.43	1	48.9	75.2	1	1	1	1	1	1	4.22	0	1		2	1	77.68
2	115.39	1	1	10	0	5	35	1	63	1.6	24.61	2	1	1	70	120	80				2	1		128.2	133.32	1	61	83.33	1	1	1	1	1	0	6.6	1	1		2	1	96.21
2	116.2	1	1	10	0	5	34	1	51	1.56	20.96	2	1	1	68	120	60				2	1		188.07	136.13	1	55	78.2	1	1	1	1	1	1	3.9	1	1		2	1	76.22
2	118.68	1	1	10	0	5	31	1	72	1.63	27.1	1	0	0	88	120	80				2	1		171.82	60.42	1	47	112.74	1	1	1	1	1	1	5.6	1	1		2	1	82.42
2	103.85	1	1	10	0	5	50	1	54	1.63	20.32	2	1	1	67	120	70				2	1		196.04	55.28	1	56	78.88	1	1	1	1	1	1	4.2	1	1		2	1	75.96
2	112.19	1	1	10	0	5	39	1	55	1.6	21.48	2	1	1	68	110	70				2	1		195	130	1	59	91.2	1	1	1	1	1	1	4.1	1	1		2	1	60
2	112.19	1	1	10	0	5	39	1	65.5	1.55	27.26	1	0	0	87	120	80				2	1		194.85	144.65	1	49	102.33	1	1	1	1	1	1	4.6	0	0		2	1	74.09
2	98.18	1	1	10	0	5	58	1	74	1.6	28.91	1	0	0	88	120	80				2	1		178.73	115.26	1	57	118.68	1	1	1	1	1	0	6.6	1	1		2	1	75
2	105.32	1	1	10	0	5	48	1	76.1	1.56	31.27	0	0	0	97	130	80				2	1		215.2	183.1	0	34.4	119.2	1	0	0	0	0	0	6.8	0	0		2	1	70.43
2	109.85	1	1	10	0	5	42	1	57.5	1.51	25.22	1	0	0	83	130	70				2	1		171.22	66.56	1	40.4	117.51	1	1	1	1	1	1	3.7	1	1		2	1	80.69
2	119.52	1	1	10	0	5	30	1	90	1.7	31.14	0	0	0	96	120	90				2	1		239	157.55	0	32	175.49	0	0	0	0	0	1	5.2	1	0		2	1	80
2	112.19	1	1	10	0	5	39	1	61	1.62	23.24	2	1	1	79	130	80				2	1		166.36	99.3	1	46	98.3	1	1	1	1	1	1	4.2	1	1		2	1	76.89
2	113.78	1	1	10	0	5	37	1	59	1.6	23.05	2	1	1	77	120	80				2	1		177.59	103.67	1	45	111.86	1	1	1	1	1	1	3.9	1	1		2	1	77.92
2	92.16	1	1	10	0	5	67	0	60	1.65	22.04	2	1	1	70	130	80				2	1		142.3	126.3	1	59.7	68.31	1	1	1	1	1	1	3.9	1	1		1	0	104.54
2	92.16	1	1	10	0	5	67	0	70	1.44	33.76	0	0	0	97	120	90				2	1		244.33	293.08	0	60.8	143.3	0	1	0	0	0	0	7.7	1	1	7.4	0	0	136.63
2	82.36	1	1	20	3	4	83	0	80	1.54	33.73	0	0	0	101	155	95		1	0	0	0		220.09	184.44	0	40.1	140.2	0	1	0	0	0	0	7.1	1	1		2	1	84.9
2	89.61	1	1	10	0	4	71	0	66	1.65	24.24	2	1	1	75	120	80				2	1		161.12	114.12	1	64.1	74.2	1	1	1	1	1	1	4.2	1	1		2	1	70.29
2	90.88	1	1	10	0	5	69	0	48.7	1.52	21.08	2	1	1	66	110	70				2	1		144.2	122.3	1	53.2	69.33	1	1	1	1	1	1	4.4	1	1		2	1	98.3
2	92.16	1	1	10	0	5	67	0	65	1.63	24.46	2	1	1	70	130	90				2	1		142.3	126.3	1	59.7	68.31	1	1	1	1	1	1	3.9	1	1		1	0	104.54
2	111.63	1	1	10	0	5	39	1	50	1.59	19.78	2	1	1	69	100	60				2	1		181.02	60.82	1	50	88.32	1	1	1	1	1	1	4.2	1	1		2	1	55.72
2	100.47	1	1	10	0	5	54	1	49.2	1.56	20.22	2	1	1	68	110	80				2	1		193.36	85.65	1	46	90.33	1	1	1	1	1	1	3.88	1	1		2	1	84.5
2	110.85	1	1	20	0	5	40	1	60	1.62	22.86	2	1	1	73	120	65				2	1		169.52	115.99	1	53	86.3	1	1	1	1	1	1	4.4	1	1		2	1	61.82
2	120.6	1	1	10	0	5	28	1	55.5	1.56	22.81	2	1	1	75	130	80				2	1		174.64	64.1	1	50.5	88.7	1	1	1	1	1	1	4.32	1	1		2	1	81.06
2	118.92	1	1	10	0	5	30	1	60	1.63	22.58	2	1	1	74	130	60				2	1		151.79	72.69	1	54.3	102.95	1	1	1	1	1	1	4.3	1	1		2	1	98.33
2	97.68	1	1	10	0	5	58	1	59.5	1.52	25.75	1	0	1	79	120	80				2	1		172.1	87.88	1	51.2	103.32	1	1	1	1	1	1	5.5	1	1		1	0	113.48
2	107.02	1	1	10	0	5	45	1	58	1.65	21.3	2	1	1	72	120	80				2	1		110.63	126.87	1	41	95.2	1	1	1	1	1	1	4.22	1	1		2	1	72.83
2	103.33	1	1	20	0	5	50	1	62	1.57	25.15	1	0	0	81	120	70				2	1		178.1	124.03	1	50	94.45	1	1	1	1	1	1	4.5	1	1		2	1	78.34
2	101.18	1	1	10	0	5	53	1	80	1.59	31.64	0	0	0	102	119	79	0	0	1	0	0		154.02	248.26	1	40.1	128.88	1	1	0	1	0	1	4.3	1	1		2	1	83.11
2	107.02	1	1	10	0	5	45	1	52	1.51	22.81	2	1	1	69	100	80				2	1		184.8	117.08	1	47	114.38	1	1	1	1	1	1	4.1	1	1		2	1	61.85
2	118.92	1	1	10	0	5	30	1	56	1.6	21.87	2	1	1	70	100	60				2	1		143.98	42.67	1	53	82.45	1	1	1	1	1	1	5.2	1	1		2	1	73.14
2	112.42	1	1	10	0	5	38	1	60	1.66	21.77	2	1	1	69	120	70				2	1		192.07	57.02	1	52.1	85.2	1	1	1	1	1	1	3.8	1	1		2	1	96.6
2	98.37	1	1	10	0	5	57	1	65	1.54	27.41	1	0	0	88	120	80				2	1		160.33	134.1	1	50.8	62.33	1	1	1	1	1	1	5.6	1	1		2	1	80.68
2	122.31	1	1	10	0	5	26	1	56.5	1.66	20.5	2	1	1	70	110	90				2	1		185.89	94.02	1	50.3	99.2	1	1	1	1	1	1	4.4	1	1		2	1	96.14
2	121.45	1	1	10	0	5	27	1	56	1.6	21.87	2	1	1	71	100	70				2	1		188.82	142.56	1	40.9	99.2	1	1	1	1	1	0	6.6	1	1		1	0	109.84
2	112.42	1	1	20	0	5	38	1	63.5	1.59	25.12	1	0	0	81	110	80				2	1		189.3	147.4	1	60.1	97.33	1	1	1	1	1	0	7.3	1	1		1	0	101.49
2	103.33	1	1	10	0	5	50	1	68.8	1.62	26.22	1	0	0	87	125	60				2	1		183.77	148.72	1	69	115.03	1	1	1	1	1	1	4.19	1	1		2	1	72.01
2	113.21	1	1	10	0	5	37	1	53	1.58	21.23	2	1	1	70	90	60				2	1		135.21	81.86	1	47	81.1	1	1	1	1	1	1	3.3	1	1		2	1	70.21
2	115.62	1	1	10	0	5	34	1	53	1.55	22.06	2	1	1	71	110	85				2	1		188.66	144.2	1	65	78.6	1	1	1	1	1	1	4.2	1	1		2	1	69.93
2	121.45	1	1	10	0	5	27	1	64	1.64	23.8	2	1	1	70	120	80				2	1		193.33	133.92	1	40	79.21	1	1	1	1	1	1	4.2	1	1		2	1	62.97
2	119.76	1	1	10	0	5	29	1	54.5	1.56	22.39	2	1	1	74	110	70				2	1		112.69	56.67	1	40	71.36	1	1	1	1	1	1	5.1	1	1		2	1	73.8
2	110.85	1	1	10	0	5	40	1	61	1.62	23.24	2	1	1	73	120	60				2	1		189.19	145.9	1	45	83.07	1	1	1	1	1	1	5.2	1	1		2	1	72.34
2	114.01	1	1	10	0	5	36	1	78.5	1.62	29.91	1	0	0	90	125	60				2	1		191	138.82	1	45	118.24	1	1	1	1	1	0	6.52	1	1		2	1	88
2	111.63	1	1	10	0	5	39	1	50	1.59	19.78	2	1	1	65	120	60				2	1		181.02	60.82	1	50	118.86	1	1	1	1	1	1	4.2	1	1		2	1	55.72
2	110.85	1	1	20	0	5	40	1	60	1.58	24.03	2	1	1	72	130	65				2	1		169.52	115.99	1	53	86.3	1	1	1	1	1	1	4.4	1	1		2	1	61.82
2	101.18	1	1	10	0	5	53	1	79	1.68	27.99	1	0	0	94	122	85	0	0	1	0	0		200.06	240.88	0	34	117.88	1	0	0	0	0	1	4.32	1	1		2	1	75.73
2	120.6	1	1	10	0	5	28	1	55.5	1.56	22.81	2	1	1	75	120	80				2	1		174.64	64.1	1	40.5	88.7	1	1	1	1	1	1	4.32	1	1		2	1	81.06
2	118.92	1	1	10	0	5	30	1	60	1.63	22.58	2	1	1	72	110	60				2	1		151.79	72.69	1	44.3	102.95	1	1	1	1	1	1	4.3	1	1		2	1	88.21
2	114.81	1	1	10	0	5	35	1	66	1.65	24.24	2	1	1	72	120	80				2	1		190	255.2	1	39	97.2	1	0	0	1	0	1	4.2	1	1		2	1	63.79
2	97	1	1	10	0	5	59	1	62	1.53	26.49	1	0	0	86	120	80				2	1		169.2	98.3	1	52.2	99.3	1	1	1	1	1	1	4.9	1	1		2	1	93.3
2	115.62	1	1	10	0	5	34	1	64	1.65	23.51	2	1	1	71	120	80				2	1		190.65	131.62	1	48	98.33	1	1	1	1	1	1	4.4	1	1		2	1	63.79
2	97.68	1	1	10	0	5	58	1	59.5	1.52	25.75	1	0	0	86	120	80				2	1		172.1	87.88	1	51.2	103.32	1	1	1	1	1	1	5.5	1	1		1	0	113.48
2	90.42	1	1	10	0	5	69	0	58.5	1.46	27.44	1	0	0	83	110	80				2	1		193.71	81.53	1	48.4	98.3	1	1	1	1	1	1	5.6	1	1	7.8	1	0	103.29
2	83.7	1	1	20	3	4	80	0	49	1.57	19.88	2	1	1	69	110	70				2	1		162.89	97.51	1	64	79.39	1	1	1	1	1	1	3.1	1	1		2	1	78.41
2	91.06	1	1	10	0	5	68	0	60	1.5	26.67	1	0	0	87	120	80				2	1		194.85	147.32	1	75	98.3	1	1	1	1	1	1	5.8	1	1		2	1	85.54
2	91.06	1	1	10	0	5	68	0	66	1.6	25.78	1	0	0	88	120	80				2	1		198.3	92.3	1	49.1	109.3	1	1	1	1	1	1	5.1	1	1	7.8	2	1	98.3
2	90.42	1	1	10	0	5	69	0	89	1.64	33.09	0	0	0	94	120	80				2	1		193.71	81.53	1	48.4	89.3	1	1	1	1	1	1	5.6	1	1	7.8	1	0	103.29
2	108	1	1	10	0	5	43	1	46.8	1.5	20.8	2	1	1	69	120	90				2	1		155.33	143.45	1	58	98.64	1	1	1	1	1	1	4.22	0	0		2	1	72.95
2	122.56	1	1	10	0	5	25	1	59.5	1.63	22.39	2	1	1	75	110	80				2	1		163.54	74.02	1	47.9	100.84	1	1	1	1	1	1	4.76	1	1		2	1	79.34
2	98.58	1	1	10	0	5	56	1	51	1.53	21.79	2	1	1	72	110	70				2	1		131.81	118.78	1	63	95.8	1	1	1	1	1	1	3.88	1	1		2	1	71.75
2	113.45	1	1	10	0	5	36	1	69	1.6	26.95	1	0	0	87	110	65				2	1		129.72	64.63	1	65	87.1	1	1	1	1	1	1	3.3	1	1		2	1	67.09
2	101.39	1	1	10	0	5	52	1	68	1.63	25.59	1	0	0	81	120	80				2	1		135.76	48.79	1	57	89	1	1	1	1	1	1	4.5	1	1		2	1	96.64
2	100.68	1	1	10	0	5	53	1	58	1.52	25.1	1	0	0	80	120	70				2	1		173.2	123.47	1	68.3	86.3	1	1	1	1	1	1	3.7	1	1		2	1	95.11
2	104.28	1	1	10	0	5	48	1	57.5	1.5	25.56	1	0	0	82	120	70				2	1		287.37	121.72	1	58.7	104.3	1	1	1	0	0	1	5.5	1	1		1	0	110.32
2	95.85	1	1	10	0	5	60	0	63	1.65	23.14	2	1	1	70	110	80				2	1		152.2	144.32	1	64.7	89.3	1	1	1	1	1	1	4.2	0	0		1	0	101.45
2	112.65	1	1	10	0	5	37	1	55.2	1.61	21.3	2	1	1	72	110	70				2	1		191.16	113.3	1	52.7	115.8	1	1	1	1	1	1	3.7	1	1		2	1	91.95
2	102.82	1	1	10	0	5	50	1	68	1.53	29.05	1	0	0	100	120	70				2	1		184.62	119.31	1	42	118.76	1	1	1	1	1	0	6.6	1	1		2	1	83.92
2	120.85	1	1	20	0	5	27	1	66.5	1.56	27.33	1	0	0	89	120	90				2	1		169.18	129.8	1	57.3	105.92	1	1	1	1	1	1	5.5	1	1		2	1	82.53
2	105.01	1	1	10	0	5	47	1	72	1.52	31.16	0	0	0	99	126	82	0	0	1	0	0		223.82	76.09	1	47.4	161.2	0	1	1	0	0	1	5.2	1	1		2	1	75.66
2	115.05	1	1	20	0	5	34	1	55	1.58	22.03	2	1	1	72	100	80				2	1		191.3	134.69	1	46.9	78.3	1	1	1	1	1	1	4.32	1	1		2	1	92.04
2	99.27	1	1	10	0	5	55	1	74	1.55	30.8	0	0	0	93	140	90				1	0		135.63	138.06	1	43.3	104.72	1	1	1	1	1	0	6.6	1	1	8	1	0	100.65
2	120	1	1	10	0	5	28	1	57	1.62	21.72	2	1	1	69	130	80				2	1		162.02	146.47	1	43.1	89.63	1	1	1	1	1	1	4.1	1	1		2	1	71.46
2	100.68	1	1	10	0	5	53	1	69	1.53	29.48	1	0	0	92	120	80				2	1		147.32	144.3	1	80.7	92.3	1	1	1	1	1	0	6.33	1	1		2	1	93.22
2	113.45	1	1	10	0	5	36	1	78	1.8	24.07	2	1	1	70	130	60				2	1		175.35	104.3	1	49	85.1	1	1	1	1	1	1	5.7	0	1		2	1	63.22
2	118.33	1	1	10	0	5	30	1	61.5	1.65	22.59	2	1	1	72	90	70				2	1		186.39	116.29	1	48	78.1	1	1	1	1	1	1	6.6	1	1		2	1	60.39
2	114.25	1	1	10	0	5	35	1	67	1.55	27.89	1	0	0	88	115	75				2	1		192.2	96.99	1	42	90.22	1	1	1	1	1	1	5.66	0	0		2	1	71.37
2	118.33	1	1	10	0	5	30	1	70	1.72	23.66	1	1	1	70	110	60				2	1		137.55	77.55	1	50	92.04	1	1	1	1	1	1	3.1	1	1		2	1	65.3
2	107.25	1	1	10	0	5	44	1	69	1.6	26.95	1	0	0	86	125	85				2	1		195.55	118.76	1	52	89.22	1	1	1	1	1	1	5.1	1	1		2	1	67.86
2	102.1	1	1	10	0	5	51	1	54	1.57	21.91	2	1	1	69	110	80				2	1		194.36	89.95	1	54	88.66	1	1	1	1	1	1	4	1	1		2	1	68.35
2	108.76	1	1	10	0	5	42	1	51	1.56	20.96	2	1	1	70	110	80				2	1		152.4	128.33	1	57	77.2	1	1	1	1	1	1	4.66	1	1		2	1	63.35
2	111.86	1	1	10	0	5	38	1	55	1.52	23.81	2	1	1	72	140	70				2	1		190.22	114.31	1	68	109.26	1	1	1	1	1	1	4.1	1	1		2	1	65.88
2	119.16	1	1	10	0	5	29	1	65	1.64	24.17	2	1	1	75	139	70				2	1		180.14	76.44	1	59	85.85	1	1	1	1	1	1	5.2	1	1		2	1	77.71
2	107.25	1	1	10	0	5	44	1	60	1.52	25.97	1	0	0	88	120	85				2	1		177.99	144.24	1	55.5	85.64	1	1	1	1	1	1	6.6	1	1		1	0	109.03
2	96.52	1	1	28	0	5	59	1	59.5	1.5	26.44	1	0	0	88	130	80				2	1		184.72	101.44	1	40.9	103.53	1	1	1	1	1	1	5.6	1	1		2	1	80.82
2	122.56	1	1	10	0	5	25	1	59.5	1.56	24.45	2	1	1	68	120	80				2	1		163.54	74.02	1	47.9	100.84	1	1	1	1	1	1	4.76	1	1		2	1	79.34
2	110.3	1	1	20	0	5	40	1	68	1.73	22.72	2	1	1	75	120	80				2	1		159	148	1	45.3	84.1	1	1	1	1	1	1	3.76	0	0		2	1	93
2	122.56	1	1	10	0	5	25	1	59	1.72	19.94	2	1	1	70	110	70				2	1		158.4	128.63	1	48.3	84.37	1	1	1	1	1	1	5.2	1	0		2	1	80.95
2	117.5	1	1	10	0	5	31	1	56.5	1.68	20.02	2	1	1	76	110	60				2	1		173	143.22	1	64	92.86	1	1	1	1	1	1	3.7	0	0		2	1	82
2	120	1	1	10	0	5	28	1	66.5	1.68	23.56	2	1	1	76	120	80				2	1		176	108.38	1	49	105.32	1	1	1	1	1	1	4.3	0	0		2	1	92
2	92.54	1	1	10	0	5	65	0	72.2	1.6	28.2	1	0	0	80	110	80				2	1		187.57	146.32	1	57.8	90.51	1	1	1	1	1	1	4.2	1	1		2	1	92.96
2	92.54	1	1	20	0	5	65	0	68.5	1.58	27.44	1	0	0	89	120	80				2	1		200.02	150.93	0	42.6	97.3	1	1	0	0	0	0	7.2	1	1	7.9	0	0	136.48
2	93.85	1	1	10	0	5	63	0	57	1.63	21.45	2	1	1	71	120	45				2	1		177.31	149.6	1	50	95.39	1	1	1	1	1	1	3.44	1	1		2	1	81.7
2	101.6	1	1	20	0	5	51	1	63	1.52	27.27	1	0	0	87	150	100				2	1		190.43	75.44	1	52.3	103.3	1	1	1	1	1	1	5.66	1	1		2	1	86.06
2	109	1	1	10	0	5	41	1	60	1.69	21.01	2	1	1	72	120	70				2	1		147.35	87.78	1	57	72.79	1	1	1	1	1	1	3.99	1	1		2	1	74.02
2	120.26	1	1	10	0	5	27	1	57	1.62	21.72	2	1	1	69	110	70				2	1		174.35	75.3	1	44.9	114.39	1	1	1	1	1	1	3.8	1	1		2	1	74.06
2	122.82	1	1	10	0	5	24	1	60	1.6	23.44	2	1	1	71	110	60				2	1		185.1	112.3	1	44	92.3	1	1	1	1	1	1	3.8	0	0		2	1	84.07
2	98.79	1	1	20	0	5	55	1	50	1.54	21.08	2	1	1	68	120	90				2	1		188.44	144.3	1	45.3	76.8	1	1	1	1	1	1	4.2	1	1		2	1	88.3
2	114.49	1	1	20	0	5	34	1	79	1.58	31.65	0	0	0	97	110	80				2	1		139.77	135.93	1	47.7	74.88	1	1	1	1	1	1	3.2	1	1		2	1	74.34
2	107.48	1	1	10	0	5	43	1	68	1.6	26.56	1	0	0	87	120	70				2	1		165.64	140.09	1	42	91.62	1	1	1	1	1	1	4.4	1	1		2	1	83.52
2	110.54	1	1	10	0	5	39	1	53	1.59	20.96	2	1	1	70	100	70				2	1		174.05	104.64	1	45.3	107.82	1	1	1	1	1	1	3.6	1	1		2	1	81.74
2	96.73	1	1	10	0	5	58	1	58.5	1.5	26	1	0	0	86	120	90				2	1		188.34	145.44	1	46.55	112.7	1	1	1	1	1	1	4.45	1	1		2	1	88.3
2	109	1	1	10	0	5	41	1	55	1.6	21.48	2	1	1	71	110	80				2	1		170.31	49.05	1	59.8	120.7	1	1	1	1	1	1	3.8	1	1		2	1	81.35
2	116.11	1	1	10	0	5	32	1	63	1.55	26.22	1	0	0	88	110	80				2	1		189.48	144.99	1	44	116.48	1	1	1	1	1	1	4.4	1	1		2	1	90.38
2	103.04	1	1	20	0	5	49	1	68	1.62	25.91	1	0	1	72	130	70				2	1		170.17	89.2	1	46.7	65.2	1	1	1	1	1	0	6.6	1	1		1	0	115.37
2	119.42	1	1	10	0	5	28	1	54	1.59	21.36	2	1	1	71	100	60				2	1		179.57	128.62	1	59.9	93.73	1	1	1	1	1	0	6.7	1	1		2	1	91.36
2	97.41	1	1	10	0	5	57	1	80	1.55	33.3	0	0	0	106	140	90				1	0		244.1	294.98	0	40.1	132.2	0	1	0	0	0	0	7.3	1	1		1	0	121.4
2	99.49	1	1	10	0	5	54	1	74	1.58	29.64	1	0	0	86	145	90				1	0		235.78	111.7	1	62.5	120.42	1	1	1	0	0	1	5.7	1	1		2	1	90.5
2	120.26	1	1	10	0	5	27	1	59	1.62	22.48	2	1	1	71	130	70				2	1		176.96	134.61	1	46	104.04	1	1	1	1	1	1	4.23	1	1		2	1	68.04
2	117.75	1	1	10	0	5	30	1	63.5	1.6	24.8	2	1	1	73	110	90				2	1		161.53	101.38	1	53	108.25	1	1	1	1	1	1	4.66	1	1		2	1	85.23
2	102.32	1	1	10	0	5	50	1	58	1.61	22.38	2	1	1	71	130	70				2	1		155.5	53.42	1	42	102.82	1	1	1	1	1	1	4.1	1	1		2	1	83.2
2	98.79	1	1	10	0	5	55	1	85	1.68	30.12	0	0	1	72	126	84	0	0	1	0	0		194.6	100.34	1	43	121.3	1	1	1	1	1	1	4.52	1	1		2	1	67.22
2	116.11	1	1	10	0	5	32	1	59	1.63	22.21	2	1	1	70	120	70				2	1		177	99	1	40	77.2	1	1	1	1	1	1	4.8	0	1		2	1	87
2	110.54	1	1	10	0	5	39	1	66	1.65	24.24	2	1	1	78	110	60				2	1		189.12	105.66	1	42	65.55	1	1	1	1	1	1	5.1	1	1		2	1	65.46
2	120.26	1	1	10	0	5	27	1	54	1.6	21.09	2	1	1	76	110	80				2	1		193.23	140.54	1	43	118.12	1	1	1	1	1	1	5.7	1	1		2	1	51.23
2	118.59	1	1	10	0	5	29	1	54.5	1.57	22.11	2	1	1	69	110	60				2	1		146.2	94.95	1	49	88.2	1	1	1	1	1	1	3.1	0	0		2	1	71.6
2	107.48	1	1	10	0	5	43	1	60	1.62	22.86	2	1	1	70	120	80				2	1		168.59	113.74	1	48	107.84	1	1	1	1	1	1	4.4	1	1		2	1	95.86
2	94.71	1	1	10	0	5	61	0	67	1.63	25.22	1	0	0	85	120	75				2	1		193.16	141.16	1	44	92.89	1	1	1	1	1	1	5.2	1	1		2	1	84.47
2	110.54	1	1	20	0	5	39	1	56.3	1.58	22.55	2	1	1	68	120	70				2	1		157.28	140.26	1	57.3	82.2	1	1	1	1	1	1	3.4	1	1		2	1	89.53
2	104.5	1	1	10	0	5	47	1	63	1.58	25.24	1	0	0	82	130	70				2	1		199.32	98.66	1	44.1	97.32	1	1	1	1	1	1	4.5	0	1		2	1	87.31
2	101.6	1	1	20	0	5	51	1	63	1.52	27.27	1	0	0	87	122	79	0	0	1	0	0		190.43	75.44	1	52.3	103.3	1	1	1	1	1	1	5.66	1	1		2	1	86.06
2	106.73	1	1	10	0	5	44	1	63	1.58	25.24	1	0	0	82	120	80				2	1		199.64	98.58	1	55	98.32	1	1	1	1	1	1	5.32	0	0		2	1	85.33
2	109	1	1	10	0	5	41	1	60	1.58	24.03	2	1	1	70	100	70				2	1		147.35	87.78	1	57	72.79	1	1	1	1	1	1	3.99	1	1		2	1	74.02
2	112.1	1	1	10	0	5	37	1	61.5	1.61	23.73	2	1	1	73	110	80				2	1		166.32	123.69	1	43.2	89.32	1	1	1	1	1	1	3.89	0	1		2	1	83.28
2	111.32	1	1	10	0	5	38	1	64.5	1.58	25.84	1	0	0	85	110	80				2	1		193.17	144.02	1	57.5	89.32	1	1	1	1	1	1	5.2	1	1		2	1	99.26
2	117.75	1	1	10	0	5	30	1	68	1.62	25.91	1	0	0	86	120	70				2	1		189.32	145.88	1	56	91.18	1	1	1	1	1	1	3.3	1	1		2	1	75.99
2	114.49	1	1	10	0	5	34	1	64	1.62	24.39	2	1	1	70	120	60				2	1		184.2	113.2	1	43	93.2	1	1	1	1	1	1	3.9	0	0		2	1	84
2	98.1	1	1	20	0	5	56	1	55	1.55	22.89	2	1	1	68	130	80				2	1		163.2	142.2	1	44	78.3	1	1	1	1	1	1	4.2	1	1		2	1	86.2
2	114.49	1	1	10	0	5	34	1	60	1.6	23.44	2	1	1	72	120	60				2	1		185.1	112.3	1	44	92.3	1	1	1	1	1	1	3.8	0	0		2	1	84.07
2	121.96	1	1	10	0	5	25	1	87	1.67	31.2	0	0	0	96	120	90				2	1		187	179.33	1	38	110.04	1	0	0	1	0	1	4.7	0	0		2	1	97
2	98.79	1	1	20	0	5	55	1	50	1.54	21.08	2	1	1	71	110	90				2	1		188.44	144.3	1	45.3	76.8	1	1	1	1	1	1	4.2	1	1		2	1	88.3
2	116.11	1	1	10	0	5	32	1	75	1.79	23.41	2	1	1	73	100	80				2	1		153.67	144.47	1	49	107.78	1	1	1	1	1	1	3.4	1	1		2	1	85.21
2	120.26	1	1	10	0	5	27	1	80	1.77	25.54	1	0	0	82	110	60				2	1		168	82	1	55	96.6	1	1	1	1	1	1	3.1	1	1		2	1	81
2	111.32	1	1	10	0	5	38	1	71	1.74	23.45	2	1	1	70	130	78				2	1		150	92	1	59	72.6	1	1	1	1	1	0	6.6	0	0		1	0	101
2	117.75	1	1	10	0	5	30	1	74	1.64	27.51	1	0	0	88	110	60				2	1		176	148.2	1	41	82.29	1	1	1	1	1	1	5.8	1	0		1	0	103
2	105.24	1	1	10	0	5	46	1	79	1.73	26.4	1	0	0	91	118	79	0	0	1	0	0		142	138.2	1	42.3	106.3	1	1	1	1	1	1	5.28	0	0		2	1	91
2	90.8	1	1	20	0	5	67	0	60	1.63	22.58	2	1	1	73	120	70				2	1		188.3	133.45	1	53.3	108.31	1	1	1	1	1	1	4.3	1	1		2	1	88.3
2	82.88	1	1	10	3	4	80	0	65	1.61	25.08	1	0	0	80	100	80				2	1		181.3	144.83	1	48.2	97.3	1	1	1	1	1	1	5.4	1	1		1	0	102.42
2	82.88	1	1	10	3	4	80	0	58.3	1.6	22.77	2	1	1	71	110	80				2	1		151.2	133.2	1	55	86.3	1	1	1	1	1	0	6.8	1	1		1	0	100.82
2	90.8	1	1	20	0	5	67	0	60	1.6	23.44	2	1	1	73	130	70				2	1		188.3	133.45	1	53.3	88.31	1	1	1	1	1	1	4.3	1	1		2	1	88.3
2	100.41	1	1	10	0	5	52	1	72	1.65	26.45	1	0	1	79	100	80				2	1		191.94	147.03	1	59	81.52	1	1	1	1	1	1	4.6	1	1		2	1	97.67
2	113.15	1	1	10	0	5	35	1	68	1.55	28.3	1	0	0	90	120	70				2	1		188.98	133.98	1	36.5	125.68	1	0	1	1	0	1	4.2	1	1		2	1	92.81
2	119.69	1	1	10	0	5	27	1	68	1.6	26.56	1	0	0	86	120	70				2	1		197.64	69.31	1	64	119.78	1	1	1	1	1	1	5.1	1	1		2	1	66.59
2	101.12	1	1	10	0	5	51	1	65.5	1.67	23.49	2	1	1	74	120	70				2	1		179.55	138.87	1	46	95.2	1	1	1	1	1	1	4.1	1	1		2	1	86.02
2	109.24	1	1	20	0	5	40	1	50	1.56	20.55	2	1	1	69	110	70				2	1		195.11	145.22	1	62.7	105.88	1	1	1	1	1	1	3.2	1	1		2	1	87.56
2	110.79	1	1	10	0	5	38	1	57	1.6	22.27	2	1	1	72	100	70				2	1		189.63	120.68	1	54.9	98.2	1	1	1	1	1	1	3.2	1	1		2	1	77.12
2	119.69	1	1	20	0	5	27	1	64.5	1.57	26.17	1	0	0	86	110	70				2	1		181.88	96.89	1	62.2	90.22	1	1	1	1	1	1	5.32	1	1		2	1	89.62
2	113.94	1	1	10	0	5	34	1	53	1.55	22.06	2	1	1	70	90	70				2	1		145.2	108.65	1	47.9	79.2	1	1	1	1	1	1	4.1	1	1		2	1	85.14
2	118.85	1	1	10	0	5	28	1	61	1.55	25.39	1	0	0	82	120	60				2	1		172.3	63.13	1	47.2	112.47	1	1	1	1	1	1	5.3	1	1		2	1	79.53
2	102.55	1	1	10	0	5	49	1	62.5	1.62	23.81	2	1	1	70	120	80				2	1		159.89	112.56	1	56.9	100.48	1	1	1	1	1	1	3.6	1	1		2	1	83.62
2	92.94	1	1	10	0	5	63	0	71.5	1.61	27.58	1	0	0	102	124	83	0	0	1	0	0		205.11	186.8	1	61	126.75	1	1	0	0	0	0	7.3	1	1	6.2	0	0	132.53
2	101.83	1	1	10	0	5	50	1	54	1.55	22.48	2	1	1	69	100	70				2	1		159.42	58	1	42	78.3	1	1	1	1	1	1	4.1	1	1		2	1	83.25
2	101.12	1	1	10	0	5	51	1	62	1.52	26.84	1	0	0	87	130	70				2	1		152	146	1	55.3	92.3	1	1	1	1	1	1	4.4	0	1		2	1	80.05
2	114.75	1	1	10	0	5	33	1	66	1.68	23.38	2	1	1	68	110	60				2	1		199.69	61.46	1	48.9	88.5	1	1	1	1	1	1	2.9	1	1		2	1	82.97
2	104.73	1	1	10	0	5	46	1	61.5	1.54	25.93	1	0	0	84	110	80				2	1		186.32	99.01	1	54.4	98.33	1	1	1	1	1	1	5.1	1	1		2	1	74.48
2	110.01	1	1	10	0	5	39	1	51.1	1.54	21.55	2	1	1	70	110	80				2	1		190.08	137.16	1	47.1	95.2	1	1	1	1	1	1	4.1	1	1		2	1	76.9
2	118.02	1	1	10	0	5	29	1	70	1.56	28.76	1	0	0	89	130	70				2	1		167.49	87.56	1	31.4	118.58	1	0	1	1	0	0	6.8	1	1		2	1	98.38
2	99.01	1	1	10	0	5	54	1	65	1.61	25.08	1	0	0	82	130	70				2	1		190.13	117.2	1	60.6	89.33	1	1	1	1	1	1	5.5	1	1		2	1	75.94
2	120.53	1	1	10	0	5	26	1	67	1.56	27.53	1	0	0	88	120	90				2	1		176.95	97.62	1	69.7	87.73	1	1	1	1	1	0	6.2	0	0		2	1	85.16
2	113.94	1	1	10	0	5	34	1	63	1.58	25.24	1	0	0	82	110	70				2	1		178.32	146.2	1	41	92.33	1	1	1	1	1	1	5.44	0	0		2	1	77.63
2	117.19	1	1	10	0	5	30	1	59	1.65	21.67	2	1	1	73	130	80				2	1		193.3	209.42	1	68	83.42	1	1	0	1	1	1	4.32	1	1		2	1	69.28
2	112.35	1	1	10	0	5	36	1	65	1.67	23.31	2	1	1	72	110	70				2	1		174.22	89.13	1	42	78.3	1	1	1	1	1	1	3.9	1	0		2	1	56.84
2	103.27	1	1	10	0	5	48	1	65.5	1.56	26.91	1	0	0	87	120	80				2	1		187.21	148.02	1	47	107.11	1	1	1	1	1	0	6.77	1	1		2	1	72.8
2	117.19	1	1	10	0	5	30	1	59	1.63	22.21	2	1	0	80	110	70				2	1		193.39	107.3	1	57.7	67.23	1	1	1	1	1	1	4.1	1	1		2	1	78.13
2	118.02	1	1	10	0	5	29	1	61	1.51	26.75	1	0	0	87	115	70				2	1		142.18	142.35	1	56.2	97.51	1	1	1	1	1	1	5.7	1	1		2	1	92.39
2	113.15	1	1	10	0	5	35	1	68	1.55	28.3	1	0	0	90	120	70				2	1		188.98	133.98	1	36.5	125.68	1	0	1	1	0	1	4.2	1	1		2	1	92.81
2	111.57	1	1	10	0	5	37	1	75	1.7	25.95	1	0	0	83	120	70				2	1		143	144.27	1	55	94.15	1	1	1	1	1	1	5.42	0	0		2	1	87
2	92.94	1	1	10	0	5	63	0	75.5	1.63	28.42	1	0	0	90	130	80				2	1		192.61	149.29	1	52.9	109.85	1	1	1	1	1	1	5.5	1	1		2	1	88.15
2	90.37	1	1	10	0	5	67	0	71.8	1.65	26.37	1	0	0	88	120	80				2	1		180.59	122.42	1	81.6	94.51	1	1	1	1	1	1	5.2	0	1		2	1	74.34
2	91.65	1	1	10	0	5	65	0	78	1.65	28.65	1	0	0	90	130	80				2	1		235.02	79.37	1	71.1	98.05	1	1	1	0	0	0	6.2	1	1		2	1	66.89
2	91.65	1	1	10	0	5	65	0	70	1.54	29.52	1	0	0	90	120	80				2	1		233.11	149.79	1	78.6	112.3	1	1	1	0	0	1	5.7	1	1		2	1	90.89
2	83.06	1	1	10	3	4	79	0	65	1.56	26.71	1	0	0	88	100	50				2	1		183.32	138.97	1	43.4	112.13	1	1	1	1	1	1	5.6	1	0		2	1	65.34
2	82.48	1	1	10	3	4	80	0	60	1.6	23.44	2	1	1	72	120	80				2	1		181.91	92.49	1	57	106.41	1	1	1	1	1	1	4.1	1	1		2	1	81.36
2	104.97	1	1	10	0	5	45	1	50	1.58	20.03	2	1	1	70	120	80				2	1		198.7	109.36	1	53	109.83	1	1	1	1	1	1	4.1	1	1		2	1	72.15
2	117.46	1	1	10	0	5	29	1	75	1.81	22.89	2	1	1	78	120	80				2	1		232.18	73.37	1	54	103.51	1	1	1	0	0	1	3.9	1	0		2	1	69.59
2	111.04	1	1	10	0	5	37	1	55	1.62	20.96	2	1	0	85	120	80				2	1		197.11	138.7	1	45	124.37	1	1	1	1	1	0	7.1	1	1		2	1	76.45
2	101.35	1	1	10	0	5	50	1	65	1.66	23.59	2	1	1	70	130	85				2	1		198.29	144.39	1	43	84.41	1	1	1	1	1	1	5.2	1	1		2	1	70.21
2	111.04	1	1	10	0	5	37	1	74.5	1.58	29.84	1	0	0	91	118	70				2	1		166	178.3	1	41.33	109.11	1	1	0	1	0	1	5.57	1	1		2	1	83
2	106.46	1	1	10	0	5	43	1	65.4	1.59	25.87	1	0	0	81	100	80				2	1		155.39	149.2	1	44.3	94.3	1	1	1	1	1	1	5.3	1	1		2	1	99.53
2	99.24	1	1	10	0	5	53	1	87	1.62	33.15	0	0	0	103	120	82				2	1		239	180	0	34	169	0	0	0	0	0	1	5.2	1	1		1	0	103
2	110.26	1	1	10	0	5	38	1	68	1.64	25.28	1	0	0	82	110	70				2	1		199	78	1	58	93.3	1	1	1	1	1	1	4.2	1	1		2	1	77
2	99.24	1	1	10	0	5	53	1	82	1.6	32.03	0	0	0	101	110	90				2	1		264	170.2	0	33.2	147.2	0	0	0	0	0	1	5.6	1	1		2	1	81
2	102.78	1	1	10	0	5	48	1	71	1.54	29.94	1	0	0	93	120	80				2	1		180.69	92.88	1	42.7	119.41	1	1	1	1	1	1	4.46	1	1		2	1	78.38
2	97.17	1	1	10	0	5	56	1	63	1.62	24.01	2	1	0	82	130	70				2	1		195.2	144.3	1	40.5	99.3	1	1	1	1	1	1	4.4	1	1		2	1	99.34
2	110.26	1	1	10	0	5	38	1	62	1.53	26.49	1	0	1	69	110	70				2	1		182.79	113.12	1	65.1	85.07	1	1	1	1	1	1	3.7	1	1		2	1	86.25
2	118.29	1	1	10	0	5	28	1	68	1.64	25.28	1	0	0	81	110	70				2	1		131.65	76.17	1	53.1	83.32	1	1	1	1	1	1	4.1	1	1		2	1	75.54
2	107.21	1	1	10	0	5	42	1	58	1.57	23.53	2	1	1	66	100	80				2	1		173.26	65.81	1	48.6	111.5	1	1	1	1	1	1	3.12	1	1		2	1	91.75
2	111.82	1	1	10	0	5	36	1	60	1.56	24.65	2	1	1	68	110	60				2	1		180.35	95.52	1	53	88.2	1	1	1	1	1	1	3.32	1	1		2	1	70.31
2	111.82	1	1	10	0	5	36	1	52	1.62	19.81	2	1	1	68	110	60				2	1		114.2	112.65	1	50.9	91.17	1	1	1	1	1	1	3.18	1	1		2	1	73.4
2	108.73	1	1	10	0	5	40	1	51	1.56	20.96	2	1	1	71	90	70				2	1		159.22	117.04	1	60.6	75.55	1	1	1	1	1	1	4.1	1	1		2	1	77.83
2	114.2	1	1	10	0	5	33	1	61.5	1.63	23.15	2	1	1	72	120	70				2	1		172.53	146.87	1	54	79.1	1	1	1	1	1	1	5.7	1	1		2	1	66.04
2	114.2	1	1	10	0	5	33	1	58	1.66	21.05	2	1	1	70	120	60				2	1		171.08	117.8	1	43	94.2	1	1	1	1	1	1	3.12	1	1		2	1	75.27
2	114.2	1	1	10	0	5	33	1	60	1.68	21.26	2	1	1	69	120	80				2	1		176.56	67.92	1	55	81.6	1	1	1	1	1	1	3.8	1	1		2	1	84.38
2	105.71	1	1	10	0	5	44	1	72	1.64	26.77	1	0	0	86	120	80				2	1		152.18	93.92	1	55	98.4	1	1	1	1	1	1	5.6	1	1		2	1	77.78
2	112.61	1	1	10	0	5	35	1	60	1.65	22.04	2	1	1	72	110	70				2	1		186.26	122.94	1	40	92.33	1	1	1	1	1	1	4.1	0	1		2	1	72.39
2	113.41	1	1	10	0	5	34	1	64	1.6	25	1	1	0	81	125	70				2	1		154	144	1	51	95.2	1	1	1	1	1	1	5.3	0	1		2	1	90
2	107.21	1	1	10	0	5	42	1	63	1.56	25.89	1	0	0	86	120	80				2	1		191	134	1	57	97.2	1	1	1	1	1	1	5.23	0	1		2	1	72
2	119.12	1	1	10	0	5	27	1	65	1.63	24.46	2	1	1	70	110	70				2	1		192	134	1	58	87.23	1	1	1	1	1	1	4.42	1	1		2	1	80
2	110.26	1	1	10	0	5	38	1	46	1.52	19.91	2	1	1	68	120	60				2	1		128	94	1	50	59.2	1	1	1	1	1	1	3.52	0	1		2	1	69
2	119.96	1	1	10	0	5	26	1	67.5	1.68	23.92	2	1	0	84	120	80				2	1		173	117	1	55	72.2	1	1	1	1	1	1	4.23	1	1		2	1	79
2	108.73	1	1	10	0	5	40	1	52.5	1.55	21.85	2	1	1	68	110	70				2	1		112	66	1	45	53.8	1	1	1	1	1	1	4.1	1	1		2	1	80
2	115.82	1	1	10	0	5	31	1	63	1.63	23.71	2	1	1	70	120	80				2	1		126	62	1	53	60.6	1	1	1	1	1	1	4.1	1	1		2	1	80
2	115.82	1	1	10	0	5	31	1	65	1.56	26.71	1	0	0	86	120	80				2	1		158	82	1	42	99.6	1	1	1	1	1	1	5.5	1	1		2	1	75
2	119.12	1	1	10	0	5	27	1	65.5	1.56	26.91	1	0	0	87	120	70				2	1		190.2	142	1	40	95.6	1	1	1	1	1	0	6.23	1	1		2	1	88
2	108.73	1	1	10	0	5	40	1	59	1.55	24.56	2	1	1	70	110	70				2	1		172	64	1	54	88.2	1	1	1	1	1	1	4.1	1	1		2	1	75
2	111.04	1	1	10	0	5	37	1	65	1.6	25.39	1	0	0	82	130	70				2	1		154	68	1	55	105.4	1	1	1	1	1	1	4.66	1	1		2	1	88
2	113.41	1	1	10	0	5	34	1	62	1.5	27.56	1	0	0	86	120	60				2	1		186	221.83	1	37	104.63	1	0	0	1	0	0	6.1	1	1		2	1	98
2	107.21	1	1	10	0	5	42	1	54	1.65	19.83	2	1	1	71	110	70				2	1		172.66	57.21	1	49	112.22	1	1	1	1	1	1	3.1	1	1		2	1	73
2	118.29	1	1	10	0	5	28	1	64.5	1.65	23.69	2	1	1	74	110	70				2	1		149.75	70.77	1	41	104.6	1	1	1	1	1	1	5.7	1	1		2	1	62.71
2	110.26	1	1	10	0	5	38	1	62.5	1.58	25.04	1	0	0	82	120	60				2	1		187	72.3	1	54	98.23	1	1	1	1	1	1	5.1	0	0		2	1	98
2	104.97	1	1	20	0	5	45	1	73	1.52	31.6	0	0	0	98	120	70				2	1		218.2	157.32	0	38	102.5	1	0	0	0	0	0	6.8	1	1		2	1	90
2	113.41	1	1	20	0	5	34	1	60	1.52	25.97	1	0	0	86	115	70				2	1		193	84.34	1	46	88.23	1	1	1	1	1	1	5.23	1	1		2	1	88
2	111.82	1	1	10	0	5	36	1	61.5	1.63	23.15	2	1	1	74	130	70				2	1		106	111.79	1	40	93.4	1	1	1	1	1	1	4.55	1	1		2	1	79
2	112.61	1	1	10	0	5	35	1	56	1.59	22.15	2	1	1	71	120	80				2	1		182	72.2	1	77	78.32	1	1	1	1	1	1	4.2	0	1		2	1	89
2	102.06	1	1	10	0	5	49	1	69	1.62	26.29	1	0	0	87	120	80				2	1		192	83.37	1	41.8	104.33	1	1	1	1	1	1	5.2	1	1		2	1	94
2	111.04	1	1	10	0	5	37	1	68.5	1.62	26.1	1	0	0	84	120	80				2	1		181	143.55	1	47	103.29	1	1	1	1	1	1	5.2	1	1		2	1	72
2	109.49	1	1	10	0	5	39	1	65	1.53	27.77	1	0	0	90	120	70				2	1		212	154.3	0	44.3	106.84	1	1	0	0	0	0	6.2	0	1		2	1	83
2	111.04	1	1	10	0	5	37	1	58.5	1.68	20.73	2	1	1	76	115	80				2	1		188.87	139.66	1	57	66.9	1	1	1	1	1	1	3.34	1	1		2	1	74.11
2	109.49	1	1	10	0	5	39	1	64	1.63	24.09	2	1	1	72	120	80				2	1		196	144	1	45.3	100.2	1	1	1	1	1	0	6.6	0	1		2	1	92
2	108.73	1	1	10	0	5	40	1	52.5	1.56	21.57	2	1	1	69	110	70				2	1		188	149	1	42	100.2	1	1	1	1	1	1	4.1	1	1		2	1	72
2	106.46	1	1	10	0	5	43	1	64	1.48	29.22	1	0	0	92	122	79	0	0	1	0	0		262	78	1	48	98.3	1	1	1	0	0	1	5.4	1	1		2	1	88
2	119.12	1	1	10	0	5	27	1	52.7	1.62	20.08	2	1	1	70	110	80				2	1		189.6	146.2	1	70.7	78.3	1	1	1	1	1	0	7.2	1	1		1	0	125.14
2	105.71	1	1	10	0	5	44	1	71	1.59	28.08	1	0	0	89	124	84	0	0	1	0	0		234	159.73	0	46	119.2	1	1	0	0	0	1	5.2	1	1		2	1	87
2	106.46	1	1	10	0	5	43	1	62	1.55	25.81	1	0	0	86	110	80				2	1		160.37	136.1	1	52	101.15	1	1	1	1	1	1	4.8	1	1		2	1	92.06
2	96.49	1	1	10	0	5	57	1	83	1.7	28.72	1	0	0	90	126	83	0	0	1	0	0		173.21	141.04	1	48.6	96.4	1	1	1	1	1	0	6.66	1	1		1	0	107.94
2	111.82	1	1	10	0	5	36	1	80	1.72	27.04	1	0	0	93	110	80				2	1		184.91	183.23	1	34	114.26	1	0	0	1	0	1	5.6	1	1		2	1	97.1
2	111.04	1	1	10	0	5	37	1	55	1.62	20.96	2	1	1	66	120	80				2	1		197.11	138.7	1	45	124.37	1	1	1	1	1	1	4.4	1	1		2	1	76.45
2	117.46	1	1	10	0	5	29	1	77	1.71	26.33	1	0	0	92	120	80				2	1		192	114	1	43.3	125.9	1	1	1	1	1	1	5.6	1	0		2	1	84
2	110.26	1	1	20	0	5	38	1	65	1.65	23.88	1	1	1	74	120	70				2	1		170.74	79.53	1	48	106.83	1	1	1	1	1	1	4.5	1	1		2	1	82
2	95.14	1	1	20	0	5	59	1	87.5	1.75	28.57	1	0	0	93	124	79	0	0	1	0	0		204	155.24	0	48	124.95	1	1	0	0	0	1	5.2	0	0		2	1	93
2	101.35	1	1	10	0	5	50	1	67	1.66	24.31	2	1	1	74	125	85				2	1		188.3	142.3	1	42	118.2	1	1	1	1	1	1	6.2	1	1		2	1	70
2	93.16	1	1	10	0	5	62	0	86	1.65	31.59	0	0	0	101	140	90				1	0		121.2	119.2	1	41	66.2	1	1	1	1	1	1	4.6	0	0		2	1	92
2	107.21	1	1	10	0	5	42	1	72	1.65	26.45	1	0	0	93	120	80				2	1		117.2	143.2	1	29	118.2	1	0	1	1	0	1	5.2	0	0	5.4	2	1	90
2	106.46	1	1	10	0	5	43	1	69	1.62	26.29	1	0	0	88	110	85				2	1		173.2	117.3	1	46	105.8	1	1	1	1	1	1	5.5	1	1		1	0	104
2	101.35	1	1	10	0	5	50	1	65	1.66	23.59	2	1	1	69	115	85				2	1		198.29	144.39	1	43	84.41	1	1	1	1	1	1	5.2	1	1		2	1	70.21
2	115.01	1	1	10	0	5	32	1	84.5	1.66	30.66	0	0	0	101	100	80				2	1		122	118	1	40	58.4	1	1	1	1	1	1	4.6	0	0		2	1	71
2	106.46	1	1	10	0	5	43	1	68	1.62	25.91	1	0	0	91	120	85				2	1		181	128.72	1	57	118.26	1	1	1	1	1	1	5.5	1	1		1	0	104
2	112.61	1	1	10	0	5	35	1	61.5	1.51	26.97	1	0	0	92	110	70				2	1		188.3	146.5	1	54.22	66.3	1	1	1	1	1	1	5.2	1	1		2	1	83
2	103.51	1	1	10	0	5	47	1	73.5	1.68	26.04	1	0	0	90	120	90				2	1		194.2	144	1	55.3	129.9	1	1	1	1	1	1	5.32	1	1		2	1	79
2	108.73	1	1	10	0	5	40	1	68	1.6	26.56	1	0	0	93	110	80				2	1		184	88	1	40	106.2	1	1	1	1	1	1	5.7	1	1		2	1	76
2	105.71	1	1	10	0	5	44	1	81.5	1.79	25.44	1	0	0	83	110	80				2	1		161	104.37	1	44	96.13	1	1	1	1	1	1	5.1	1	0		2	1	97.3
2	95.14	1	1	10	0	5	59	1	65	1.62	24.77	2	1	1	72	110	80				2	1		192.3	141.73	1	44	97.65	1	1	1	1	1	0	6.9	0	0		1	0	109
2	109.49	1	1	10	0	5	39	1	74	1.59	29.27	1	0	0	98	120	85				2	1		251	164.69	0	55	109.22	1	1	0	0	0	0	7.1	0	0		1	0	109
2	111.82	1	1	10	0	5	36	1	66.5	1.67	23.84	2	1	1	70	120	80				2	1		194	113.04	1	45	96.69	1	1	1	1	1	1	4	0	0		2	1	90
2	112.61	1	1	20	0	5	35	1	76.5	1.67	27.43	1	0	0	88	110	80				2	1		161	118.97	1	51	106.21	1	1	1	1	1	0	6.1	1	0		2	1	90
2	115.82	1	1	24	0	5	31	1	72.5	1.71	24.79	2	1	1	70	100	80				2	1		192	142.68	1	58	105.22	1	1	1	1	1	1	4.1	1	1		2	1	95
2	109.49	1	1	20	0	5	39	1	65	1.62	24.77	2	1	1	70	120	80				2	1		196	149.52	1	49	109.1	1	1	1	1	1	1	4.3	1	0		2	1	95
2	114.2	1	1	10	0	5	33	1	65.5	1.68	23.21	2	1	1	70	110	60				2	1		162	112.6	1	43	86.78	1	1	1	1	1	1	4.1	0	1		2	1	93
2	107.21	1	1	10	0	5	42	1	72.5	1.61	27.97	1	0	0	93	120	70				2	1		182	148.82	1	43	98.89	1	1	1	1	1	0	6.1	0	0		2	1	96
2	107.96	1	1	20	0	5	41	1	64	1.65	23.51	2	1	1	68	125	85				2	1		192.2	95.42	1	46	86.23	1	1	1	1	1	1	4.23	1	1		2	1	93
2	112.61	1	1	20	0	5	35	1	62.5	1.69	21.88	2	1	1	66	120	90				2	1		159	75.68	1	44	81.34	1	1	1	1	1	1	3.8	1	0		2	1	95
2	95.14	1	1	10	0	5	59	1	66	1.64	24.54	2	1	1	70	120	70				2	1		187.3	136.24	1	48	115.73	1	1	1	1	1	0	6.5	1	0		1	0	118
2	104.97	1	1	10	0	5	45	1	76	1.68	26.93	1	0	0	93	120	80				2	1		182.3	146.2	1	42	90.33	1	1	1	1	1	1	5.5	1	1		2	1	98
2	119.96	1	1	20	0	5	26	1	75	1.65	27.55	1	0	0	93	110	70				2	1		179	144.62	1	43	107.08	1	1	1	1	1	1	4.5	0	0		2	1	91
2	97.17	1	1	10	0	5	56	1	84.5	1.74	27.91	1	0	0	94	120	90				2	1		184	146.2	1	48	98.37	1	1	1	1	1	1	5.5	1	0		2	1	88
2	111.82	1	1	20	0	5	36	1	84.5	1.8	26.08	1	0	0	88	130	80				2	1		182	128.66	1	56	92.7	1	1	1	1	1	0	6.6	1	0		1	0	108
2	118.29	1	1	21	0	5	28	1	79	1.71	27.02	1	0	0	87	110	60				2	1		193	92.43	1	48	106.51	1	1	1	1	1	1	5.9	1	0		2	1	98
2	101.35	1	1	10	0	5	50	1	72	1.57	29.21	1	0	0	103	130	80				2	1		191	146.2	1	56	108.2	1	1	1	1	1	0	6.6	1	1		2	1	79
2	109.49	1	1	10	0	5	39	1	74	1.87	21.16	2	1	1	79	120	80				2	1		118.2	119.2	1	44.3	66.2	1	1	1	1	1	1	4.1	1	0		2	1	82
2	115.82	1	1	10	0	5	31	1	67.5	1.66	24.5	2	1	1	79	120	80				2	1		166.2	143.1	1	43.3	67.2	1	1	1	1	1	1	4.6	1	0		2	1	98
2	116.64	1	1	10	0	5	30	1	90.5	1.75	29.55	1	0	0	100	120	85				2	1		188.3	156.7	1	38.7	115.96	1	0	1	1	0	1	5.6	1	0		2	1	87
2	112.61	1	1	10	0	5	35	1	72	1.61	27.78	1	0	0	99	120	85				2	1		180.1	143	1	48.9	94.33	1	1	1	1	1	0	6.1	1	0		2	1	93
2	107.21	1	1	10	0	5	42	1	75.5	1.77	24.1	2	1	1	74	120	90				2	1		193.2	133	1	44.8	91.3	1	1	1	1	1	1	4.1	1	0		2	1	87
2	97.85	1	1	10	0	5	55	1	77.5	1.63	29.17	1	0	0	99	150	90	1	0	0	0	0		253	188.3	0	44.7	110.23	1	1	0	0	0	0	7.2	1	0		1	0	115
2	102.78	1	1	10	0	5	48	1	60	1.66	21.77	2	1	1	70	120	80				2	1		172	139.24	1	57.9	86.14	1	1	1	1	1	0	5.2	0	0		2	1	88
2	119.96	1	1	10	0	5	26	1	56	1.69	19.61	2	1	1	69	131	70				2	1		119.2	119.72	1	62.3	78.33	1	1	1	1	1	1	5.8	0	0		1	0	113
2	106.46	1	1	10	0	5	43	1	74.5	1.68	26.4	1	0	0	85	120	80				2	1		136	124.3	1	59	82.14	1	1	1	1	1	1	5.23	0	1		2	1	95
2	111.04	1	1	10	0	5	37	1	69	1.68	24.45	2	1	1	73	120	80				2	1		163	123.29	1	49	99.34	1	1	1	1	1	1	4.4	0	0		2	1	79
2	108.73	1	1	10	0	5	40	1	66.5	1.72	22.48	2	1	1	71	110	80				2	1		180	116.52	1	40	81.3	1	1	1	1	1	1	4.1	0	0		2	1	89
2	98.54	1	1	10	0	5	54	1	59	1.62	22.48	2	1	1	74	120	80				2	1		192.2	83.36	1	54	101.33	1	1	1	1	1	1	4.1	1	1		2	1	92
2	95.14	1	1	10	0	5	59	1	82	1.66	29.76	1	0	0	97	125	85				2	1		188.3	140.44	1	44	95.81	1	1	1	1	1	0	6.6	1	0		2	1	97
2	111.04	1	1	10	0	5	37	1	76	1.76	24.54	2	1	1	76	120	80				2	1		197	138.33	1	47	83.29	1	1	1	1	1	1	4.62	1	0		2	1	93
2	119.12	1	1	20	0	5	27	1	61	1.75	19.92	2	1	1	78	130	80				2	1		156	64.45	1	48	95.11	1	1	1	1	1	1	3.9	1	0		2	1	82
2	112.61	1	1	10	0	5	35	1	54.5	1.61	21.03	2	1	1	72	130	70				2	1		193.3	136.43	1	44	91.1	1	1	1	1	1	1	4.1	1	1		2	1	85
2	113.41	1	1	20	0	5	34	1	67	1.67	24.02	2	1	1	76	120	80				2	1		167	135.2	1	46	97.88	1	1	1	1	1	1	4.8	1	0		2	1	96
2	116.64	1	1	10	0	5	30	1	64.5	1.62	24.58	2	1	1	73	125	85				2	1		183	132.33	1	44	94.2	1	1	1	1	1	1	5.2	1	1		2	1	97
2	104.24	1	1	10	0	5	46	1	84	1.85	24.54	2	1	1	79	130	70				2	1		142	76.24	1	55	71.75	1	1	1	1	1	1	5.7	1	1		2	1	95
2	112.61	1	1	10	0	5	35	1	66	1.62	25.15	1	0	0	82	130	80				2	1		192	109.3	1	51	85.23	1	1	1	1	1	1	4.8	1	1		2	1	94
2	118.29	1	1	10	0	5	28	1	52	1.73	17.37	2	1	1	73	130	70				2	1		136	77.84	1	56	64.43	1	1	1	1	1	1	2.92	0	0		2	1	96
2	116.64	1	1	10	0	5	30	1	64.5	1.7	22.32	2	1	1	69	120	80				2	1		185.3	141.55	1	48	87.3	1	1	1	1	1	1	3.52	1	0		2	1	94
2	117.46	1	1	10	0	5	29	1	64	1.71	21.89	2	1	1	75	110	70				2	1		183.3	104.99	1	46.2	111.18	1	1	1	1	1	1	4.1	1	0		2	1	93
2	96.49	1	1	10	0	5	57	1	69	1.63	25.97	1	0	0	86	120	80				2	1		111	121	1	42.3	54.8	1	1	1	1	1	1	5.6	1	1		2	1	95
2	117.46	1	1	10	0	5	29	1	64	1.55	26.64	1	0	0	87	120	70				2	1		181.1	147.65	1	46	103.47	1	1	1	1	1	1	5.62	1	1		2	1	96
2	108.73	1	1	10	0	5	40	1	82	1.83	24.49	2	1	1	75	110	85				2	1		166.2	144.2	1	46	83.34	1	1	1	1	1	1	4.2	0	1		2	1	99
2	115.01	1	1	10	0	5	32	1	69	1.67	24.74	2	1	1	72	120	80				2	1		197	66.24	1	42	71.45	1	1	1	1	1	1	4.12	1	1		2	1	96
2	117.46	1	1	10	0	5	29	1	67	1.7	23.18	2	1	1	74	125	75				2	1		135	100.66	1	44.2	80.87	1	1	1	1	1	1	4.23	0	0		2	1	95
2	119.96	1	1	10	0	5	26	1	65	1.62	24.77	2	1	1	70	110	60				2	1		100	47.98	1	47.8	63.4	1	1	1	1	1	1	2.93	0	1		2	1	84
2	115.01	1	1	10	0	5	32	1	65	1.66	23.59	2	1	1	72	110	70				2	1		184	141.84	1	58.3	79.32	1	1	1	1	1	1	4.12	1	0		2	1	80
2	118.29	1	1	10	0	5	28	1	68	1.69	23.81	2	1	1	74	110	70				2	1		150	117.3	1	44.6	81.94	1	1	1	1	1	1	4.2	1	1		2	1	71
2	107.21	1	1	10	0	5	42	1	53	1.64	19.71	2	1	1	66	120	70				2	1		168	142	1	48	91.6	1	1	1	1	1	1	3.23	0	0		2	1	74
2	112.61	1	1	10	0	5	35	1	78	1.69	27.31	1	0	0	93	110	80				2	1		193.1	147.88	1	45.33	100.28	1	1	1	1	1	1	4.66	1	0		2	1	83
2	99.24	1	1	10	0	5	53	1	72	1.61	27.78	1	0	0	93	120	80				2	1		153	135.7	1	42.3	83.56	1	1	1	1	1	1	6.1	1	1		2	1	82
2	111.04	1	1	10	0	5	37	1	72	1.71	24.62	2	1	1	72	130	80				2	1		192.3	133.5	1	46.7	87.23	1	1	1	1	1	1	5.7	1	0		2	1	76
2	97.85	1	1	10	0	5	55	1	75	1.64	27.89	1	0	0	93	125	80				2	1		184	149.9	1	48.7	85.33	1	1	1	1	1	1	4.22	1	1		2	1	80
2	114.2	1	1	10	0	5	33	1	80	1.76	25.83	1	0	0	84	120	70				2	1		104	81.79	1	51	86.64	1	1	1	1	1	1	5.22	1	1		2	1	89
2	115.01	1	1	10	0	5	32	1	54	1.59	21.36	2	1	1	73	115	70				2	1		168	66.91	1	46	88.32	1	1	1	1	1	1	4.5	1	0		2	1	81
2	107.21	1	1	10	0	5	42	1	70.5	1.68	24.98	2	1	1	72	120	80				2	1		176	140.46	1	56	109.91	1	1	1	1	1	1	4.23	1	0		2	1	94
2	107.21	1	1	10	0	5	42	1	75	1.6	29.3	1	0	0	97	121	81	0	0	1	0	0		207	155	0	37	128.4	1	0	0	0	0	1	3.12	1	1		2	1	91
2	85.63	1	1	20	3	4	74	0	67.5	1.52	29.22	1	0	0	99	140	90				1	0		228.3	169.6	0	42.7	133.3	0	1	0	0	0	0	6.2	1	1		2	1	83.94
2	83.25	1	1	10	3	4	78	0	64	1.55	26.64	1	0	0	86	100	70				2	1		220.5	148.53	1	58.1	89.31	1	1	1	0	0	1	5.33	1	1		2	1	89.35
2	108.39	1	1	20	0	5	38	1	62	1.55	25.81	1	0	0	81	130	85				2	1		119.3	120.63	1	54	81.33	1	1	1	1	1	1	5.2	1	1		2	1	71.39
2	103.19	1	1	10	0	5	45	1	60	1.5	26.67	1	0	0	82	140	90				1	0		212.88	294.9	0	29	124.9	1	0	0	0	0	1	5.23	1	1		2	1	84.49
2	89.66	1	1	10	3	4	65	0	64	1.54	26.99	1	0	0	87	130	75				2	1		231.26	149.24	1	50	91.41	1	1	1	0	0	1	4.2	1	1		2	1	70.62
2	102.46	1	1	10	0	5	46	1	77	1.6	30.08	0	0	0	96	123	83	0	0	1	0	0		236.39	129.76	1	40.2	160.24	0	1	1	0	0	1	4.6	1	1		2	1	87.52
2	108.39	1	1	10	0	5	38	1	74.5	1.7	25.78	1	0	0	83	130	80				2	1		186.3	140.43	1	53.6	87.9	1	1	1	1	1	0	6.2	0	0		1	0	108.74
2	96.86	1	1	10	0	5	54	1	62	1.5	27.56	1	0	0	88	118	72	0	0	1	0	0		193.32	50.23	1	63	120.27	1	1	1	1	1	1	4.2	1	0		2	1	68.14
2	101.75	1	1	10	0	5	47	1	59	1.5	26.22	1	0	0	81	130	70				2	1		189.3	145.1	1	54	118.2	1	1	1	1	1	1	4.5	1	0		2	1	79.31
2	101.03	1	1	10	0	5	48	1	47	1.55	19.56	2	1	1	68	110	70				2	1		118.3	75.13	1	50	63.1	1	1	1	1	1	1	4.1	0	1		2	1	70.77
2	101.03	1	1	20	0	5	48	1	60	1.65	22.04	2	1	1	70	90	70				2	1		193.37	52.45	1	49.7	89.2	1	1	1	1	1	1	4.2	1	1		2	1	94.25
2	112.26	1	1	10	0	5	33	1	66	1.7	22.84	2	1	1	71	120	70				2	1		133.2	131.89	1	58.4	88.42	1	1	1	1	1	1	3.4	1	1		2	1	75.58
2	109.92	1	1	20	0	5	36	1	54	1.61	20.83	2	1	1	71	110	70				2	1		164.9	99.99	1	49.3	95.6	1	1	1	1	1	1	4.3	1	1		2	1	87.1
2	110.7	1	1	10	0	5	35	1	59	1.65	21.67	2	1	1	71	120	80				2	1		189.22	136.22	1	66.2	89.67	1	1	1	1	1	1	5.4	1	1		1	0	101.98
2	102.46	1	1	10	0	5	46	1	66	1.61	25.46	1	0	0	82	130	70				2	1		198.27	32.1	1	45.5	85.2	1	1	1	1	1	1	4.5	0	1		2	1	90.8
2	103.19	1	1	10	0	5	45	1	81	1.72	27.38	1	0	0	87	110	70				2	1		136.63	60.3	1	42.6	81.97	1	1	1	1	1	0	7.3	1	1		1	0	113.5
2	109.15	1	1	10	0	5	37	1	62	1.65	22.77	2	1	1	72	110	70				2	1		151.92	113.03	1	88.5	70.2	1	1	1	1	1	0	7.3	1	1	6.6	0	0	128.55
2	118.75	1	1	10	0	5	25	1	66	1.67	23.67	2	1	1	72	90	70				2	1		160.1	124.96	1	49.2	66.8	1	1	1	1	1	1	3.33	0	0		2	1	87.56
2	99.62	1	1	10	0	5	50	1	75	1.64	27.89	1	0	0	88	100	70				2	1		178.22	136.95	1	87	103.33	1	1	1	1	1	0	6.2	1	1		2	1	82.03
2	101.03	1	1	10	0	5	48	1	67	1.5	29.78	1	0	0	92	100	70				2	1		189.11	131.1	1	50	94.89	1	1	1	1	1	0	6.33	1	1		2	1	97.97
2	110.7	1	1	19	0	5	35	1	45.5	1.51	19.96	2	1	1	66	100	60				2	1		154.38	117.55	1	58	92.87	1	1	1	1	1	1	5.7	1	1		2	1	71.5
2	113.85	1	1	20	0	5	31	1	51	1.53	21.79	2	1	1	67	130	80				2	1		148.5	132.37	1	48	94.03	1	1	1	1	1	1	4.2	1	1		2	1	76.64
2	109.15	1	1	10	0	5	37	1	60	1.6	23.44	2	1	1	71	110	65				2	1		180.48	79.11	1	50	70.2	1	1	1	1	1	1	4.5	1	1		2	1	57.92
2	99.62	1	1	10	0	5	50	1	59	1.61	22.76	2	1	1	74	110	70				2	1		191.55	54.27	1	52	78.23	1	1	1	1	1	1	4.33	1	1		2	1	69.02
2	85.96	1	1	10	3	4	71	0	60	1.49	27.03	1	0	0	86	120	80				2	1		185.34	119.91	1	50	101.97	1	1	1	1	1	0	6.2	1	1		2	1	84.44
2	92.22	1	1	10	0	5	61	0	60	1.53	25.63	1	0	0	86	120	80				2	1		186.51	144.06	1	49	102.79	1	1	1	1	1	0	5.4	1	1		2	1	71.17
2	102.46	1	1	10	0	5	46	1	77	1.6	30.08	0	0	0	96	125	83	0	0	1	0	0		236.39	178.3	0	40.2	160.24	0	1	0	0	0	1	5.1	1	1		2	1	87.52
2	90.29	1	1	10	0	5	64	0	63.5	1.56	26.09	1	0	0	92	130	80				2	1		187.7	140.51	1	60.1	88.3	1	1	1	1	1	1	4.6	1	1		2	1	95.54
2	88.41	1	1	10	3	4	67	0	71.5	1.68	25.33	1	0	0	81	100	80				2	1		182.33	146.2	1	52	76.33	1	1	1	1	1	1	4.7	1	1		2	1	94.43
2	88.41	1	1	10	3	4	67	0	64	1.55	26.64	1	0	0	87	130	80				2	1		190.6	141.3	1	46	78.3	1	1	1	1	1	0	7.3	1	1		2	1	76.48
2	88.41	1	1	10	3	4	67	0	51.8	1.6	20.23	2	1	1	72	120	80				2	1		149.54	147.88	1	50	73.96	1	1	1	1	1	1	4.11	1	1		2	1	73.3
2	86.57	1	1	10	3	4	70	0	60	1.6	23.44	2	1	1	74	120	80				2	1		198.08	137.44	1	51.8	88.32	1	1	1	1	1	1	3.32	1	1		2	1	77.63
2	87.18	1	1	10	3	4	69	0	56.7	1.6	22.15	2	1	1	68	110	70				2	1		186.7	117.67	1	49.4	113.77	1	1	1	1	1	1	4.34	1	1		2	1	80.17
2	89.66	1	1	10	3	4	65	0	64	1.54	26.99	1	0	0	87	110	75				2	1		231.26	149.24	1	50	91.41	1	1	1	0	0	1	4.2	1	1		2	1	70.62
2	103.62	1	1	20	0	5	42	1	65.5	1.61	25.27	1	0	0	85	120	70				2	1		178.21	110.71	1	61.3	94.77	1	1	1	1	1	1	4.33	1	1		2	1	73.88
2	105.82	1	1	10	0	5	39	1	80	1.7	27.68	1	0	0	88	130	80				2	1		137.28	66.25	1	43	81.03	1	1	1	1	1	1	3.7	1	1		2	1	69.78
2	102.89	1	1	10	0	5	43	1	54.5	1.6	21.29	1	1	1	72	120	80				2	1		128	94	1	41	68.2	1	1	1	1	1	1	3.9	1	1		2	1	67
2	107.32	1	1	20	0	5	37	1	60	1.62	22.86	2	1	1	73	120	80				2	1		185.54	147.81	1	50.6	103.38	1	1	1	1	1	1	4.12	1	1		2	1	77.63
2	104.35	1	1	20	0	5	41	1	64.3	1.58	25.76	1	0	0	82	110	70				2	1		172.95	102.31	1	43.6	108.89	1	1	1	1	1	1	4.1	1	1		2	1	93.59
2	93.25	1	1	10	0	5	57	1	62.4	1.56	25.64	1	0	0	86	130	80				2	1		150.97	135.11	1	52.5	71.3	1	1	1	1	1	1	4.3	1	0		2	1	88.54
2	115.13	1	1	10	0	5	27	1	58	1.64	21.56	2	1	1	71	110	70				2	1		175.96	82.14	1	58	91.33	1	1	1	1	1	1	4.4	1	0		2	1	66.46
2	95.91	1	1	10	0	5	53	1	63	1.53	26.91	1	0	0	86	135	82	0	0	1	0	0		175.1	148.2	1	52	89.31	1	1	1	1	1	1	5.33	1	1	6.6	0	0	129.7
2	105.82	1	1	10	0	5	39	1	52	1.6	20.31	2	1	1	69	130	70				2	1		116.06	72.76	1	49.4	72.11	1	1	1	1	1	1	5.2	1	1		2	1	74.95
2	108.08	1	1	10	0	5	36	1	64	1.6	25	1	1	1	80	120	80				2	1		173.88	144.43	1	57.2	107.79	1	1	1	1	1	1	5.2	1	1		2	1	80.57
2	116.76	1	1	10	0	5	25	1	55.5	1.5	24.67	2	1	1	72	120	60				2	1		157.56	76.08	1	57.1	105.24	1	1	1	1	1	0	6.6	1	1		1	0	111.09
2	114.32	1	1	10	0	5	28	1	60	1.64	22.31	2	1	1	70	110	70				2	1		176.74	80.16	1	45.2	95.51	1	1	1	1	1	1	3.77	1	1		2	1	86.71
2	91.31	1	1	20	0	5	60	0	84	1.6	32.81	0	0	0	89	132	85	0	0	1	0	0		143.11	116	1	62.5	98.22	1	1	1	1	1	0	7.1	1	1	7.11	0	0	147.4
2	100.04	1	1	20	0	5	47	1	50	1.55	20.81	2	1	1	68	130	60				2	1		199.2	110.24	1	60.9	96.2	1	1	1	1	1	1	4.2	1	1		2	1	73.27
2	108.08	1	1	10	0	5	36	1	59	1.58	23.63	2	1	1	70	110	60				2	1		167.18	111.58	1	40	88.3	1	1	1	1	1	1	4.12	0	0		2	1	79.72
2	108.84	1	1	10	0	5	35	1	59	1.63	22.21	2	1	1	69	110	80				2	1		171.2	131.73	1	74	71.33	1	1	1	1	1	1	4.1	1	1		2	1	83.41
2	105.82	1	1	10	0	5	39	1	64	1.58	25.64	1	0	0	81	120	80				2	1		169.12	141.88	1	54	90.2	1	1	1	1	1	0	6.2	1	0		1	0	100.45
2	100.04	1	1	10	0	5	47	1	53	1.56	21.78	2	1	1	66	120	80				2	1		124.78	88.24	1	41	66.13	1	1	1	1	1	1	4.23	1	0		2	1	67.02
2	115.94	1	1	10	0	5	26	1	55	1.58	22.03	2	1	1	70	130	80				2	1		166.61	126.25	1	59	102.36	1	1	1	1	1	1	4.2	1	1		2	1	70.74
2	104.35	1	1	20	0	5	41	1	66	1.58	26.44	1	0	0	87	130	55				2	1		180.85	112.5	1	70	116.44	1	1	1	1	1	1	5.2	1	1		2	1	69.31
2	111.16	1	1	10	0	5	32	1	70	1.62	26.67	1	0	0	86	130	70				2	1		182.19	177.29	1	37	109.73	1	0	0	1	0	1	5.1	1	1		2	1	84.24
2	110.38	1	1	10	0	5	33	1	59	1.5	26.22	1	0	0	83	130	80				2	1		116.99	77.49	1	41	60.49	1	1	1	1	1	1	3.12	1	1		2	1	75.05
2	113.52	1	1	20	0	5	29	1	54	1.53	23.07	2	1	1	72	120	70				2	1		151.71	72.51	1	40	97.21	1	1	1	1	1	1	3.51	1	1		2	1	54.98
2	115.13	1	1	10	0	5	27	1	74	1.7	25.61	1	0	0	84	120	70				2	1		168	85	1	51	90	1	1	1	1	1	1	5.5	0	0		2	1	74
2	116.76	1	1	10	0	5	25	1	58.5	1.63	22.02	2	1	1	69	120	70				2	1		112	103	1	48	43.4	1	1	1	1	1	1	4.1	1	1		2	1	72
2	101.46	1	1	10	0	5	45	1	67	1.59	26.5	1	0	0	86	120	80				2	1		191.99	77.54	1	49	89.32	1	1	1	1	1	1	4.66	1	1		2	1	66.82
2	116.76	1	1	10	0	5	25	1	71	1.68	25.16	1	0	0	82	115	60				2	1		185.39	129.33	1	47.5	98.02	1	1	1	1	1	1	4.7	1	1		2	1	77.14
2	101.46	1	1	10	0	5	45	1	69	1.55	28.72	1	0	0	88	125	80				2	1		170.73	141.09	1	48	96.49	1	1	1	1	1	0	7.6	0	1		2	1	86.72
2	116.76	1	1	20	0	5	25	1	44.5	1.52	19.26	2	1	1	68	130	70				2	1		193	121.47	1	44.6	84.22	1	1	1	1	1	0	6.6	1	1		1	0	124.7
2	111.16	1	1	10	0	5	32	1	53	1.53	22.64	2	1	1	70	110	70				2	1		191.3	141.47	1	42.7	88.32	1	1	1	1	1	1	5.6	1	1		2	1	94.2
2	114.32	1	1	10	0	5	28	1	50	1.62	19.05	2	1	1	68	120	80				2	1		179.3	57.99	1	61.7	77.3	1	1	1	1	1	1	3.1	1	1		2	1	93.83
2	115.13	1	1	10	0	5	27	1	49	1.54	20.66	2	1	1	68	110	70				2	1		147.95	137.39	1	59	75.47	1	1	1	1	1	1	3.1	1	1		2	1	88
2	111.94	1	1	10	0	5	31	1	70	1.58	28.04	1	0	0	96	130	70				2	1		199.33	136.33	1	47.8	90.37	1	1	1	1	1	0	6.3	1	1		2	1	88.55
2	104.35	1	1	10	0	5	41	1	61	1.56	25.07	1	0	0	81	120	60				2	1		130.82	102.98	1	42	68.22	1	1	1	1	1	1	5.2	0	1		2	1	85.97
2	112.73	1	1	20	0	5	30	1	81	1.7	28.03	1	0	0	90	110	70				2	1		172.23	121.3	1	57	91	1	1	1	1	1	1	4.2	0	1		2	1	56.9
2	103.62	1	1	20	0	5	42	1	65.5	1.61	25.27	1	0	0	85	120	70				2	1		178.21	110.71	1	61.3	94.77	1	1	1	1	1	1	4.33	1	1		2	1	73.88
2	108.08	1	1	10	0	5	36	1	77	1.75	25.14	1	0	0	82	120	70				2	1		206.64	104.88	1	47.6	88.32	1	1	1	0	1	1	4.6	1	1		2	1	83.62
2	115.13	1	1	10	0	5	27	1	57	1.62	21.72	2	1	1	68	110	70				2	1		174.35	75.3	1	44.9	84.89	1	1	1	1	1	1	3.8	1	1		2	1	74.06
2	105.82	1	1	10	0	5	39	1	80	1.7	27.68	1	0	0	88	100	80				2	1		137.28	66.25	1	43	81.03	1	1	1	1	1	1	3.7	1	1		2	1	69.78
2	102.89	1	1	10	0	5	43	1	54.5	1.6	21.29	2	1	1	70	100	80				2	1		128	94	1	41	68.2	1	1	1	1	1	1	3.9	1	1		2	1	67
2	115.13	1	1	10	0	5	27	1	65	1.7	22.49	2	1	1	73	120	80				2	1		114	79.3	1	46	52.14	1	1	1	1	1	1	4.1	0	0		2	1	95
2	115.13	1	1	10	0	5	27	1	57	1.62	21.72	2	1	1	74	105	70				2	1		174.35	75.3	1	44.9	85.2	1	1	1	1	1	1	3.8	1	1		2	1	74.06
2	112.73	1	1	10	0	5	30	1	68	1.62	25.91	1	0	0	91	110	70				2	1		116	145.88	1	56	91.18	1	1	1	1	1	1	3.3	1	1		2	1	75.99
2	105.82	1	1	10	0	5	39	1	80	1.7	27.68	1	0	0	88	130	80				2	1		137.28	66.25	1	43	81.03	1	1	1	1	1	1	3.7	1	1		2	1	69.78
2	102.89	1	1	10	0	5	43	1	54.5	1.53	23.28	2	1	1	70	120	80				2	1		128	94	1	41	68.2	1	1	1	1	1	1	3.9	1	1		2	1	67
2	112.73	1	1	10	0	5	30	1	90	1.75	29.39	1	0	0	96	120	90				2	1		239	157.55	0	52	98.3	1	1	0	0	0	1	4.1	1	0		2	1	80
2	107.32	1	1	10	0	5	37	1	53	1.56	21.78	2	1	0	80	120	70				2	1		181.98	84.9	1	51.9	93.1	1	1	1	1	1	1	6.6	1	1		1	0	107.73
2	98.64	1	1	10	0	5	49	1	80.5	1.7	27.85	1	0	0	93	120	80				2	1		184	130	1	51	97.1	1	1	1	1	1	1	5.2	0	1		2	1	85
2	104.35	1	1	10	0	5	41	1	69	1.65	25.34	1	0	0	81	100	80				2	1		118.2	143	1	54	55.5	1	1	1	1	1	1	4.22	1	1		2	1	73
2	108.08	1	1	10	0	5	36	1	70	1.62	26.67	1	0	0	87	125	80				2	1		192	79	1	50	86.2	1	1	1	1	1	1	5.4	1	1		2	1	82
2	113.52	1	1	10	0	5	29	1	78.5	1.66	28.49	1	0	0	92	125	80				2	1		187	103	1	54	92.4	1	1	1	1	1	0	6.5	0	1		2	1	85
2	112.73	1	1	24	0	5	30	1	68	1.68	24.09	2	1	1	70	110	70				2	1		152	123.69	1	45	92.26	1	1	1	1	1	1	4.4	1	1		2	1	96
2	111.94	1	1	10	0	5	31	1	85	1.72	28.73	1	0	0	94	120	90				2	1		189	144.7	1	44.2	115.86	1	1	1	1	1	0	6.6	1	0		2	1	96
2	111.94	1	1	10	0	5	31	1	83	1.77	26.49	1	0	0	90	130	70				2	1		171.42	107.8	1	54	95.96	1	1	1	1	1	1	4.2	1	0		2	1	72.91
2	115.94	1	1	10	0	5	26	1	74	1.75	24.16	2	1	1	79	110	70				2	1		196.8	115.77	1	41	66.32	1	1	1	1	1	1	4.8	0	0		2	1	63.8
2	112.73	1	1	10	0	5	30	1	74	1.73	24.73	2	1	1	76	120	80				2	1		172	140.55	1	57	90.28	1	1	1	1	1	1	4.7	1	0		2	1	69
2	110.38	1	1	10	0	5	33	1	70.5	1.74	23.29	2	1	1	76	130	80				2	1		199.3	133	1	47	95.22	1	1	1	1	1	1	5.7	1	1		1	0	103
2	100.75	1	1	10	0	5	46	1	58	1.62	22.1	2	1	1	69	110	70				2	1		178	99.48	1	54	71.3	1	1	1	1	1	1	5.9	1	0		2	1	94.2
2	114.32	1	1	10	0	5	28	1	78.5	1.74	25.93	1	0	0	84	125	80				2	1		168	95.33	1	58	90.93	1	1	1	1	1	1	5.6	1	0		2	1	99
2	110.38	1	1	10	0	5	33	1	61	1.74	20.15	2	1	1	78	120	70				2	1		142	74.5	1	58	89.1	1	1	1	1	1	1	3.32	1	1		2	1	92
2	105.82	1	1	10	0	5	39	1	77	1.67	27.61	1	0	0	88	125	70				2	1		122	144.28	1	47	89.3	1	1	1	1	1	1	5.77	1	1		2	1	87
2	112.73	1	1	10	0	5	30	1	75	1.78	23.67	2	1	1	75	110	60				2	1		132	94.69	1	55	58.06	1	1	1	1	1	1	4.2	0	0		2	1	54
2	107.32	1	1	10	0	5	37	1	86	1.71	29.41	1	0	0	99	110	80				2	1		172	146.01	1	52.3	86.32	1	1	1	1	1	1	5.2	1	0		2	1	77
2	115.94	1	1	10	0	5	26	1	63	1.69	22.06	2	1	1	78	120	70				2	1		193.1	145.3	1	60.8	83.3	1	1	1	1	1	0	7.3	1	1		2	1	96.2
2	110.38	1	1	10	0	5	33	1	75	1.79	23.41	2	1	1	82	110	70				2	1		113.2	119.88	1	57	62.02	1	1	1	1	1	1	4.1	1	1		2	1	82
2	85.72	1	1	10	0	4	69	0	63.5	1.65	23.32	2	1	1	70	110	80				2	1		150.19	136.62	1	42	92.1	1	1	1	1	1	1	4.1	1	1		2	1	81.7
2	86.93	1	1	10	0	4	67	0	70	1.6	27.34	1	0	0	89	120	80				2	1		195.36	83.95	1	52	126.57	1	1	1	1	1	1	5.3	1	1		2	1	79.83
2	82.76	1	1	10	3	4	74	0	62.3	1.65	22.88	2	1	1	69	110	80				2	1		137.2	119.31	1	47.4	86.44	1	1	1	1	1	0	6.6	1	1		1	0	103.47
2	85.12	1	1	10	3	4	70	0	64.5	1.54	27.2	1	0	0	88	110	80				2	1		181.32	115.31	1	55.3	92.96	1	1	1	1	1	1	5.6	1	1		2	1	86.87
2	83.34	1	1	10	3	4	73	0	65	1.6	25.39	1	0	0	81	120	80				2	1		191.83	149.04	1	98.2	89.32	1	1	1	1	1	1	5.2	1	1		2	1	83.31
2	84.52	1	1	10	3	4	71	0	47	1.51	20.61	2	1	1	70	120	80				2	1		174.98	125.96	1	58.5	81.33	1	1	1	1	1	1	4.6	1	1		2	1	94.4
2	82.76	1	1	10	3	4	74	0	49	1.54	20.66	2	1	1	70	130	80				2	1		140.34	134.92	1	65.6	78.3	1	1	1	1	1	1	4.1	1	1		2	1	84.27
2	103.62	1	1	20	0	5	42	1	70	1.62	26.67	1	0	0	86	130	70				2	1		131.47	146.06	1	55	91.96	1	1	1	1	1	1	5.5	1	0		2	1	66.49
2	115.94	1	1	10	0	5	26	1	55	1.57	22.31	2	1	1	70	120	78				2	1		189.41	144.48	1	68.8	81.22	1	1	1	1	1	1	3.77	1	1	5.9	2	1	85.19
2	97.95	1	1	10	0	5	50	1	54	1.54	22.77	2	1	0	83	130	70				2	1		192.63	128.88	1	60.4	106.45	1	1	1	1	1	1	4.1	1	1		2	1	93.07
2	106.29	1	1	10	0	5	36	1	68	1.7	23.53	2	1	1	72	120	80				2	1		198.67	114.22	1	50.7	78.3	1	1	1	1	1	1	4.44	1	1		2	1	66.31
2	100.48	1	1	10	0	5	44	1	62	1.58	24.84	2	1	1	72	126	82	0	0	1	0	0		171.92	120.57	1	52.6	95.21	1	1	1	1	1	1	5.6	1	1	7.8	1	0	102.36
2	103.34	1	1	10	0	5	40	1	88	1.63	33.12	0	0	0	95	123	70				2	1		249.17	330.69	0	34	166.2	0	0	0	0	0	0	6.2	1	1		1	0	103.94
2	89.17	1	1	10	3	4	61	0	70	1.65	25.71	1	0	0	81	122	83	0	0	1	0	0		189.33	109.29	1	70.9	85.99	1	1	1	1	1	1	4.2	1	1		2	1	85.01
2	102.62	1	1	10	0	5	41	1	62	1.57	25.15	1	0	0	82	110	70				2	1		197.79	146.85	1	63.5	92.3	1	1	1	1	1	1	3.9	1	1		2	1	83.53
2	114.02	1	1	10	0	5	26	1	53.5	1.64	19.89	2	1	1	72	120	70				2	1		184.31	106.28	1	74	89.05	1	1	1	1	1	1	3.3	1	1		2	1	77.87
2	94.33	1	1	10	0	5	53	1	82	1.6	32.03	0	0	0	101	145	90		1	0	0	0		239.25	136.2	1	40	161.21	0	1	1	0	0	1	3.5	1	1		2	1	99.68
2	101.9	1	1	10	0	5	42	1	56.5	1.6	22.07	2	1	1	70	120	70				2	1		191.3	69.43	1	49.3	88.3	1	1	1	1	1	1	4.1	1	1		2	1	76.06
2	101.19	1	1	10	0	5	43	1	79	1.55	32.88	0	0	0	99	100	80				2	1		189.33	74.96	1	69.2	93.33	1	1	1	1	1	1	5.5	1	1		2	1	87.62
2	108.55	1	1	10	0	5	33	1	66	1.62	25.15	1	0	0	81	110	80				2	1		122.33	135.47	1	49.7	95.64	1	1	1	1	1	1	5.1	1	1		2	1	99.04
2	109.32	1	1	10	0	5	32	1	72.5	1.64	26.96	1	0	0	88	100	80				2	1		183.46	113.26	1	55	99.3	1	1	1	1	1	1	5.66	1	1		2	1	90.42
2	93.01	1	1	10	0	5	55	1	60.5	1.54	25.51	1	0	0	82	123	84	0	0	1	0	0		193.83	117.62	1	53.2	96.91	1	1	1	1	1	1	5.22	1	1		2	1	67.35
2	98.39	1	1	10	0	5	47	1	58	1.64	21.56	2	1	1	71	90	60				2	1		179.2	118.87	1	55.5	80.2	1	1	1	1	1	1	5.2	0	1		2	1	73.88
2	112.43	1	1	10	0	5	28	1	66	1.66	23.95	2	1	1	70	110	80				2	1		129.2	127.2	1	53.2	78.32	1	1	1	1	1	1	4.11	0	1		2	1	85.22
2	110.09	1	1	10	0	5	31	1	64	1.62	24.39	2	1	1	73	100	70				2	1		171.39	93.71	1	73	88.32	1	1	1	1	1	1	3.1	1	1		2	1	64.15
2	100.48	1	1	20	0	5	44	1	63	1.56	25.89	1	0	0	82	110	70				2	1		188.33	144.43	1	52.3	107.14	1	1	1	1	1	1	5.1	1	1		2	1	78.3
2	101.19	1	1	10	0	5	43	1	68	1.61	26.23	1	0	0	86	120	80				2	1		151.1	94.08	1	88.7	83.2	1	1	1	1	1	1	5.33	0	1		2	1	79.96
2	94.99	1	1	10	0	5	52	1	63.5	1.56	26.09	1	0	0	81	100	85				2	1		194.64	212.62	1	72	80.12	1	1	0	1	0	1	5.23	1	1		2	1	84.63
2	99.08	1	1	10	0	5	46	1	68	1.56	27.94	1	0	0	87	110	80				2	1		252.12	115.77	1	62	132.11	0	1	1	0	1	1	5.8	1	1		2	1	75.26
2	97.01	1	1	10	0	5	49	1	73	1.53	31.18	0	0	0	94	130	70				2	1		154.27	126.24	1	34	95.02	1	0	1	1	0	0	6.8	1	1		2	1	85.02
2	93.01	1	1	10	0	5	55	1	54.5	1.52	23.59	2	1	1	70	110	80				2	1		170.07	94.86	1	49	93.22	1	1	1	1	1	1	4.1	1	1		2	1	67.97
2	107.04	1	1	10	0	5	35	1	55	1.56	22.6	2	1	1	72	120	80				2	1		181.47	63.62	1	58	110.75	1	1	1	1	1	1	5.1	1	1		2	1	67.94
2	96.33	1	1	10	0	5	50	1	57	1.62	21.72	2	1	1	69	120	70				2	1		178.75	133.91	1	47.7	60.27	1	1	1	1	1	1	4.23	1	1		1	0	108.58
2	100.48	1	1	10	0	5	44	1	62	1.62	23.62	2	1	1	70	120	80				2	1		171.92	120.57	1	52.6	95.21	1	1	1	1	1	1	5.6	1	1	7.8	1	0	102.36
2	115.64	1	1	10	0	5	24	1	60	1.71	20.52	2	1	1	76	110	80				2	1		149.4	66.09	1	54	82.18	1	1	1	1	1	1	4.3	1	0		2	1	58.22
2	90.43	1	1	10	0	5	59	1	60.5	1.53	25.84	1	0	0	83	120	80				2	1		178.3	134.44	1	55.3	96.11	1	1	1	1	1	1	4.32	1	1		2	1	88.3
2	86.09	1	1	20	3	4	66	0	76	1.58	30.44	0	0	0	98	126	82	0	0	1	0	0		169.66	388.26	1	38	129.01	1	0	0	1	0	0	7.1	1	1	8.1	0	0	157.42
2	87.31	1	1	10	3	4	64	0	71.8	1.78	22.66	2	1	1	73	120	70				2	1		178.3	127.33	1	47.7	94.3	1	1	1	1	1	1	5.1	1	0		2	1	88.5
2	84.3	1	1	10	3	4	69	0	85	1.62	32.39	0	0	0	99	120	80				2	1		185.07	131.15	1	54.5	88.32	1	1	1	1	1	0	6.6	1	1		2	1	74.39
2	85.49	1	1	20	3	4	67	0	65	1.52	28.13	1	0	0	84	120	80				2	1		191.26	145.2	1	71.7	89.32	1	1	1	1	1	0	6.1	1	1		2	1	81.72
2	87.93	1	1	10	3	4	63	0	60.5	1.53	25.84	1	0	0	86	110	70				2	1		178.3	134.44	1	55.3	96.11	1	1	1	1	1	1	4.32	1	1		2	1	88.3
2	106.29	1	1	10	0	5	36	1	64	1.66	23.23	2	1	1	72	110	80				2	1		196.7	147.18	1	41.2	97.9	1	1	1	1	1	1	4.2	1	1		2	1	62.13
2	103.82	1	1	10	0	5	37	1	88	1.65	32.32	0	0	0	98	130	80				2	1		218.73	161.3	0	70.3	96.2	1	1	0	0	0	1	4.22	1	1	6.6	2	1	67.4
2	100.95	1	1	10	0	5	41	1	82	1.6	32.03	0	0	0	96	100	70				2	1		133.51	82.74	1	46.4	70.56	1	1	1	1	1	1	5.2	1	1		2	1	91.37
2	98.15	1	1	10	0	5	45	1	62	1.55	25.81	1	0	0	83	130	60				2	1		164.52	63.25	1	44	107.87	1	1	1	1	1	1	4.4	1	1		2	1	85.55
2	99.54	1	1	10	0	5	43	1	62	1.6	24.22	2	1	1	73	120	70				2	1		158.91	133.17	1	49	95.28	1	1	1	1	1	1	4.3	1	1		2	1	90.96
2	88.33	1	1	10	3	4	60	0	82	1.6	32.03	0	0	0	101	120	80				2	1		170.23	145.29	1	53.9	77.78	1	1	1	1	1	0	6.88	1	1		1	0	109.73
2	100.24	1	1	10	0	5	42	1	60	1.65	22.04	2	1	1	72	90	70				2	1		169.62	119.28	1	48	97.76	1	1	1	1	1	1	3.2	1	1		2	1	87.8
2	110.6	1	1	10	0	5	28	1	55	1.6	21.48	2	1	1	71	110	60				2	1		193.1	137.22	1	47.8	97.3	1	1	1	1	1	1	5.2	1	1		2	1	81.96
2	88.96	1	1	10	3	4	59	1	70.5	1.5	31.33	0	0	0	101	110	70				2	1		208.46	147.23	1	34.3	144.71	0	0	1	0	0	1	3.7	1	1		2	1	87.9
2	101.66	1	1	10	0	5	40	1	60	1.66	21.77	2	1	1	72	130	70				2	1		189.2	92.96	1	53	88.2	1	1	1	1	1	1	4.3	1	1		2	1	81.06
2	106.03	1	1	10	0	5	34	1	55	1.62	20.96	2	1	1	70	120	70				2	1		162.93	69.31	1	58.3	110.77	1	1	1	1	1	1	3.6	1	1		2	1	81.08
2	106.78	1	1	10	0	5	33	1	54	1.6	21.09	2	1	1	70	120	70				2	1		178.07	120.51	1	58.5	85.2	1	1	1	1	1	1	5.6	0	1		2	1	97.3
2	100.95	1	1	10	0	5	41	1	63.4	1.62	24.16	2	1	1	71	120	60				2	1		177.18	88.6	1	48.5	80.22	1	1	1	1	1	1	4.33	1	1		2	1	76.22
2	107.54	1	1	10	0	5	32	1	64	1.7	22.15	2	1	1	70	100	90				2	1		154.1	116.96	1	57.6	83.1	1	1	1	1	1	1	4.22	0	0		2	1	88.08
2	99.54	1	1	10	0	5	43	1	54	1.62	20.58	2	1	1	69	130	70				2	1		201.62	165.74	0	73.8	94.67	1	1	0	0	0	1	4.4	1	1		2	1	81.62
2	105.29	1	1	10	0	5	35	1	63	1.63	23.71	2	1	1	72	130	80				2	1		192.22	116.55	1	54.8	99.69	1	1	1	1	1	0	4.3	1	1		2	1	63.13
2	88.96	1	1	10	3	4	59	1	71	1.58	28.44	1	0	0	91	130	70				2	1		131.48	146.99	1	49	99.3	1	1	1	1	1	1	5.66	0	1		2	1	86.77
2	103.82	1	1	10	0	5	37	1	60	1.65	22.04	2	1	1	66	120	70				2	1		193.43	116.39	1	43	88.23	1	1	1	1	1	1	4	1	1		2	1	90.51
2	98.15	1	1	10	0	5	45	1	64	1.5	28.44	1	0	0	88	120	80				2	1		161.23	143.12	1	54	88.7	1	1	1	1	1	1	3.3	0	1		2	1	77.49
2	88.33	1	1	20	3	4	60	0	75	1.6	29.3	1	0	0	95	160	80				2	1		181.86	110.5	1	56.4	103.36	1	1	1	1	1	0	6.6	1	1		2	1	84.67
2	89.58	1	1	20	3	4	58	1	77.5	1.62	29.53	1	0	0	93	122	82				1	0		216.46	175.9	0	40	133.28	0	1	0	0	0	0	7.2	0	1		2	1	72.71
2	100.24	1	1	10	0	5	42	1	63	1.6	24.61	2	1	1	69	110	70				2	1		186.32	148.16	1	49.2	93	1	1	1	1	1	1	4.44	1	1		2	1	98.87
2	103.82	1	1	10	0	5	37	1	65	1.56	26.71	1	0	0	87	110	70				2	1		167	130.95	1	53.9	78.91	1	1	1	1	1	1	5.33	1	1		2	1	75.64
2	95.43	1	1	10	0	5	49	1	65	1.55	27.06	1	0	0	87	120	80				2	1		174.81	64.35	1	52	99.94	1	1	1	1	1	1	5.8	1	0		2	1	73.57
2	94.76	1	1	10	0	5	50	1	61	1.55	25.39	1	0	0	86	130	60				2	1		195.91	70.62	1	45	99.2	1	1	1	1	1	0	6.6	1	1		2	1	85.9
2	96.1	1	1	24	0	5	48	1	72	1.54	30.36	0	0	0	90	120	80				2	1		148.03	130.69	1	41.2	82.19	1	1	1	1	1	0	6.33	1	1		2	1	75.45
2	98.15	1	1	10	0	5	45	1	62	1.55	25.81	1	0	0	89	120	60				2	1		164.52	63.25	1	44	107.87	1	1	1	1	1	1	4.4	1	1		2	1	85.55
2	106.78	1	1	10	0	5	33	1	78	1.58	31.24	0	0	0	101	120	81				2	1		196	140.11	1	60	103.98	1	1	1	1	1	0	6.8	0	0		2	1	95
2	81.77	1	1	10	3	4	71	0	60	1.65	22.04	2	1	1	69	110	80				2	1		126.2	127.55	1	49	89.2	1	1	1	1	1	1	4.1	1	1		2	1	88.6
2	86.49	1	1	10	3	4	63	0	80	1.6	31.25	0	0	0	95	115	70				2	1		225.14	223.73	0	61	119.39	1	1	0	0	0	0	7.1	1	1		2	1	98.85
2	77.3	1	1	10	3	4	79	0	68.5	1.5	30.44	0	0	0	99	125	80				2	1		287.61	93.69	1	61.2	98.2	1	1	1	0	0	0	6.6	1	1		2	1	93.47
2	78.94	1	1	10	3	4	76	0	67	1.6	26.17	1	0	0	88	110	70				2	1		193.2	122.74	1	42.5	86.11	1	1	1	1	1	1	5.77	0	0		2	1	95.15
2	81.77	1	1	20	3	4	71	0	60	1.61	23.15	2	1	1	70	105	80				2	1		126.2	127.55	1	49	89.2	1	1	1	1	1	1	4.1	1	1		2	1	88.6
2	91.29	1	1	10	0	5	53	1	89	1.65	32.69	0	0	0	106	145	90				1	0		248.16	137.58	1	52.5	138.15	0	1	1	0	0	1	4.6	1	0		2	1	98.77
2	101.44	1	1	10	0	5	38	1	62	1.54	26.14	1	0	0	84	120	70				2	1		175.12	98.78	1	50.1	95.26	1	1	1	1	1	1	4.5	1	1		2	1	98.46
2	102.15	1	1	10	0	5	37	1	71.2	1.58	28.52	1	0	0	89	120	70				2	1		181.75	124.79	1	53	93.79	1	1	1	1	1	1	5	1	1		1	0	100.81
2	96.57	1	1	20	0	5	45	1	62	1.61	23.92	2	1	1	73	120	70				2	1		192.3	95.32	1	47	86.56	1	1	1	1	1	1	4.32	1	1		2	1	73.49
2	104.33	1	1	10	0	5	34	1	55	1.57	22.31	2	1	1	69	120	80				2	1		149.08	130.78	1	51.8	61.2	1	1	1	1	1	1	4.1	1	1		1	0	106.16
2	88.14	1	1	10	3	4	58	1	82.5	1.56	33.9	0	0	0	99	120	60				2	1		194.11	132.13	1	56	91.3	1	1	1	1	1	1	5.2	1	1		2	1	74.49
2	90.02	1	1	20	0	5	55	1	85	1.6	33.2	0	0	0	99	140	90				1	0		194.06	372.21	1	33	86.62	1	0	0	1	0	0	7.1	1	1		1	0	116.24
2	97.25	1	1	10	0	5	44	1	61	1.51	26.75	1	0	0	86	120	80				2	1		183.7	140.03	1	63	88.86	1	1	1	1	1	1	4.6	1	1		2	1	72.73
2	87.53	1	1	10	3	4	59	1	75	1.55	31.22	0	0	0	106	140	90				1	0		131.86	41.61	1	55.6	97.94	1	1	1	1	1	0	6.6	1	1		2	1	95.23
2	104.33	1	1	10	0	5	34	1	48	1.5	21.33	2	1	1	72	120	52				2	1		157.84	69.31	1	55.7	88.28	1	1	1	1	1	1	4.2	1	1		2	1	67.83
2	94.56	1	1	10	0	5	48	1	80	1.6	31.25	0	0	0	101	90	70				2	1		181.3	145.27	1	35	129.3	1	0	1	1	0	1	4.4	1	1		1	0	104.1
2	95.22	1	1	10	0	5	47	1	76	1.72	25.69	1	0	0	82	120	70				2	1		181.32	97.04	1	42.6	109.2	1	1	1	0	1	1	4.32	1	1		1	0	104.43
2	110.36	1	1	10	0	5	26	1	56	1.54	23.61	2	1	1	71	110	70				2	1		185.02	76.66	1	59.1	78.6	1	1	1	1	1	1	4.33	1	1		1	0	101.05
2	91.29	1	1	10	0	5	53	1	58.5	1.52	25.32	1	0	0	82	120	80				2	1		170.86	144.1	1	46.8	92	1	1	1	1	1	1	5.2	1	1		2	1	68.14
2	97.94	1	1	10	0	5	43	1	66	1.51	28.95	1	0	0	91	120	70				2	1		180.92	60.66	1	53.7	115.09	1	1	1	1	1	1	5.7	1	1		2	1	97.49
2	106.55	1	1	10	0	5	31	1	60	1.51	26.31	1	0	0	87	120	80				2	1		158.2	121.59	1	55.5	78.07	1	1	1	1	1	1	5	1	1		2	1	90.78
2	110.36	1	1	20	0	5	26	1	75	1.63	28.23	1	0	0	89	110	60				2	1		282.31	117.39	1	65.5	133.3	0	1	1	0	0	1	5.6	1	1		2	1	85.34
2	100.73	1	1	10	0	5	39	1	72	1.52	31.16	0	0	0	97	120	70				2	1		345.86	356.3	0	30	166.3	0	0	0	0	0	1	3.9	1	1		2	1	99.92
2	103.6	1	1	10	0	5	35	1	81.5	1.64	30.3	0	0	0	93	100	80				2	1		174.45	51.26	1	42.1	122.1	1	1	1	1	1	0	6.2	1	1		2	1	84.64
2	88.76	1	1	10	3	4	57	1	66	1.58	26.44	1	0	0	88	110	80				2	1		179.95	141.3	1	57.5	92.7	1	1	1	1	1	1	5.2	1	1		2	1	87.05
2	88.76	1	1	10	3	4	57	1	67	1.52	29	1	0	0	93	130	70				2	1		146.42	82.23	1	53.8	86.17	1	1	1	1	1	0	6.66	1	1		2	1	83.73
2	102.87	1	1	10	0	5	36	1	65	1.67	23.31	2	1	1	73	120	80				2	1		160.15	139.27	1	58	90.24	1	1	1	1	1	0	6.6	1	1		1	0	109.13
2	95.22	1	1	10	0	5	47	1	64.2	1.68	22.75	2	1	1	70	100	80				2	1		195.02	102.95	1	40.2	94.22	1	1	1	1	1	1	3.6	1	1		2	1	95.26
2	89.39	1	1	10	3	4	56	1	66	1.58	26.44	1	0	0	89	110	90				2	1		192.3	141.03	1	91.5	92.23	1	1	1	1	1	1	5.89	1	1		2	1	85.75
2	100.73	1	1	10	0	5	39	1	50	1.66	18.14	2	1	1	67	130	70				2	1		145.62	135.11	1	46	72.6	1	1	1	1	1	1	4.32	1	1		2	1	68.74
2	101.44	1	1	10	0	5	38	1	68	1.66	24.68	2	1	1	71	120	70				2	1		130.88	114.58	1	59	69.2	1	1	1	1	1	1	4.2	1	1		2	1	76.17
2	105.06	1	1	10	0	5	33	1	53	1.52	22.94	2	1	1	70	120	75				2	1		103.85	120.38	1	40	55.7	1	1	1	1	1	1	3.72	1	1		2	1	70.33
2	95.89	1	1	10	0	5	46	1	58	1.6	22.66	2	1	1	72	120	80				2	1		165.67	134.51	1	49	103.22	1	1	1	1	1	1	4.7	1	1		2	1	55.23
2	102.87	1	1	10	0	5	36	1	53	1.54	22.35	2	1	1	69	110	70				2	1		192.51	125.22	1	45	91.23	1	1	1	1	1	1	5.7	1	1		2	1	70.59
2	108.06	1	1	10	0	5	29	1	48.5	1.56	19.93	2	1	1	68	125	70				2	1		123.1	78.93	1	49.7	69.3	1	1	1	1	1	1	3.23	1	1		2	1	93.59
2	86.91	1	1	10	3	4	60	0	69	1.6	26.95	1	0	0	86	110	70				2	1		141.22	70.44	1	49	78.13	1	1	1	1	1	1	5.2	1	1		2	1	66.36
2	89.39	1	1	20	3	4	56	1	53	1.6	20.7	2	1	1	70	120	70				2	1		190.2	125.89	1	53	102.37	1	1	1	1	1	1	4.1	1	1		2	1	75.95
2	93.24	1	1	20	0	5	50	1	66	1.59	26.11	1	0	0	86	100	70				2	1		157.3	113.1	1	61.8	82.3	1	1	1	1	1	0	7.03	1	1		1	0	121.54
2	95.22	1	1	10	0	5	47	1	58	1.56	23.83	2	1	1	68	130	80				2	1		189.17	146.2	1	50.8	86.2	1	1	1	1	1	1	4.2	1	1		2	1	89.2
2	103.6	1	1	23	0	5	35	1	60	1.52	25.97	1	0	0	83	130	80				2	1		167.42	131.3	1	47.7	103.39	1	1	1	1	1	1	5.5	1	1		2	1	80.29
2	96.57	1	1	10	0	5	45	1	60	1.59	23.73	2	1	1	70	110	70				2	1		152.3	144.3	1	60.1	93.4	1	1	1	1	1	1	4.23	0	1		2	1	79.8
2	96.57	1	1	20	3	5	45	1	62	1.61	23.92	2	1	1	78	110	70				2	1		192.3	95.32	1	47	86.56	1	1	1	1	1	1	4.32	1	1		2	1	73.49
2	104.33	1	1	10	0	5	34	1	55	1.57	22.31	2	1	1	76	120	80				2	1		149.08	130.78	1	51.8	61.2	1	1	1	1	1	1	4.1	1	1		1	0	106.16
2	99.32	1	1	10	0	5	41	1	72	1.65	26.45	1	0	0	91	130	85				2	1		185.88	133.96	1	46	113.09	1	1	1	1	1	1	5.6	0	0		2	1	74.86
2	104.33	1	1	10	0	5	34	1	55	1.57	22.31	2	1	1	76	130	80				2	1		149.08	130.78	1	61.8	61.2	1	1	1	1	1	1	4.2	1	1		1	0	106.16
2	102.87	1	1	10	0	5	36	1	86.5	1.73	28.9	1	0	0	95	130	90				2	1		183.24	144.1	1	48.2	77.68	1	1	1	1	1	0	7.1	1	1		1	0	109.73
2	100.02	1	1	20	0	5	40	1	80.5	1.69	28.19	1	0	0	97	130	80				2	1		188	149.5	1	48	97.19	1	1	1	1	1	0	6.2	1	1		2	1	89
2	82.16	1	1	10	3	4	68	0	57.5	1.51	25.22	1	0	0	86	115	80				2	1		222.42	174.78	0	53.7	83.3	1	1	0	0	0	1	4.3	1	1		2	1	99.23
2	85.1	1	1	10	3	4	63	0	77	1.5	34.22	0	0	0	98	125	83	0	0	1	0	0		291.73	233.11	0	46.4	98.1	1	1	0	0	0	0	6.65	1	1		1	0	104.88
2	83.91	1	1	20	3	4	65	0	87	1.64	32.35	0	0	0	99	130	80				2	1		224.7	124.63	1	53.4	86.37	1	1	1	0	1	0	6.92	1	1		2	1	69.03
2	85.1	1	1	10	3	4	63	0	66	1.5	29.33	1	0	0	89	119	81	0	0	1	0	0		216.39	310.47	0	33	121.3	1	0	0	0	0	0	6.9	0	0	6.6	0	0	129.3
2	81.02	1	1	10	3	4	70	0	66	1.65	24.24	2	1	1	70	110	80				2	1		166.2	114.82	1	66.9	87.3	1	1	1	1	1	1	4.1	1	1		2	1	78.94
2	79.73	1	1	10	3	4	70	0	49	1.48	22.37	2	1	1	72	120	80				2	1		144.3	132.11	1	48.3	92.3	1	1	1	1	1	1	4.1	1	1		2	1	88.6
2	95.71	1	1	10	0	5	44	1	59.5	1.62	22.67	2	1	1	71	120	80				2	1		110.92	146.2	1	59.2	99.3	1	1	1	1	1	1	5.3	1	1		2	1	84.42
2	98.43	1	1	10	0	5	40	1	70	1.56	28.76	1	0	0	88	120	70				2	1		192.44	131.01	1	47	99.94	1	1	1	1	1	1	5.6	1	1		2	1	87.42
2	100.53	1	1	10	0	5	37	1	67	1.66	24.31	2	1	1	75	120	80				2	1		198.37	137.18	1	40	92.1	1	1	1	1	1	1	4.2	1	1		2	1	62.13
2	84.93	1	1	10	3	4	61	0	65	1.54	27.41	1	0	0	88	120	70				2	1		194.01	133.32	1	56	78.33	1	1	1	1	1	0	6.6	1	1		1	0	117.64
2	99.13	1	1	10	0	5	39	1	62	1.57	25.15	1	0	0	81	120	80				2	1		197.36	88.51	1	64	73.3	1	1	1	1	1	1	4.3	1	1		2	1	77.82
2	99.13	1	1	20	0	5	39	1	62.5	1.56	25.68	1	0	0	82	120	80				2	1		148.2	74.05	1	58.8	99.2	1	1	1	1	1	0	6.66	1	1		1	0	116.99
2	93.05	1	1	10	0	5	48	1	82	1.55	34.13	0	0	0	104	130	80				2	1		157.4	182.66	1	36	84.87	1	0	0	1	0	0	7.2	1	1		2	1	89.11
2	95.04	1	1	10	0	5	45	1	65	1.6	25.39	1	0	0	82	110	70				2	1		198.74	68.74	1	42.7	98.2	1	1	1	1	1	1	5.2	1	1		2	1	87.96
2	100.53	1	1	10	0	5	37	1	70	1.55	29.14	1	0	0	93	125	80				2	1		164.99	128.68	1	42.1	97.15	1	1	1	1	1	0	6.7	1	1		2	1	82.77
2	90.48	1	1	10	0	5	52	1	63	1.57	25.56	1	0	0	82	120	70				2	1		174.32	115.64	1	53.2	117.2	1	1	1	1	1	1	5.1	1	1		2	1	93.53
2	94.37	1	1	10	0	5	46	1	74	1.6	28.91	1	0	0	89	120	70				2	1		194.11	146	1	56	90.3	1	1	1	1	1	0	6.1	1	1		2	1	89.92
2	107.85	1	1	10	0	5	27	1	61	1.56	25.07	1	0	0	81	110	60				2	1		160.76	108.64	1	58.9	88.3	1	1	1	1	1	1	5.5	1	1		1	0	110.58
2	101.95	1	1	10	0	5	35	1	55	1.62	20.96	2	1	1	73	100	70				2	1		188.3	132.2	1	61.1	78.3	1	1	1	1	1	0	6.6	1	1		1	0	113.18
2	96.38	1	1	10	0	5	43	1	67	1.53	28.62	1	0	0	88	120	80				2	1		180.78	102.43	1	49.1	111.19	1	1	1	1	1	1	5.77	1	1		2	1	86.25
2	101.24	1	1	10	0	5	36	1	65	1.68	23.03	2	1	1	70	110	70				2	1		127.29	49.29	1	41.9	75.53	1	1	1	1	1	1	4.32	1	1		2	1	80.07
2	97.74	1	1	10	0	5	41	1	53	1.62	20.2	2	1	1	73	110	60				2	1		139.1	116.71	1	51	78.2	1	1	1	1	1	1	4.2	0	1		2	1	80.97
2	104.86	1	1	10	0	5	31	1	60	1.6	23.44	2	1	1	72	130	70				2	1		170.63	88.58	1	60	92.91	1	1	1	1	1	1	3.9	1	1		2	1	68.83
2	91.11	1	1	10	0	5	51	1	50	1.51	21.93	2	1	1	72	110	80				2	1		137.32	132.73	1	51	91.3	1	1	1	1	1	1	4.2	1	1		2	1	74.24
2	100.53	1	1	10	0	5	37	1	66	1.78	20.83	2	1	1	70	120	80				2	1		181.27	134.46	1	43	81.77	1	1	1	1	1	1	3.1	1	1		2	1	70.35
2	91.76	1	1	10	0	5	50	1	60	1.52	25.97	1	0	0	84	120	80				2	1		133.3	112.61	1	41	66.8	1	1	1	1	1	1	4.9	1	1		2	1	87.38
2	101.95	1	1	10	0	5	35	1	59	1.6	23.05	2	1	1	70	130	70				2	1		181.69	105.59	1	44	116.57	1	1	1	1	1	1	5.2	1	1		2	1	72.54
2	103.39	1	1	10	0	5	33	1	58	1.62	22.1	2	1	1	70	120	75				2	1		221.74	141.3	1	55	88.6	1	1	1	0	0	1	3.5	0	1		2	1	79.66
2	103.39	1	1	10	0	5	33	1	52	1.55	21.64	2	1	1	71	110	70				2	1		182.5	58	1	62	88.3	1	1	1	1	1	0	6.1	1	1		2	1	63.19
2	100.53	1	1	10	0	5	37	1	51	1.56	20.96	2	1	1	73	120	70				2	1		106.32	97.69	1	45	55.32	1	1	1	1	1	0	6.6	1	1		2	1	61.47
2	99.83	1	1	10	0	5	38	1	54	1.57	21.91	2	1	1	69	110	60				2	1		168.3	105.19	1	46	91.26	1	1	1	1	1	1	3.2	0	1		2	1	64.63
2	86.74	1	1	10	3	4	58	1	71	1.58	28.44	1	0	0	88	130	80				2	1		193.6	141.17	1	49	94.77	1	1	1	1	1	0	7.8	1	1		2	1	78.67
2	95.04	1	1	10	0	5	45	1	62	1.52	26.84	1	0	0	87	100	70				2	1		155.45	103.83	1	51.3	83.38	1	1	1	1	1	1	5.55	1	1		2	1	80.4
2	98.43	1	1	10	0	5	40	1	70	1.56	28.76	1	0	0	88	120	70				2	1		192.44	131.01	1	57	99.94	1	1	1	1	1	1	5.6	1	1		2	1	87.42
2	100.53	1	1	10	0	5	37	1	67	1.66	24.31	2	1	1	70	90	80				2	1		198.37	137.2	1	40	92.1	1	1	1	1	1	1	4.2	1	1		2	1	62.13
2	82	1	1	20	3	4	66	0	59	1.62	22.48	2	1	1	72	120	80				2	1		130.05	127.79	1	54.9	56.78	1	1	1	1	1	1	4.32	0	1		2	1	96.17
2	78.62	1	1	10	3	4	72	0	64.5	1.64	23.98	2	1	1	70	100	80				2	1		132.33	135.78	1	66.2	82.3	1	1	1	1	1	1	3.7	1	1		1	0	104.16
2	80.29	1	1	10	3	4	69	0	62	1.64	23.05	2	1	1	70	120	80				2	1		183.2	87.82	1	85	113.59	1	1	1	1	1	1	4.3	1	1		2	1	55.59
2	82.58	1	1	20	3	4	65	0	68	1.6	26.56	1	0	0	88	150	80				2	1		239.15	139.01	1	51.3	89.3	1	1	1	0	0	0	6.33	1	1		2	1	95.85
2	82	1	1	20	3	4	66	0	59	1.6	23.05	2	1	1	68	110	80				2	1		130.05	127.79	1	54.9	56.78	1	1	1	1	1	1	4.32	0	1		2	1	96.17
2	96.38	1	1	10	0	5	43	1	55.5	1.6	21.68	2	1	1	73	110	70				2	1		230.37	116.74	1	41.5	85.32	1	1	1	0	0	1	3.3	1	1		2	1	86.82
2	92.24	1	1	20	0	5	47	1	62	1.64	23.05	2	1	1	75	120	70				2	1		134.76	82.33	1	51.2	67.32	1	1	1	1	1	1	4.2	1	1		2	1	95.24
2	85.38	1	1	20	3	4	58	1	89	1.65	32.69	0	0	0	98	140	90				1	0		202.63	117.46	1	37.9	141.24	0	0	1	0	0	1	4.88	1	1		2	1	70.18
2	83.6	1	1	10	3	4	61	0	72	1.62	27.43	1	0	0	88	140	90				1	0		178.76	123.48	1	31.2	122.86	1	0	1	1	0	0	6.6	1	1		1	0	119.17
2	88.43	1	1	10	3	4	53	1	84	1.62	32.01	0	0	0	91	155	110				1	0		220.32	87.22	1	40.2	150.18	0	1	1	0	0	1	5.8	1	1		2	1	88.11
2	92.24	1	1	10	0	5	47	1	78	1.75	25.47	1	0	0	85	123	81	0	0	1	0	0		149.56	187.67	1	36	106.03	1	0	0	1	0	1	4.2	1	1		2	1	69.71
2	84.19	1	1	10	3	4	60	0	61	1.5	27.11	1	0	0	89	129	83	0	0	1	0	0		179.27	99.77	1	40.7	118.62	1	1	1	1	1	1	4.2	1	1		2	1	97.24
2	91.6	1	1	10	0	5	48	1	72	1.56	29.59	1	0	0	92	119	76	0	0	1	0	0		119.3	144.1	1	37.1	131.52	0	0	1	1	0	0	6.7	0	1		1	0	108.11
2	102.49	1	1	10	0	5	32	1	64.5	1.5	28.67	1	0	0	89	110	80				2	1		153.28	160.57	1	37.5	83.67	1	0	0	1	0	1	5.6	1	1		2	1	99.34
2	96.21	1	1	10	0	5	41	1	71	1.6	27.73	1	0	0	89	120	60				2	1		171.76	146.2	1	58.8	123.62	1	1	1	1	1	1	5.67	1	1		2	1	67.35
2	97.57	1	1	10	0	5	39	1	59.5	1.52	25.75	1	0	0	82	120	80				2	1		165.84	69.15	1	41.7	110.31	1	1	1	1	1	1	3.96	0	1		2	1	86.47
2	106.15	1	1	10	0	5	27	1	46.2	1.56	18.98	2	1	1	68	110	80				2	1		155.2	81.97	1	53.7	85.2	1	1	1	1	1	1	3	1	1		2	1	97.6
2	99.65	1	1	10	0	5	36	1	54	1.61	20.83	2	1	1	69	100	70				2	1		193.19	145.2	1	90.2	89.32	1	1	1	1	1	0	6.7	0	1		1	0	112.22
2	99.65	1	1	10	0	5	36	1	64	1.5	28.44	1	0	0	89	110	70				2	1		192.3	148.88	1	50	85.55	1	1	1	1	1	0	6.2	1	1		2	1	85.34
2	104.67	1	1	10	0	5	29	1	50	1.61	19.29	2	1	1	66	110	70				2	1		137.37	94.24	1	51	66.2	1	1	1	1	1	1	3.12	1	1		2	1	86.98
2	104.67	1	1	10	0	5	29	1	50.5	1.6	19.73	1	1	1	74	110	70				2	1		133.09	75.71	1	71	66.87	1	1	1	1	1	1	5.7	1	1		2	1	76.81
2	87.2	1	1	10	3	4	55	1	60	1.54	25.3	1	0	0	86	120	80				2	1		180.41	52.76	1	64	105.86	1	1	1	1	1	1	5.2	1	1		2	1	80.37
2	107.66	1	1	26	0	5	25	1	60	1.62	22.86	2	1	1	70	110	80				2	1		110.72	142.43	1	45.1	97.13	1	1	1	1	1	0	6.2	1	1		2	1	82.2
2	90.95	1	1	10	0	5	49	1	57	1.63	21.45	2	1	1	71	130	80				2	1		185.32	142.2	1	57.5	99.2	1	1	1	1	1	1	4.23	1	1		2	1	80.1
2	103.94	1	1	10	0	5	30	1	75	1.65	27.55	1	0	0	95	120	80				2	1		145.31	142.52	1	47	79.81	1	1	1	1	1	1	5.6	1	1		2	1	72.58
2	85.38	1	1	20	3	4	58	1	89	1.65	32.69	0	0	0	98	140	90	1	0	0	0	0		202.63	117.46	1	37.9	141.24	0	0	1	0	0	1	5.88	1	1		2	1	70.18
2	83.6	1	1	10	3	4	61	0	72	1.62	27.43	1	0	0	88	122	78	0	0	1	0	0		178.76	123.48	1	31.2	122.86	1	0	1	1	0	1	5.5	1	1		1	0	119.17
2	97.57	1	1	10	0	5	39	1	86	1.65	31.59	0	0	0	93	110	80				2	1		234.69	230.95	1	36.8	121.6	1	0	0	0	0	1	5.5	1	0		2	1	92.69
2	95.54	1	1	20	0	5	42	1	86.5	1.68	30.65	0	0	0	98	123	82	0	0	1	0	0		237.63	145.47	1	69.7	138.84	0	1	1	0	0	1	5.6	1	0		2	1	94.1
2	92.24	1	1	10	0	5	47	1	78	1.75	25.47	1	0	0	85	110	80				2	1		149.56	137.87	1	56	88.3	1	1	1	1	1	1	5.2	1	1		2	1	69.71
2	88.43	1	1	10	3	4	53	1	88	1.62	33.53	0	0	0	91	160	110	1	0	0	0	0		220.32	87.22	1	52.7	150.18	0	1	1	0	0	1	5.8	1	1		2	1	88.11
2	92.24	1	1	10	0	5	47	1	80	1.75	26.12	1	0	1	79	130	80				2	1		152.2	131.8	1	32	99.3	1	0	1	1	0	1	3.2	1	1		2	1	69.71
2	103.94	1	1	10	0	5	30	1	75	1.65	27.55	1	0	0	92	130	80				2	1		145.31	142.52	1	47	79.81	1	1	1	1	1	1	5.6	1	1		2	1	72.58
2	89.69	1	1	10	3	4	51	1	67.5	1.64	25.1	1	0	0	82	120	80				2	1		170.89	133.2	1	54	107.84	1	1	1	1	1	1	5.6	0	0		2	1	59.88
2	96.89	1	1	10	0	5	40	1	76.7	1.69	26.85	1	0	0	86	110	70				2	1		193.11	144.32	1	42	83.3	1	1	1	1	1	1	5.33	1	1		2	1	88.18
2	87.81	1	1	10	3	4	54	1	80	1.6	31.25	0	0	0	98	125	79	0	0	1	0	0		226.78	158.47	0	36.7	128.39	1	0	0	0	0	0	7.1	1	1		1	0	118.18
2	76.84	1	1	10	3	4	73	0	62	1.51	27.19	1	0	0	90	120	80				2	1		196.11	148.32	1	67.9	88.79	1	1	1	1	1	1	4.18	0	1		2	1	98.98
2	73.67	1	1	20	3	4	79	0	60	1.55	24.97	2	1	0	81	130	80				2	1		185.33	96.94	1	66.1	99.3	1	1	1	1	1	1	4.35	0	1		2	1	95.22
2	83.02	1	1	10	3	4	62	0	66	1.69	23.11	2	1	1	71	120	80				2	1		198.81	116.21	1	52	93.57	1	1	1	1	1	1	4.2	0	0		2	1	72.94
2	78.48	1	1	10	3	4	70	0	70.5	1.61	27.2	1	0	0	92	110	70				2	1		179.8	142.79	1	51.5	89.3	1	1	1	1	1	1	5.1	1	1		2	1	90.81
2	76.31	1	1	10	3	4	74	0	59	1.65	21.67	2	1	1	70	110	60				2	1		180.66	122.41	1	48.5	97.1	1	1	1	1	1	1	4.1	1	1		2	1	71.16
2	82.43	1	1	10	3	4	63	0	70.5	1.53	30.12	0	0	0	99	100	80				2	1		161.3	144.3	1	57.9	79.3	1	1	1	1	1	1	4.7	1	1		2	1	91.39
2	80.15	1	1	10	3	4	67	0	66	1.6	25.78	1	0	0	85	140	90				1	0		252.2	210.99	0	58.3	99.3	1	1	0	0	0	0	6.7	1	1	13.3	2	1	81.04
2	75.24	1	1	20	3	4	76	0	60	1.56	24.65	2	1	0	86	120	80				2	1		185.33	96.94	1	66.1	99.3	1	1	1	1	1	1	4.35	0	1		2	1	95.22
2	83.02	1	1	10	3	4	62	0	66	1.63	24.84	2	1	1	72	110	80				2	1		198.81	116.21	1	52	83.57	1	1	1	1	1	1	4.2	0	0		2	1	72.94
2	83.02	1	1	10	3	4	62	0	66	1.63	24.84	2	1	1	70	120	80				2	1		198.81	136.11	1	42.8	78.38	1	1	1	1	1	1	4.2	0	0		2	1	72.94
2	79.59	1	1	10	3	4	68	0	75	1.62	28.58	1	0	0	98	120	80				2	1		129.06	115.08	1	44	72.04	1	1	1	1	1	1	3.9	1	1		2	1	59.16
2	94.21	1	1	10	0	5	44	1	55	1.6	21.48	2	1	1	72	120	70				2	1		173.55	118.14	1	64	85.2	1	1	1	1	1	1	4.23	1	1		2	1	82.78
2	96.74	1	1	10	0	5	38	1	64.5	1.58	25.84	1	0	0	85	130	80				2	1		173.77	144.02	1	57.5	96.2	1	1	1	1	1	1	5.2	1	1		2	1	99.26
2	87.68	1	1	10	3	4	52	1	60	1.6	23.44	2	1	1	76	110	70				2	1		190.25	117.52	1	40.2	96.7	1	1	1	1	1	1	5.6	1	1		2	1	83.43
2	88.92	1	1	10	3	4	50	1	66	1.52	28.57	1	0	0	89	100	80				2	1		180.49	115.42	1	46.6	90.33	1	1	1	1	1	0	6.88	0	1		1	0	103.76
2	83.47	1	1	10	3	4	59	1	66	1.53	28.19	1	0	0	89	126	83	0	0	1	0	0		184.94	125.89	1	50	109.76	1	1	1	1	1	1	5.2	1	1		2	1	81.13
2	85.25	1	1	10	3	4	56	1	82	1.6	32.03	0	0	0	101	120	75				2	1		177.07	142.76	1	54	94.32	1	1	1	1	1	1	4.3	1	1		2	1	77.26
2	94.06	1	1	10	0	5	42	1	51.5	1.59	20.37	2	1	1	69	110	80				2	1		168.21	79.53	1	49.3	66.34	1	1	1	1	1	1	3.3	1	1		2	1	81.98
2	91.45	1	1	10	0	5	46	1	67	1.53	28.62	1	0	0	89	120	80				2	1		150.97	106.64	1	54.3	95.34	1	1	1	1	1	1	4.8	1	1		2	1	75.65
2	92.1	1	1	20	0	5	45	1	64.5	1.53	27.55	1	0	0	82	120	80				2	1		192.54	191.59	1	52.5	101.72	1	1	0	1	0	1	5.8	1	1		1	0	104.6
2	93.4	1	1	10	0	5	43	1	60	1.55	24.97	2	1	0	83	110	80				2	1		187.77	89.97	1	69.2	100.58	1	1	1	1	1	1	4.2	1	1		2	1	77.43
2	102.33	1	1	10	0	5	30	1	58	1.62	22.1	2	1	1	73	110	60				2	1		190.1	93.56	1	49	98.1	1	1	1	1	1	1	4.1	1	0		2	1	67.48
2	105.99	1	1	20	0	5	25	1	65	1.7	22.49	2	1	1	71	120	80				2	1		206.95	108.61	1	53.8	151.43	0	1	1	0	0	1	4.52	1	1	8.4	2	1	85.52
2	102.33	1	1	10	0	5	30	1	57	1.61	21.99	2	1	1	70	130	70				2	1		157.66	79.49	1	51.8	110.06	1	1	1	1	1	1	3.3	1	1		2	1	91.71
2	87.68	1	1	20	3	4	52	1	56	1.63	21.08	2	1	1	73	114	73	0	0	1	0	0		178.22	111.08	1	53.5	69.2	1	1	1	1	1	0	6.8	1	1		1	0	125.92
2	100.9	1	1	20	0	5	32	1	70	1.56	28.76	1	0	0	91	120	70				2	1		229.61	50.43	1	50.7	168.82	0	1	1	0	0	1	5.6	1	1		2	1	95.37
2	87.07	1	1	10	3	4	53	1	88	1.63	33.12	0	0	0	102	120	80				2	1		190.94	137.21	1	44.5	119	1	1	1	1	1	0	7.1	0	1		2	1	95.09
2	102.33	1	1	10	0	5	30	1	76	1.68	26.93	1	0	0	83	100	80				2	1		159.32	144.56	1	57.2	128.13	1	1	1	1	1	0	6.3	1	1		1	0	107.42
2	96.74	1	1	10	0	5	38	1	63	1.55	26.22	1	0	0	87	110	80				2	1		186.41	101.27	1	43	93.2	1	1	1	1	1	1	3.51	1	1		2	1	65.76
2	103.05	1	1	10	0	5	29	1	59	1.63	22.21	2	1	1	70	120	80				2	1		164.41	73.02	1	42	89.22	1	1	1	1	1	1	3.9	1	1		2	1	73.48
2	90.18	1	1	10	0	5	48	1	64	1.62	24.39	2	1	1	71	100	80				2	1		172.43	108.46	1	40	110.74	1	1	1	1	1	1	4.23	1	1		2	1	75.73
2	95.39	1	1	10	0	5	40	1	68	1.59	26.9	1	0	0	86	130	70				2	1		194.96	132.03	1	54	94.55	1	1	1	1	1	1	5.7	1	1		2	1	72.15
2	94.72	1	1	10	0	5	41	1	62	1.55	25.81	1	0	0	86	130	80				2	1		188.3	145.2	1	41.3	85.32	1	1	1	1	1	1	4.8	1	0		2	1	88.3
2	99.5	1	1	10	0	5	34	1	59.5	1.62	22.67	2	1	1	68	110	80				2	1		178.34	143.22	1	46.3	83.33	1	1	1	1	1	1	4.2	0	1		2	1	88.4
2	96.06	1	1	10	0	5	39	1	55	1.56	22.6	2	1	1	72	120	80				2	1		154	144	1	48	66.3	1	1	1	1	1	1	4.32	1	1		2	1	80
2	103.78	1	1	10	0	5	28	1	50	1.51	21.93	2	1	1	69	130	70				2	1		160.08	40.33	1	42.8	109.21	1	1	1	1	1	1	3.33	1	1		2	1	73.77
2	105.99	1	1	20	0	5	25	1	53	1.7	18.34	2	1	1	67	100	60				2	1		125.37	108.28	1	50.7	53.01	1	1	1	1	1	1	3.22	1	1		2	1	76.86
2	102.33	1	1	10	0	5	30	1	58	1.62	22.1	2	1	1	72	110	70				2	1		148.46	59.67	1	47.4	99.2	1	1	1	1	1	1	4.23	1	1		2	1	87.65
2	84.06	1	1	20	3	4	58	1	68	1.5	30.22	0	0	0	90	130	80				2	1		138.26	348.91	1	33	145.48	0	0	0	1	0	0	6.2	1	1		2	1	47.68
2	100.2	1	1	10	0	5	33	1	74	1.67	26.53	1	0	0	87	120	70				2	1		151.92	133.2	1	41	66.45	1	1	1	1	1	1	4.5	0	1		2	1	68.47
2	87.68	1	1	10	3	4	52	1	60	1.6	23.44	2	1	1	70	105	70				2	1		190.25	117.52	1	40.2	96.7	1	1	1	1	1	1	5.6	1	1		2	1	83.43
2	85.25	1	1	10	3	4	56	1	82	1.6	32.03	0	0	0	101	120	75				2	1		147.32	142.76	1	54	94.23	1	1	1	1	1	1	4.3	1	1		2	1	77.26
2	91.45	1	1	10	0	5	46	1	67	1.53	28.62	1	0	0	89	120	80				2	1		150.97	106.64	1	44.3	95.34	1	1	1	1	1	1	4.8	1	1		2	1	75.65
2	90.18	1	1	10	0	5	48	1	67	1.65	24.61	2	1	1	73	130	70				2	1		149.1	113.58	1	47	78.32	1	1	1	1	1	1	5.7	1	1		2	1	82.42
2	83.47	1	1	10	3	4	59	1	66	1.53	28.19	1	0	0	89	110	80				2	1		184.94	125.89	1	50	109.76	1	1	1	1	1	1	5.2	1	1		2	1	81.13
2	85.25	1	1	10	3	4	56	1	82	1.6	32.03	0	0	0	101	110	75				2	1		156.2	142.76	1	54	89.31	1	1	1	1	1	1	4.3	1	1		2	1	77.26
2	91.45	1	1	10	0	5	46	1	67	1.53	28.62	1	0	0	89	120	80				2	1		150.97	106.64	1	54.3	95.34	1	1	1	1	1	1	4.8	1	1		2	1	75.65
2	90.18	1	1	10	0	5	48	1	67	1.65	24.61	2	1	1	70	110	70				2	1		149.1	113.58	1	47	78.32	1	1	1	1	1	1	5.7	1	1		2	1	82.42
2	82.89	1	1	10	3	4	60	0	76	1.45	36.15	0	0	0	99	140	90				1	0		230.18	276.01	0	74.2	130.1	0	1	0	0	0	1	6.9	1	1	9.3	0	0	163.28
2	96.74	1	1	10	0	5	38	1	76	1.57	30.83	0	0	0	98	120	80				2	1		213.1	146	1	38	149.8	0	0	1	1	0	1	5.6	1	1		2	1	97
2	90.81	1	1	10	0	5	47	1	80.5	1.67	28.86	1	0	0	97	121	82	0	0	1	0	0		150	145.3	1	56.3	64.64	1	1	1	1	1	0	6.8	1	1		1	0	107
2	101.62	1	1	10	0	5	31	1	91	1.76	29.38	1	0	0	98	120	70				2	1		179.04	50.53	1	63	105.93	1	1	1	1	1	0	6.45	1	0		2	1	74.5
2	92.75	1	1	10	0	5	44	1	76	1.67	27.25	1	0	0	94	120	70				2	1		165	139.2	1	41	86.16	1	1	1	1	1	1	5.7	1	0		2	1	98
2	100.9	1	1	10	0	5	32	1	62.5	1.68	22.14	2	1	1	70	120	80				2	1		188.3	104.71	1	53	94.23	1	1	1	1	1	1	4.1	0	0		2	1	97
2	102.33	1	1	10	0	5	30	1	78.5	1.73	26.23	1	0	0	84	120	80				2	1		184.3	127.76	1	45	113.45	1	1	1	1	1	1	5.32	1	1		2	1	93
2	103.05	1	1	10	0	5	29	1	71.5	1.72	24.17	2	1	1	70	110	70				2	1		123	126.3	1	41	99.32	1	1	1	1	1	1	4.1	1	1		2	1	88
2	103.78	1	1	10	0	5	28	1	74.5	1.71	25.48	1	0	0	86	120	70				2	1		193.3	145.77	1	43	111.85	1	1	1	1	1	1	5.45	0	1		2	1	97
2	73.04	1	1	10	3	4	78	0	68.8	1.6	26.87	1	0	0	82	140	90				1	0		183.1	147.77	1	65.6	98.32	1	1	1	1	1	1	4.8	1	1		1	0	123.37
2	81.73	1	1	20	3	4	62	0	55	1.64	20.45	2	1	1	72	130	70				2	1		133.38	145.1	1	49	97.3	1	1	1	1	1	1	5.7	1	1		1	0	112.96
2	77.26	1	1	10	3	4	70	0	65	1.52	28.13	1	0	0	89	122	83	0	0	1	0	0		216.33	178.3	0	52.5	142.74	0	1	0	0	0	1	5.8	1	1		2	1	98.72
2	73.04	1	1	10	3	4	78	0	68.8	1.6	26.87	1	0	0	88	119	78	0	0	1	0	0		183.1	147.77	1	65.6	98.32	1	1	1	1	1	1	4.8	1	1		1	0	123.37
2	94.06	1	1	10	0	5	42	1	62.5	1.68	22.14	2	1	1	71	110	70				2	1		179	145.22	1	42	81.23	1	1	1	1	1	1	4.1	0	0		2	1	86
2	93.4	1	1	10	0	5	43	1	70	1.56	28.76	1	0	0	99	110	90				2	1		244.3	133.9	1	73.3	102.3	1	1	1	0	0	0	6.3	1	1		1	0	100.65
2	96.74	1	1	10	0	5	38	1	47	1.53	20.08	2	1	1	71	120	70				2	1		188.3	144.4	1	42.33	95.33	1	1	1	1	1	1	4.6	1	1		2	1	78.44
2	82.2	1	1	10	3	4	59	1	68	1.53	29.05	1	0	0	89	110	80				2	1		184.73	135.22	1	49.2	103.3	1	1	1	1	1	1	4.8	1	1		2	1	81.13
2	90.06	1	1	10	0	5	46	1	57	1.6	22.27	2	1	1	72	120	70				2	1		183.2	90.14	1	68.8	116.81	1	1	1	1	1	1	4.2	0	1		2	1	93.13
2	82.78	1	1	10	3	4	58	1	76.5	1.58	30.64	0	0	0	91	125	82	0	0	1	0	0		233.22	295.24	0	52.8	121.37	1	1	0	0	0	1	5.66	1	1		1	0	103.4
2	82.2	1	1	20	3	4	59	1	78	1.55	32.47	0	0	0	92	140	90				1	0		176.96	75.69	1	39	122.82	1	0	1	1	0	1	4.3	1	1		2	1	78
2	97.29	1	1	10	0	5	35	1	66	1.5	29.33	1	0	0	94	110	80				2	1		169.27	143.22	1	55	85	1	1	1	1	1	1	3.7	1	1		2	1	71.49
2	92.62	1	1	10	0	5	42	1	62	1.5	27.56	1	0	0	90	120	60				2	1		186.76	136.67	1	50.6	108.83	1	1	1	1	1	1	5.52	1	1		2	1	53.2
2	94.59	1	1	10	0	5	39	1	51	1.55	21.23	2	1	1	63	120	70				2	1		194.25	110.65	1	40.6	97.6	1	1	1	1	1	1	4.32	1	1		2	1	95.8
2	87.56	1	1	20	3	4	50	1	74	1.55	30.8	0	0	0	92	121	81	0	0	1	0	0		215.3	166.61	0	31	126	1	0	0	0	0	0	7.1	0	0		1	0	100.64
2	97.98	1	1	10	0	5	34	1	68	1.6	26.56	1	0	0	87	120	80				2	1		164.2	149.2	1	63	109.32	1	1	1	1	1	1	5.1	1	1		1	0	103.6
2	90.06	1	1	10	0	5	46	1	85	1.59	33.62	0	0	0	98	140	90	1	0	1	0	0		142.08	73.15	1	45.3	82.15	1	1	1	1	1	1	4.9	1	1		2	1	94.27
2	102.91	1	1	10	0	5	27	1	68	1.54	28.67	1	0	0	89	120	60				2	1		170.52	131.23	1	53	91.27	1	1	1	1	1	1	4.2	0	1		2	1	55.68
2	94.59	1	1	10	0	5	39	1	68.5	1.64	25.47	1	0	0	86	110	80				2	1		178.36	50.78	1	73.1	119.2	1	1	1	1	1	1	4.2	1	1		1	0	110.77
2	100.77	1	1	10	0	5	30	1	56.1	1.63	21.11	2	1	1	69	110	70				2	1		191.84	171.41	1	60.7	96.86	1	1	0	1	0	1	4.1	1	1		2	1	87.24
2	102.19	1	1	10	0	5	28	1	53	1.56	21.78	2	1	1	69	110	60				2	1		177.1	75.86	1	48	67.3	1	1	1	1	1	1	5.3	1	1		1	0	104.29
2	91.97	1	1	10	0	5	43	0	95	1.66	34.48	0	0	0	106	140	90				1	0		172.64	96.58	1	31.1	122.22	1	0	1	1	0	0	6.8	1	1		2	1	79.53
2	79.7	1	1	10	3	4	50	1	56	1.59	22.15	2	1	1	69	120	80				2	1		195.69	78.16	1	43.5	88.2	1	1	1	1	1	1	4.1	1	1		2	1	80.94
2	89.43	1	1	10	3	4	47	1	73	1.55	30.39	0	0	0	93	122	81	0	0	1	0	0		213.2	151.2	0	50.2	137.2	0	1	0	0	0	0	6.6	1	1		2	1	93.21
2	91.33	1	1	10	0	5	44	1	80	1.59	31.64	0	0	0	103	120	80				2	1		302.19	157.85	0	67	173.82	0	1	0	0	0	1	3.4	0	1		2	1	92.14
2	85.73	1	1	10	3	4	53	1	72.5	1.55	30.18	0	0	0	101	140	90				1	0		261.72	106.5	1	50.5	189.92	0	1	1	0	0	0	7.3	1	1		1	0	106.57
2	89.43	1	1	10	3	4	47	1	65	1.53	27.77	1	0	0	96	120	70				2	1		194.85	60.31	1	52.6	130.19	0	1	1	1	0	1	5.2	1	1		2	1	59.33
2	85.73	1	1	10	3	4	53	1	69.5	1.6	27.15	1	0	0	87	130	70				2	1		225.35	221.08	0	52.7	128.43	1	1	0	0	0	0	6.2	0	1		2	1	84.27
2	90.06	1	1	10	0	5	46	1	69.5	1.61	26.81	1	0	0	87	125	85				2	1		162.86	225.49	1	45	82.76	1	1	0	1	0	1	5.2	1	1		2	1	89.08
2	102.91	1	1	10	0	5	27	1	59	1.63	22.21	2	1	1	69	120	70				2	1		171.44	66.03	1	42	92.1	1	1	1	1	1	1	6.1	0	0		2	1	61.61
2	100.06	1	1	10	0	5	31	1	66	1.65	24.24	2	1	1	71	120	60				2	1		159.52	164.27	1	41	85.67	1	1	0	1	0	1	4.6	1	1		2	1	79.21
2	102.19	1	1	10	0	5	28	1	64.5	1.6	25.2	1	0	0	81	130	70				2	1		230.41	63.66	1	59	109.1	1	1	1	0	0	1	4.22	0	1		2	1	79.96
2	90.69	1	1	10	0	5	45	1	49.5	1.5	22	2	1	1	70	120	80				2	1		218.63	189.44	0	45	95.44	1	1	0	0	0	1	4.23	1	1		2	1	63.9
2	92.62	1	1	23	0	5	42	1	80	1.59	31.64	0	0	0	97	110	90				2	1		199.3	211.11	1	37	109.82	1	0	0	1	0	0	7.23	0	1		1	0	104.57
2	100.06	1	1	10	0	5	31	1	62	1.53	26.49	1	0	0	86	120	75				2	1		189.9	121.03	1	49	96.69	1	1	1	1	1	1	5.1	1	1		2	1	68.73
2	94.59	1	1	10	0	5	39	1	51	1.52	22.07	2	1	1	66	110	70				2	1		178.1	114.2	1	46	86.8	1	1	1	1	1	1	4.23	1	1		2	1	69.84
2	91.33	1	1	10	0	5	44	1	83	1.65	30.49	0	0	0	98	120	80				2	1		220	288.2	0	44	111.2	1	1	0	0	0	0	6.8	1	1		2	1	61
2	91.97	1	1	10	0	5	43	1	75	1.64	27.89	1	0	0	86	125	85				2	1		193	100	1	49	94.2	1	1	1	1	1	0	6.23	1	1		2	1	95
2	87.56	1	1	20	3	5	50	1	77	1.61	29.71	1	0	0	96	110	80				2	1		221	129.34	1	52	143.13	0	1	1	0	0	1	5.5	1	1		1	0	106.2
2	99.36	1	1	10	0	5	32	1	53.5	1.6	20.9	1	1	1	72	125	80				2	1		147.91	179.3	1	42	90.05	1	1	0	1	1	1	4.1	1	1		2	1	66.11
2	83.36	1	1	10	3	4	57	1	70.5	1.51	30.92	0	0	0	97	150	100				1	0		164.18	94.64	1	51	94.25	1	1	1	1	1	0	6.9	1	1		2	1	72.96
2	86.34	1	1	10	3	4	52	1	70	1.58	28.04	1	0	0	88	140	100				1	0		225.58	134.8	1	59	109.62	1	1	1	0	0	0	6.6	1	1		2	1	68.06
2	88.18	1	1	10	3	4	49	1	62	1.57	25.15	1	0	0	84	120	80				2	1		197.28	114.91	1	46	108.2	1	1	1	1	1	0	7.1	1	1		2	1	75.82
2	84.54	1	1	20	3	4	55	1	75	1.58	30.04	0	0	0	92	131	79	0	0	1	0	0		179.87	144.84	1	39	111.9	1	0	1	1	0	0	7.2	1	1		2	1	80.42
2	100.77	1	1	10	0	5	30	1	57	1.6	22.27	2	1	1	71	110	70				2	1		199.85	140.32	1	52	109.78	1	1	1	1	1	1	4.2	1	0		2	1	88.3
2	88.18	1	1	20	3	4	49	1	78	1.55	32.47	0	0	0	92	130	80				2	1		176.96	75.69	1	49	92.82	1	1	1	1	1	1	4.3	1	1		2	1	78
2	97.29	1	1	10	0	5	35	1	66	1.5	29.33	1	0	0	97	125	80				2	1		169.27	143.22	1	55	105.63	1	1	1	1	1	1	3.7	1	1		2	1	71.49
2	92.62	1	1	10	0	5	42	1	62	1.5	27.56	1	0	0	90	110	60				2	1		186.76	136.67	1	50.6	108.83	1	1	1	1	1	1	5.52	1	1		2	1	53.2
2	94.59	1	1	10	0	5	39	1	51	1.55	21.23	2	1	1	69	120	70				2	1		194.25	110.65	1	40.6	97.6	1	1	1	1	1	1	4.32	1	1		2	1	95.8
2	87.56	1	1	10	3	4	50	1	85	1.68	30.12	0	0	0	98	110	70				2	1		207.12	284.69	0	56.2	123.98	1	1	0	0	0	1	3.9	0	0		2	1	92.71
2	97.98	1	1	10	0	5	32	1	68	1.62	26.56	1	0	0	87	120	80				2	1		152.2	133.2	1	55	98.2	1	1	1	1	1	1	5.1	1	1		1	0	103.6
2	97.98	1	1	10	0	5	34	1	88	1.74	30.06	0	0	0	101	130	70				2	1		156.1	139.74	1	56	92.15	1	1	1	1	1	1	5.2	1	1		2	1	83.4
2	97.98	1	1	10	0	5	35	1	68	1.6	26.56	1	0	0	87	110	80				2	1		164.2	149.2	1	63	109.32	1	1	1	1	1	1	5.1	1	1		1	0	103.6
2	97.98	1	1	10	0	5	34	1	91	1.74	30.06	0	0	0	101	130	70				2	1		156.1	139.74	1	46	92.15	1	1	1	1	1	1	3.2	1	1		2	1	83.4
2	97.98	1	1	10	0	5	29	1	60	1.62	22.86	2	1	1	69	120	80				2	1		177	123	1	48	94.4	1	1	1	1	1	1	4.23	0	0		2	1	89
2	93.27	1	1	10	0	5	41	1	58.5	1.67	20.98	1	1	1	70	120	80				2	1		159.33	136.84	1	52	91.38	1	1	1	1	1	1	4.1	1	0		2	1	86.93
2	85.13	1	1	10	3	4	54	1	76	1.75	24.82	2	1	0	87	125	80				2	1		170	76.88	1	48	83.23	1	1	1	1	1	1	5.4	1	1		2	1	99
2	86.34	1	1	10	3	4	52	1	63.5	1.7	21.97	2	1	1	69	120	80				2	1		189	193.31	1	63	107.34	1	1	0	1	0	1	4.5	1	1		2	1	89.2
2	90.69	1	1	10	0	5	45	1	88.5	1.81	27.01	1	0	0	91	125	70				2	1		227	177.3	0	44	107.47	1	1	0	0	0	1	5.82	0	0		2	1	80
2	76.62	1	1	20	3	4	69	0	80	1.62	30.48	0	0	0	99	130	90				2	1		265.36	174.43	0	72.9	157.57	0	1	0	0	0	0	7.1	1	1	7.7	0	0	140.97
2	77.16	1	1	10	3	4	68	0	64	1.6	25	1	1	0	81	120	80				2	1		235.65	192.31	0	61.1	136.09	0	1	0	0	0	1	4.4	1	1		2	1	97.39
2	79.92	1	1	20	3	4	63	0	87	1.62	33.15	0	0	0	96	120	80				2	1		249.7	194.26	0	34.8	107.22	1	0	0	0	0	0	7.9	1	1		2	1	91.61
2	76.62	1	1	10	3	4	69	0	77	1.53	32.89	0	0	0	99	140	95	1	0	0	0	0		248.34	129.13	1	45	144.2	0	1	1	0	0	0	6.6	1	1		1	0	111.37
2	70.43	1	1	10	3	4	81	0	54.8	1.62	20.88	2	1	1	68	120	80				2	1		196.69	156.11	1	49.55	105.97	1	1	0	1	0	1	4.33	1	1		2	1	90.6
2	85.64	1	1	10	3	4	51	1	76	1.6	29.69	1	0	0	90	140	90				2	1		176.28	129.9	1	44.2	106.1	1	1	1	1	1	1	4.2	1	1		2	1	81.86
2	91.22	1	1	20	0	5	42	1	65	1.63	24.46	2	1	1	76	110	85				2	1		122	98	1	45	57.4	1	1	1	1	1	1	3.5	0	1		2	1	70
2	83.26	1	1	20	3	4	55	1	66.5	1.58	26.64	1	0	0	82	130	70				2	1		119.32	91.07	1	67.8	78.32	1	1	1	1	1	1	5.32	1	1		2	1	69.54
2	89.95	1	1	10	3	4	44	1	64	1.5	28.44	1	0	0	88	120	70				2	1		227.29	87.46	1	62.7	147.1	0	1	1	0	0	0	6.5	1	1		1	0	111.25
2	87.46	1	1	10	3	4	48	1	82	1.72	27.72	1	0	0	93	119	77	0	0	1	0	0		192.82	194.14	1	42.8	111.19	1	1	0	1	0	1	4.66	1	1		2	1	97.07
2	94.48	1	1	10	0	5	37	1	74	1.54	31.2	0	0	0	99	110	70				2	1		181	178.3	1	38.44	106.9	1	0	0	1	0	0	7.1	1	1		2	1	79
2	89.95	1	1	20	3	4	44	1	68.5	1.58	27.44	1	0	0	88	110	80				2	1		229.84	155.7	0	56.1	142.6	0	1	0	0	0	0	7.1	1	1	7	0	0	135.84
2	96.5	1	1	10	0	5	34	1	63	1.68	22.32	2	1	1	75	110	70				2	1		98	53	1	52	85.3	1	1	1	1	1	1	4.1	1	1		2	1	73
2	82.1	1	1	10	3	4	57	1	82	1.52	35.49	0	0	0	108	130	80				2	1		233.3	225.24	0	42	146.25	0	1	0	0	0	1	4.6	1	1		2	1	73.67
2	102.79	1	1	10	0	5	25	1	71	1.56	29.17	1	0	0	92	110	70				2	1		166.2	144.55	1	45.6	91.81	1	1	1	1	1	0	6.88	1	1		1	0	108.58
2	80.96	1	1	10	3	4	59	1	66.5	1.58	26.64	1	0	0	83	120	80				2	1		226.91	218.57	0	56.1	127.1	1	1	0	0	0	1	5.6	1	1		1	0	105.94
2	102.08	1	1	20	0	5	26	1	67.5	1.65	24.79	2	1	1	76	120	70				2	1		157.77	118.63	1	48.1	85.94	1	1	1	1	1	1	4.1	1	1		2	1	75.29
2	96.5	1	1	10	0	5	34	1	69.5	1.62	26.48	1	0	0	86	130	70				2	1		192.1	85	1	43	102.3	1	1	1	1	1	1	3.7	1	1		2	1	86
2	97.18	1	1	10	0	5	33	1	82	1.62	31.25	0	0	0	99	90	60				2	1		186.2	104.03	1	57.3	108.09	1	1	1	1	1	1	4.3	1	1		2	1	90.4
2	89.32	1	1	10	3	4	45	1	61.5	1.56	25.27	1	0	0	81	100	70				2	1		172.94	135.4	1	69.6	105.56	1	1	1	1	1	1	4.5	1	1		2	1	94.33
2	98.55	1	1	10	0	5	31	1	62	1.5	27.56	1	0	0	83	120	70				2	1		173.9	144.21	1	57.3	103.62	1	1	1	1	1	1	5.1	1	1		2	1	95.04
2	101.36	1	1	10	0	5	27	1	60	1.64	22.31	2	1	1	73	130	70				2	1		185.35	87.19	1	44.9	78.9	1	1	1	1	1	1	3.4	1	1		2	1	87.02
2	99.25	1	1	10	0	5	30	1	63	1.66	22.86	2	1	1	72	120	70				2	1		132.96	94.44	1	56.6	77.47	1	1	1	1	1	1	4.5	1	1		2	1	89.35
2	97.18	1	1	10	0	5	33	1	59.8	1.62	22.79	2	1	1	69	120	80				2	1		214.61	204.28	0	45.2	128.55	1	1	0	0	0	1	4.4	1	1		2	1	98.85
2	91.87	1	1	10	0	5	41	1	55	1.58	22.03	2	1	1	72	100	80				2	1		145.96	78.29	1	48.3	92	1	1	1	1	1	1	4.98	1	1		2	1	90.16
2	82.68	1	1	10	3	4	56	1	77	1.55	32.05	0	0	0	96	126	79	0	0	1	0	0		163.77	57.09	1	31.2	121.15	1	0	1	1	0	0	6.7	1	1		1	0	118.13
2	90.59	1	1	10	0	5	43	1	61.5	1.68	21.79	2	1	1	70	130	80				2	1		281.26	212.24	0	57.2	181.61	0	1	0	0	0	1	3.1	1	1		2	1	81.95
2	81.53	1	1	10	3	4	58	1	60	1.64	22.31	2	1	1	72	120	80				2	1		152.2	148.2	1	59.5	53.63	1	1	1	1	1	1	5.6	1	1		1	0	101.71
2	101.36	1	1	10	0	5	27	1	60	1.62	22.86	2	1	1	70	130	70				2	1		101.93	70.25	1	41	86.55	1	1	1	1	1	1	3.77	1	1		2	1	71.01
2	97.18	1	1	10	0	5	33	1	59.5	1.53	25.42	1	0	0	82	110	80				2	1		140.88	139.96	1	42	70.89	1	1	1	1	1	1	4.33	1	1		2	1	88.3
2	80.39	1	1	10	3	4	60	0	71	1.51	31.14	0	0	0	93	110	80				2	1		264.73	241.16	0	39	137.22	0	0	0	0	0	0	6.9	1	1		2	1	92.63
2	93.82	1	1	10	0	5	38	1	70	1.58	28.04	1	0	0	87	120	80				2	1		193	86	1	36	139.8	0	0	1	1	0	0	6.6	1	1		2	1	88
2	99.25	1	1	10	0	5	30	1	72.5	1.6	28.32	1	0	0	87	120	80				2	1		181	118	1	47	104.4	1	1	1	1	1	0	6.1	1	1		2	1	65
2	95.15	1	1	10	0	5	36	1	62	1.48	28.31	1	0	0	88	125	80				2	1		189	138	1	43	112.4	1	1	1	1	1	0	6.32	1	1		2	1	80
2	97.18	1	1	10	0	5	33	1	67.5	1.71	23.08	2	1	1	72	110	85				2	1		101	54	1	47	43.2	1	1	1	1	1	1	4.32	1	1		2	1	68
2	91.87	1	1	10	0	5	41	1	62.5	1.63	23.52	2	1	1	70	110	70				2	1		122	98	1	48	54.4	1	1	1	1	1	1	4.32	0	0		2	1	75
2	99.25	1	1	10	0	5	30	1	64	1.64	23.8	2	1	1	70	100	60				2	1		188	128	1	54	84.2	1	1	1	1	1	1	4.1	1	1		2	1	80
2	91.87	1	1	10	0	5	41	1	69.5	1.54	29.31	1	0	0	88	130	70				2	1		164	197	1	42	82.6	1	1	0	1	0	0	6.1	1	1		2	1	82
2	98.55	1	1	10	0	5	31	1	61	1.72	20.62	2	1	1	72	120	80				2	1		119	60	1	45.4	61.6	1	1	1	1	1	1	4.1	1	1		2	1	85
2	98.55	1	1	10	0	5	31	1	73	1.62	27.82	1	0	0	85	130	70				2	1		193	86	1	54	121.8	1	1	1	1	1	1	5.6	1	0		2	1	80
2	91.87	1	1	10	0	5	41	1	75	1.66	27.22	1	0	0	87	110	90				2	1		243	108	1	41	110.2	1	1	1	0	0	1	5.8	1	1		2	1	75
2	94.48	1	1	10	0	5	37	1	68	1.6	26.56	1	0	0	87	120	70				2	1		185.3	110	1	42	109.3	1	1	1	1	1	1	4.33	1	1		2	1	81
2	93.17	1	1	10	0	5	39	1	64	1.58	25.64	1	0	0	86	130	70				2	1		173.2	143.1	1	49	103.22	1	1	1	1	1	1	3.77	1	1		2	1	78
2	97.86	1	1	10	0	5	32	1	52.5	1.6	20.51	2	1	1	69	120	70				2	1		158	77	1	46	96.6	1	1	1	1	1	0	6.77	1	1		2	1	74
2	97.18	1	1	10	0	5	33	1	58	1.63	21.83	2	1	1	69	120	80				2	1		189	75	1	43	78.33	1	1	1	1	1	0	6.1	1	1		2	1	71
2	93.82	1	1	10	0	5	38	1	72	1.6	28.12	1	0	0	91	120	80				2	1		182	93	1	53	102.2	1	1	1	1	1	1	5.7	1	1		2	1	79
2	99.25	1	1	10	0	5	30	1	57.5	1.62	21.91	2	1	1	69	110	60				2	1		164	56.45	1	55	97.71	1	1	1	1	1	1	3.82	1	1		2	1	94
2	96.5	1	1	10	0	5	34	1	46.5	1.53	19.86	2	1	1	69	110	70				2	1		185	145.67	1	51	74.87	1	1	1	1	1	1	3.1	1	1		1	0	100
2	97.86	1	1	10	0	5	32	1	59	1.56	24.24	2	1	1	72	120	80				2	1		178	134.3	1	52.3	98.84	1	1	1	1	1	1	4.5	1	0		2	1	81
2	88.7	1	1	20	3	4	46	1	67.5	1.63	25.41	1	0	0	85	110	70				2	1		160.84	125.8	1	64.7	70.98	1	1	1	1	1	0	7.33	1	1		2	1	86.48
2	83.26	1	1	20	3	4	55	1	69.2	1.53	29.56	1	0	0	98	118	82	0	0	1	0	0		160.08	144.3	1	40.3	90.92	1	1	1	1	1	0	6.7	1	1		2	1	96.28
2	88.08	1	1	10	3	4	57	1	68	1.56	27.94	1	0	0	88	123	83	0	0	1	0	0		198	155	1	52	115	1	1	0	1	0	1	5.3	1	1		2	1	82
2	98.55	1	1	10	0	5	31	1	52	1.69	18.21	2	1	1	68	130	70				2	1		110.63	77.99	1	40.3	98	1	1	1	1	1	0	6.2	1	1		2	1	78.3
2	87.46	1	1	10	3	4	48	1	49	1.56	20.13	2	1	1	70	120	80				2	1		170.85	107.93	1	47.6	77.3	1	1	1	1	1	1	4.4	1	1		2	1	89.2
2	98.55	1	1	28	0	5	31	1	60	1.6	23.44	2	1	1	72	110	70				2	1		249.22	82.62	1	44.4	99.77	1	1	1	0	0	1	4.33	1	1		2	1	72.61
2	85.04	1	1	10	3	4	52	1	55	1.64	20.45	2	1	1	68	130	80				2	1		146.2	101.43	1	56.8	98.32	1	1	1	1	1	1	4.2	1	1		2	1	93.66
2	88.08	1	1	10	3	4	47	1	56	1.6	21.87	2	1	1	75	130	80				2	1		146	50.33	1	48	87.93	1	1	1	1	1	1	3.1	1	1		2	1	89
2	81.53	1	1	10	3	4	58	1	62	1.58	24.84	2	1	1	71	120	70				2	1		184	133.32	1	59.1	65.5	1	1	1	1	1	1	4.2	1	1		2	1	90.86
2	84.44	1	1	20	3	4	53	1	70	1.64	26.03	1	0	0	88	170	80				2	1		223.48	270.73	0	49.5	119.83	1	1	0	0	0	0	6.6	1	1		1	0	106.37
2	88.08	1	1	10	3	4	47	1	82.5	1.7	28.55	1	0	0	92	120	80				2	1		208.04	207.54	0	57.6	108.93	1	1	0	0	0	1	5.33	1	1		1	0	105.84
2	100.65	1	1	10	0	5	28	1	76	1.54	32.05	0	0	0	97	110	80				2	1		305	214.76	0	36.6	146.2	0	0	0	0	0	0	6.6	1	0		2	1	83
2	99.95	1	1	10	0	5	29	1	52	1.58	20.83	2	1	1	66	110	60				2	1		189.2	59.24	1	57	94.4	1	1	1	1	1	1	3.7	1	0		2	1	61.03
2	97.86	1	1	20	0	5	32	1	84	1.7	29.07	1	0	0	94	120	80				2	1		179	140	1	41	110	1	1	1	1	1	1	5.23	1	1		2	1	78
2	83.85	1	1	20	3	4	54	1	83	1.6	32.42	0	0	0	93	140	95				1	0		213	127.22	1	43	144.56	0	1	1	0	0	1	5.76	1	1		1	0	100
2	99.95	1	1	10	0	5	29	1	82	1.73	27.4	1	0	0	92	120	80				2	1		172	103.81	1	41	110.24	1	1	1	1	1	1	5.3	1	0		2	1	75
2	85.64	1	1	10	3	4	51	1	88	1.71	30.09	0	0	0	99	128	83	0	0	1	0	0		240	245	0	34	170	0	0	0	0	0	1	4.8	1	1		1	0	116
2	100.65	1	1	10	0	5	28	1	82	1.73	27.4	1	0	0	92	110	80				2	1		172	103.81	1	41	110.24	1	1	1	1	1	1	5.3	1	0		2	1	75
2	85.64	1	1	10	3	4	51	1	88	1.71	30.09	0	0	0	99	111	81	0	0	1	0	0		240	245	0	37	170	0	0	0	0	0	1	4.2	1	1		1	0	116
2	93.82	1	1	10	0	5	38	1	82.5	1.6	32.23	0	0	0	101	120	90				2	1		117	70.06	1	46	56.99	1	1	1	1	1	0	7.3	1	1		1	0	110
2	93.17	1	1	10	0	5	39	1	80	1.7	27.68	1	0	0	95	120	80				2	1		256	189	0	39	123.2	1	0	0	0	0	1	5.62	0	0		2	1	63
2	91.87	1	1	10	0	5	41	1	72	1.68	25.51	1	0	1	73	125	80				2	1		186	58	1	42	92.3	1	1	1	1	1	1	5.4	1	1		2	1	78
2	87.46	1	1	10	3	4	48	1	93	1.83	27.77	1	0	0	92	130	80				2	1		280	296	0	36	134.8	0	0	0	0	0	1	5.8	0	0		2	1	71
2	86.24	1	1	10	3	4	50	1	80	1.7	27.68	1	0	0	96	120	80				2	1		281	331	0	31	143.8	0	0	0	0	0	1	5.3	1	1		2	1	87
2	94.48	1	1	10	0	5	37	1	80	1.67	28.69	1	0	0	99	120	90				2	1		221	91	1	48	154.8	0	1	1	0	0	0	6.2	1	0		2	1	83
2	91.22	1	1	10	0	5	42	1	65	1.68	23.03	2	1	1	74	120	80				2	1		187	100	1	35	82.22	1	0	1	1	0	1	4.6	1	1		2	1	92
2	83.85	1	1	10	3	4	54	1	65	1.61	25.08	1	0	1	80	120	80				2	1		249	388	0	45	136.4	0	1	0	0	0	1	4.1	1	1		2	1	79
2	97.18	1	1	10	0	5	33	1	60	1.59	23.73	2	1	1	68	110	70				2	1		152	123	1	48	99.4	1	1	1	1	1	1	4.32	1	1		2	1	84
2	95.15	1	1	10	0	5	36	1	85	1.72	28.73	1	0	0	90	120	80				2	1		254	173	0	56	103.7	1	1	0	0	0	0	6.6	1	1		2	1	84
2	92.51	1	1	10	0	5	40	1	73	1.65	26.81	1	0	0	91	130	80				2	1		233	102	1	53	109.6	1	1	1	0	0	1	5.7	0	0		2	1	86
2	83.85	1	1	10	3	4	54	1	70.5	1.65	25.9	1	0	0	82	120	80				2	1		137	103	1	52	84.4	1	1	1	1	1	1	5.2	1	1		2	1	82
2	95.82	1	1	10	0	5	35	1	62.5	1.72	21.13	2	1	1	70	120	85				2	1		103	53	1	55	66.2	1	1	1	1	1	1	3.44	1	1		2	0	100
2	82.1	1	1	10	3	4	57	1	78.5	1.69	27.49	1	0	0	91	140	90				1	0		236	310	0	37	107.2	1	0	0	0	0	0	7.1	1	0	6.6	0	0	136
2	80.96	1	1	20	3	4	59	1	65.5	1.56	26.91	1	0	0	86	130	84				2	1		192	199	1	51	121.2	1	1	0	1	0	0	6.9	0	0		1	0	109
2	95.15	1	1	10	0	5	36	1	72.5	1.7	25.09	1	0	0	81	110	75				2	1		198	214.28	1	52	70.22	1	1	0	1	0	1	5.1	0	0		2	1	94
2	95.82	1	1	10	0	5	35	1	62.5	1.78	19.73	2	1	1	67	110	70				2	1		182	226.17	1	49	87.77	1	1	0	1	0	1	3.1	0	0		2	1	95
2	88.7	1	1	10	3	4	46	1	67	1.67	24.02	2	1	1	70	110	70				2	1		172	83	1	64	91.4	1	1	1	1	1	1	5.7	1	1		1	0	104
2	95.82	1	1	10	0	5	35	1	72	1.81	21.98	2	1	1	72	110	80				2	1		109.33	111.1	1	58	75.32	1	1	1	1	1	1	3.6	0	0		2	1	86.3
2	89.32	1	1	10	3	4	45	1	98.5	1.8	30.4	0	0	0	106	120	80				2	1		258	239.04	0	37	133.19	0	0	0	0	0	0	7.2	0	0		1	0	112
2	99.25	1	1	10	0	5	30	1	80	1.69	28.01	1	0	0	99	120	70				2	1		182	217.27	1	38	100.55	1	0	0	1	0	0	6.8	1	0		1	0	107
2	98.55	1	1	20	0	5	31	1	74.5	1.68	26.4	1	0	0	87	120	80				2	1		199	147.1	1	48	111.58	1	1	1	1	1	1	5.9	1	0		2	1	96
2	98.55	1	1	10	0	5	31	1	88	1.75	28.73	1	0	0	93	110	80				2	1		201	155.11	0	35	134.98	0	0	0	0	0	0	6.2	1	0		2	1	98
2	92.51	1	1	10	0	5	40	1	70.5	1.6	27.54	1	0	0	88	120	90				2	1		210	205.05	0	46	122.99	1	1	0	0	0	1	5.6	1	0		2	1	92
2	93.82	1	1	21	0	5	38	1	72	1.71	24.62	2	1	1	68	110	80				2	1		192	140.9	1	42	81.82	1	1	1	1	1	1	4.23	1	0		2	1	77
2	97.86	1	1	10	0	5	32	1	60	1.68	21.26	2	1	1	70	120	70				2	1		193.3	144.3	1	52.3	91.2	1	1	1	1	1	1	4.2	1	0		2	1	86
2	89.95	1	1	20	3	4	44	1	78.1	1.65	28.69	1	0	0	91	120	80				2	1		230	216.35	0	37.2	139.73	0	0	0	0	0	0	6.1	1	1		2	1	98
2	93.82	1	1	10	0	5	38	1	78	1.71	26.67	1	0	0	88	120	70				2	1		182.2	110.28	1	56	93.34	1	1	1	1	1	0	6.3	1	1		1	0	102
2	99.25	1	1	10	0	5	30	1	76	1.77	24.26	2	1	0	90	120	80				2	1		181	122.77	1	44	66.8	1	1	1	1	1	1	4.2	1	1		2	1	92
2	90.59	1	1	10	0	5	43	1	70	1.68	24.8	2	1	0	90	120	80				2	1		222	173.52	0	42	135.2	0	1	0	0	0	1	5.6	0	0		1	0	100
2	93.17	1	1	20	0	5	39	1	85.5	1.69	29.94	1	0	0	100	130	80				2	1		197	238.58	1	38	111.28	1	0	0	1	0	1	5.2	0	0		2	1	92
2	89.95	1	1	10	3	4	44	1	76	1.66	27.58	1	0	0	88	120	80				2	1		247	213.3	0	45.5	108.84	1	1	0	0	0	1	5.8	1	0		2	1	92
2	82.68	1	1	10	3	4	56	1	94	1.79	29.34	1	0	0	98	110	70				2	1		285	218.45	0	43.3	138.01	0	1	0	0	0	0	7.1	0	0		1	0	102
2	86.24	1	1	10	3	4	50	1	89	1.74	29.4	1	0	0	93	120	80				2	1		268	188.9	0	39.4	130.82	0	0	0	0	0	0	6.6	0	0		2	1	89
2	100.65	1	1	10	0	5	28	1	80.5	1.77	25.7	1	0	0	82	125	70				2	1		187.2	162.3	1	49.3	105.24	1	1	0	1	0	1	5.1	1	1		2	1	92
2	100.65	1	1	10	0	5	28	1	69.5	1.69	24.33	2	1	1	78	120	80				2	1		173	141.2	1	55.3	87.46	1	1	0	1	1	1	5.2	1	1		2	1	91.2
2	89.95	1	1	10	3	4	44	1	78	1.63	29.36	1	0	0	90	120	80				2	1		183	144	1	54.9	99.3	1	1	1	1	1	0	6.7	1	0		2	1	91
2	90.59	1	1	10	0	5	43	1	75	1.62	28.58	1	0	0	97	125	85				2	1		239	189	0	39.9	101.55	1	0	0	0	0	0	6.8	1	0		1	0	109
2	99.25	1	1	10	0	5	30	1	85	1.75	27.76	1	0	0	92	120	80				2	1		198	177.3	1	44.2	118.34	1	1	0	1	0	1	5.6	1	0		1	0	123
2	98.55	1	1	10	0	5	31	1	70.5	1.71	24.11	2	1	1	76	120	80				2	1		207	189.9	0	49.9	129.12	1	1	0	0	0	0	6.2	1	0		1	0	112
2	102.79	1	1	10	0	5	25	1	79	1.84	23.33	2	1	1	76	100	50				2	1		179	133.9	1	49.8	92.42	1	1	1	1	1	0	6.8	1	0		1	0	120
2	93.82	1	1	10	0	5	38	1	86	1.72	29.07	1	0	0	98	125	80				2	1		191	167.28	1	34	123.54	1	0	0	1	0	0	6.7	0	1		2	1	84
2	95.82	1	1	10	0	5	35	1	66	1.64	24.54	2	1	1	70	120	70				2	1		201	250.59	0	43	107.88	1	1	0	0	0	0	6.6	0	0		1	0	108
2	99.95	1	1	10	0	5	29	1	71	1.79	22.16	2	1	1	76	110	70				2	1		192	99.04	1	42	91.23	1	1	1	1	1	1	3.7	1	1		2	1	85
2	99.25	1	1	10	0	5	30	1	95.5	1.79	29.81	1	0	0	97	125	80				2	1		195	232.95	1	33	125.43	1	0	0	1	0	0	6.5	0	0		1	0	100
2	100.65	1	1	20	0	5	28	1	86	1.79	26.84	1	0	0	85	115	70				2	1		180	142.45	1	56	113.51	1	1	1	1	1	1	5.6	0	1		2	1	94
2	88.7	1	1	10	3	4	46	1	87	1.73	29.07	1	0	0	99	120	80				2	1		179	197.17	1	49	110.57	1	1	0	1	0	1	5.8	1	1		2	1	86
2	102.08	1	1	10	0	5	26	1	90.5	1.71	30.95	0	0	0	101	125	70				2	1		181	223.92	1	37	99.22	1	0	0	1	0	0	6.8	0	1		2	1	96
2	100.65	1	1	10	0	5	28	1	74.5	1.69	26.08	1	0	0	86	125	80				2	1		189.3	149.21	1	42	89.32	1	1	1	1	1	1	5.1	1	1		2	1	88
2	97.86	1	1	10	0	5	32	1	77	1.73	25.73	1	0	1	78	120	80				2	1		237	230.22	0	55	105.96	1	1	0	0	0	1	5.1	1	0		2	1	97
2	97.86	1	1	10	0	5	32	1	73.5	1.71	25.14	1	0	0	82	120	80				2	1		158	67.05	1	49	105.59	1	1	1	1	1	1	5.3	1	0		2	1	98.2
2	87.46	1	1	10	3	5	48	1	60	1.63	22.58	2	1	1	72	120	50				2	1		166	144.84	1	44	93.03	1	1	1	1	1	1	5.7	0	1		2	1	89.2
2	96.5	1	1	10	0	5	34	1	74	1.81	22.59	2	1	1	76	115	60				2	1		175	144.58	1	49	97.08	1	1	1	1	1	1	3.7	1	1		2	1	97
2	99.95	1	1	10	0	5	29	1	58	1.65	21.3	2	1	1	73	120	70				2	1		182	182.55	1	58	87.49	1	1	0	1	0	1	4.1	0	0		2	1	87
2	91.22	1	1	10	0	5	42	1	83	1.71	28.38	1	0	0	93	125	80				2	1		187	134.62	1	52	108.23	1	1	1	1	1	1	5.9	1	0		2	1	91
2	101.36	1	1	10	0	5	27	1	65	1.67	23.31	2	1	1	76	120	70				2	1		162	123.1	1	57	80.38	1	1	1	1	1	1	4.2	1	1		2	1	91
2	100.65	1	1	10	0	5	28	1	76	1.68	26.93	1	0	0	88	110	70				2	1		161.4	123.93	1	54	102.21	1	1	1	1	1	1	5.2	1	0		2	1	86
2	102.79	1	1	10	0	5	25	1	69.5	1.66	25.22	1	0	0	82	120	80				2	1		162	296.87	1	45	87.23	1	1	0	1	1	1	5.5	0	1		1	0	101
2	97.18	1	1	10	0	5	33	1	82	1.75	26.78	1	0	0	88	130	80				2	1		165	119.79	1	42	99.04	1	1	1	1	1	1	5.62	0	0		2	1	90
2	93.17	1	1	10	0	5	39	1	61.5	1.7	21.28	2	1	1	75	110	60				2	1		104	236.42	1	41	88.33	1	1	0	1	1	1	3.22	0	0		2	1	95
2	99.95	1	1	10	0	5	29	1	82	1.75	26.78	1	0	0	88	120	80				2	1		83	138.51	1	46	89.2	1	1	1	1	1	1	5.6	0	0		2	1	98
2	98.55	1	1	10	0	5	31	1	63.5	1.6	24.8	2	1	1	74	130	80				2	1		184.3	123.33	1	49.3	70.33	1	1	1	1	1	1	4.2	0	1		2	1	94
2	94.48	1	1	10	0	5	37	1	58	1.5	25.78	1	0	0	85	125	80				2	1		166.3	70.41	1	44	97.92	1	1	1	1	1	1	5.6	1	0		2	1	95
2	94.48	1	1	10	0	5	37	1	60	1.71	20.52	2	1	1	69	100	70				2	1		186.33	103.7	1	48	66.23	1	1	1	1	1	1	3.1	1	0		2	1	83
2	89.32	1	1	10	3	4	45	1	81	1.83	24.19	2	1	1	72	130	70				2	1		192.3	142.3	1	42	89.3	1	1	1	1	1	1	4.2	1	0		2	1	83
2	99.25	1	1	10	0	5	30	1	60	1.68	21.26	2	1	1	68	120	80				2	1		141	57.62	1	41.6	90.48	1	1	1	1	1	1	3.2	1	1		2	1	87
2	95.82	1	1	10	0	5	35	1	82	1.73	27.4	1	0	0	88	120	80				2	1		205	232.78	0	36	122.44	1	0	0	0	0	1	5.8	1	0		2	1	82
2	89.95	1	1	10	3	4	44	1	85	1.62	32.39	0	0	0	101	145	90				1	0		191	59.41	1	39	140.12	0	0	1	1	0	0	7.23	1	0		2	1	68
2	80.96	1	1	10	3	4	59	1	83	1.61	32.02	0	0	0	100	130	70				2	1		222	71.28	1	38	139.04	0	0	1	0	0	1	6.92	1	1		2	1	80
2	87.46	1	1	10	3	4	48	1	73.5	1.78	23.2	2	1	1	72	120	80				2	1		185	134.6	1	52.3	79.32	1	1	1	1	1	1	5.1	1	1		2	1	82
2	91.22	1	1	10	0	5	42	1	92.8	1.75	30.3	0	0	0	99	120	80				2	1		163	140.2	1	51	102	1	1	1	1	1	1	6.6	1	0		2	1	86
2	96.5	1	1	10	0	5	34	1	79	1.61	30.48	0	0	0	99	120	85				2	1		210	232	0	43	120.6	1	1	0	0	0	1	4.2	1	0		2	1	85
2	97.18	1	1	10	0	5	33	1	73	1.76	23.57	2	1	1	80	120	70				2	1		160.72	73.91	1	41	104.94	1	1	1	1	1	1	3.7	1	0		2	1	72.23
2	99.25	1	1	10	0	5	30	1	65	1.7	22.49	1	1	1	78	120	80				2	1		132.1	117.16	1	67	98.32	1	1	1	1	1	1	5.2	1	1		2	1	67.99
2	71.84	1	1	23	3	4	76	0	52	1.55	21.64	2	1	1	73	110	70				2	1		166.88	143.67	1	56.5	78.2	1	1	1	1	1	1	4.4	1	1		2	1	91.23
2	75.46	1	1	10	3	4	69	0	57	1.5	25.33	1	0	0	81	130	80				2	1		215.2	190.3	0	52.4	125.75	1	1	0	0	0	1	4.6	1	1		2	1	90.2
2	76	1	1	10	3	4	68	0	50	1.6	19.53	2	1	1	66	120	70				2	1		183.83	145.1	1	48	97.2	1	1	1	1	1	1	4.2	1	1		2	1	72.86
2	79.27	1	1	10	3	4	62	0	64.5	1.52	27.92	1	0	0	89	100	80				2	1		230.53	171.98	0	51.2	144.93	0	1	0	0	0	1	5.1	1	1		2	1	90.02
2	70.34	1	1	10	3	4	79	0	67	1.6	26.17	1	0	0	86	150	100				1	0		215.06	118.5	1	51	98.3	1	1	1	0	0	1	5.3	1	1		2	1	69.88
2	77.61	1	1	10	3	4	65	0	66	1.62	25.15	1	0	0	82	123	81	0	0	1	0	0		198.79	86.16	1	62	119.56	1	1	1	1	1	1	5.5	1	1		2	1	90.86
2	79.27	1	1	10	3	4	62	0	63	1.65	23.14	2	1	1	74	110	60				2	1		132.09	97.82	1	53.4	89.13	1	1	1	1	1	1	4.3	0	0		2	1	84.17
2	75.46	1	1	20	3	4	69	0	57	1.5	25.33	1	0	0	85	120	80				2	1		210.2	190.1	0	50.1	115.2	1	1	0	0	0	1	4.6	1	1		2	1	89.2
2	78.16	1	1	20	3	4	64	0	57	1.5	25.33	1	0	0	85	120	80				2	1		216.81	193.28	0	52.4	125.75	1	1	0	0	0	1	4.6	1	1		2	1	93.62
2	93.73	1	1	10	0	5	36	1	55	1.57	22.31	2	1	1	70	85	60				2	1		198.59	116.48	1	57	98.29	1	1	1	1	1	1	3.9	1	1		2	1	54.49
2	83.18	1	1	10	3	4	53	1	72.5	1.53	30.97	0	0	0	96	130	70				2	1		284.95	182.59	0	59	189.43	0	1	0	0	0	0	7.2	1	1		2	1	87.75
2	82.6	1	1	20	3	4	54	1	60	1.52	25.97	1	0	0	81	110	70				2	1		191.25	63.47	1	54	78.32	1	1	1	1	1	1	5.43	1	1		2	1	69.43
2	86.76	1	1	20	3	4	47	1	65	1.67	23.31	2	1	1	73	110	70				2	1		196.73	48.29	1	46.8	78.32	1	1	1	1	1	1	4.5	0	1		2	1	87.81
2	78.09	1	1	10	3	4	62	0	75	1.65	28.23	1	0	0	88	121	79	0	0	1	0	0		193.48	197.43	1	35	118.99	1	0	0	1	0	1	4.2	0	0		2	1	76.03
2	82.6	1	1	20	3	4	54	1	71.5	1.62	27.24	1	0	0	88	140	90				1	0		190.89	347.46	1	48.9	122.5	1	1	0	1	0	1	4.4	1	1		2	1	74.9
2	78.64	1	1	10	3	4	61	0	65	1.61	25.08	1	0	0	81	120	80				2	1		272.25	295.29	0	66.9	146.29	0	1	0	0	0	1	4.3	1	1		2	1	99.96
2	100.55	1	1	10	0	5	26	1	54.5	1.57	22.11	2	1	1	70	110	80				2	1		112.33	75.07	1	56	79.1	1	1	1	1	1	1	3.1	1	1		2	1	96.23
2	89.23	1	1	10	3	4	43	1	56	1.61	21.6	2	1	1	72	110	70				2	1		188.01	78.92	1	45.9	126.33	1	1	1	1	1	1	5.2	0	1		2	1	77.77
2	91.14	1	1	10	0	5	40	1	62.5	1.52	27.05	1	0	0	90	100	70				2	1		220.71	72.73	1	47.8	158.36	0	1	1	0	0	1	5.3	1	1		1	0	100.16
2	82.02	1	1	20	3	4	55	1	78	1.51	34.21	0	0	0	98	130	80				2	1		160.38	173.68	1	46.5	109.15	1	1	0	1	0	0	7.3	1	1		1	0	117.01
2	82.02	1	1	10	3	4	55	1	64	1.5	28.44	1	0	0	90	123	81	0	0	1	0	0		218.07	176.32	0	38.5	144.31	0	0	0	0	0	0	6.7	1	1		2	1	93.35
2	93.08	1	1	10	0	5	37	1	66	1.65	24.24	2	1	1	70	130	70				2	1		214.03	284.53	0	56.5	123.63	1	1	0	0	0	0	6.9	1	1		1	0	104.03
2	93.73	1	1	10	0	5	36	1	59	1.63	22.21	2	1	1	71	110	70				2	1		181.57	132.21	1	49.8	95.33	1	1	1	1	1	1	4.4	1	1		2	1	87.26
2	100.55	1	1	10	0	5	26	1	49.9	1.59	19.74	2	1	1	68	130	70				2	1		167.09	97.48	1	51.3	78.2	1	1	1	1	1	1	3.1	1	1		2	1	87.48
2	92.42	1	1	20	0	5	38	1	69	1.6	26.95	1	0	0	86	125	80				2	1		276.53	130.82	1	77.3	133.02	0	1	1	0	0	1	4.7	1	1		2	1	82.13
2	97.77	1	1	10	0	5	30	1	70	1.72	23.66	2	1	1	74	110	70				2	1		172.75	72.63	1	72	86.22	1	1	1	1	1	1	3.1	0	1		2	1	71.15
2	95.73	1	1	10	0	5	33	1	59	1.63	22.21	2	1	1	69	110	70				2	1		183.76	131.35	1	42	85.7	1	1	1	1	1	1	4.2	1	1		2	1	64.75
2	95.73	1	1	10	0	5	33	1	55	1.58	22.03	2	1	1	70	120	60				2	1		165.45	66.18	1	49	93.1	1	1	1	1	1	1	5.6	1	1		2	1	89.28
2	95.06	1	1	10	0	5	34	1	60	1.59	23.73	2	1	1	70	90	70				2	1		182.33	142.3	1	56	104.88	1	1	1	1	1	1	4.23	1	1		2	1	60.96
2	93.73	1	1	10	0	5	36	1	67.5	1.73	22.55	2	1	1	75	120	70				2	1		194.3	99.52	1	65	109.1	1	1	1	1	1	0	6.9	1	1		2	1	86
2	89.23	1	1	10	3	4	43	1	68	1.6	26.56	1	0	0	86	130	70				2	1		197.87	119.44	1	55.8	118.18	1	1	1	1	1	0	6.6	1	1		1	0	101.42
2	93.73	1	1	10	0	5	36	1	55	1.57	22.31	2	1	1	70	110	60				2	1		198.59	116.48	1	57	138.29	0	1	1	1	0	1	3.9	1	1		2	1	54.49
2	82.6	1	1	20	3	4	54	1	60	1.52	25.97	1	0	0	86	110	70				2	1		191.25	63.47	1	54	78.32	1	1	1	1	1	1	5.43	1	1		2	1	69.43
2	86.76	1	1	20	3	4	47	1	65	1.67	23.31	2	1	1	72	110	70				2	1		196.73	48.29	1	46.8	78.32	1	1	1	1	1	1	4.5	0	1		2	1	87.81
2	98.46	1	1	10	0	5	29	1	54	1.66	19.6	2	1	1	66	130	60				2	1		149.64	96.97	1	58	72.25	1	1	1	1	1	1	4.2	0	0		2	1	77.44
2	78.64	1	1	10	3	4	61	0	70	1.63	26.35	1	0	0	88	116	71	0	0	1	0	0		192.4	196.4	1	56.2	117.7	1	1	0	1	0	1	4.2	0	0		2	1	76.03
2	98.46	1	1	10	0	5	29	1	54	1.66	19.6	2	1	1	66	120	60				2	1		149.64	96.97	1	58	72.25	1	1	1	1	1	1	4.2	0	0		2	1	77.44
2	78.64	1	1	10	3	4	61	0	70	1.63	26.35	1	0	0	88	120	80				2	1		193.48	197.43	1	45.2	118.99	1	1	0	1	0	1	4.2	0	0		2	1	76.03
2	97.77	1	1	10	0	5	30	1	64.5	1.6	25.2	1	0	0	82	120	80				2	1		182	121	1	49	106.8	1	1	1	1	1	1	4.33	1	1		2	1	91
2	80.31	1	1	10	3	4	58	1	71	1.61	27.39	1	0	0	88	140	80				2	1		216.26	175.14	0	40	141.23	0	1	0	0	0	1	5.8	1	0		2	1	88.78
2	84.36	1	1	10	3	4	51	1	94.5	1.71	32.32	0	0	0	104	122	78	0	0	1	0	0		134	240.15	1	29	146.97	0	0	0	1	0	0	7.3	1	0		1	0	108
2	73.82	1	1	10	3	4	70	0	80	1.6	31.25	0	0	0	96	118	83	0	0	1	0	0		117.5	55.47	1	29.8	76.61	1	0	1	1	0	0	7.1	1	1		2	1	80.44
2	77.54	1	1	20	3	4	63	0	72	1.56	29.59	1	0	0	92	110	70				2	1		255.42	296.89	0	51.6	104.44	1	1	0	0	0	0	6.6	1	1		2	1	99.91
2	69.78	1	1	20	3	4	78	0	59.8	1.61	23.07	1	1	1	70	120	80				2	1		171.22	148.11	1	41.9	98.3	1	1	1	1	1	1	4.2	1	1		2	1	85.6
2	73.82	1	1	10	3	4	70	0	53.5	1.58	21.43	2	1	1	70	120	70				2	1		197.46	110.53	1	45	89.8	1	1	1	1	1	1	4.2	1	1		2	1	59.93
2	76.46	1	1	20	3	4	65	0	66	1.6	25.78	1	0	0	83	140	90				1	0		179.82	145.73	1	66.2	84.47	1	1	1	1	1	0	6.8	1	1		1	0	100.43
2	76.46	1	1	10	3	4	65	0	70	1.5	31.11	0	0	0	96	123	81	0	0	1	0	0		117.5	55.47	1	29.8	76.61	1	0	1	1	0	1	5.3	1	1		2	1	80.44
2	84.89	1	1	10	3	4	48	1	59	1.52	25.54	1	0	0	81	120	85				2	1		299.98	73.02	1	53	162.38	0	1	1	0	0	1	4.2	0	0		2	1	91.27
2	77.48	1	1	20	3	4	61	0	65	1.69	22.76	2	1	0	88	120	60				2	1		160	133.3	1	44.3	89.04	1	1	1	1	1	1	4.4	1	1		2	1	83
2	93.66	1	1	10	0	5	34	1	52	1.55	21.64	2	1	1	67	100	60				2	1		144.8	76.8	1	53.2	82.44	1	1	1	1	1	1	4.2	1	1		2	1	82.33
2	78.02	1	1	10	3	4	45	1	82	1.58	32.85	0	0	0	103	124	82	0	0	1	0	0		217.3	159.57	1	41.5	142.3	0	1	0	0	0	1	4.23	1	1		2	1	73.67
2	81.96	1	1	20	3	4	53	1	52	1.56	21.37	2	1	1	68	120	80				2	1		148.48	116.39	1	50.5	74.7	1	1	1	1	1	1	5.19	1	1		2	1	92.94
2	80.81	1	1	10	3	4	55	1	62	1.56	25.48	1	0	0	86	120	90				2	1		192.72	148.2	1	77.1	101.94	1	1	1	1	1	1	5.2	1	1		2	1	89.54
2	84.29	1	1	10	3	4	49	1	63	1.54	26.56	1	0	0	87	115	76	0	0	1	0	0		178.73	107.32	1	46.3	90.97	1	1	1	1	1	0	6.6	1	1		1	0	109.94
2	97.01	1	1	10	0	5	29	1	50	1.56	20.55	2	1	1	67	110	70				2	1		136.83	74.09	1	45.3	91.71	1	1	1	1	1	1	4.2	1	1		2	1	96.06
2	82.53	1	1	10	3	4	52	1	70	1.5	31.11	0	0	0	92	126	83	0	0	1	0	0		213.2	164.86	0	57.9	77.6	1	1	0	0	0	1	5.2	1	1		1	0	117.92
2	86.09	1	1	10	3	4	46	1	80	1.62	30.48	0	0	0	100	100	70				2	1		188.47	122.55	1	49.6	114.36	1	1	1	1	1	0	6.88	1	0		1	0	115.61
2	94.98	1	1	10	0	5	32	1	66	1.64	24.54	2	1	1	72	100	70				2	1		165.97	107.13	1	40.9	103.64	1	1	1	1	1	1	3.4	0	1		2	1	84.92
2	95.65	1	1	10	0	5	31	1	45.5	1.5	20.22	2	1	1	69	130	70				2	1		178.8	67.52	1	46.7	98.51	1	1	1	1	1	1	5.5	1	1		1	0	105.67
2	91.71	1	1	10	0	5	37	1	88	1.62	33.53	0	0	0	95	100	60				2	1		231.62	213.27	1	51.6	137.37	0	1	0	0	0	0	6.6	1	1		2	1	95.43
2	99.77	1	1	10	0	5	25	1	50	1.58	20.03	2	1	1	69	120	60				2	1		163.82	105.99	1	45.5	80.2	1	1	1	1	1	1	4.45	1	1		2	1	68.61
2	89.79	1	1	10	3	4	40	1	64.5	1.5	28.67	1	0	0	87	100	70				2	1		190.36	170.82	1	98.1	108.1	1	1	0	1	0	1	5.88	0	1		2	1	78.22
2	96.33	1	1	10	0	5	30	1	56	1.58	22.43	2	1	1	71	130	70				2	1		184.55	111.2	1	56	66.8	1	1	1	1	1	1	3.88	1	1		2	1	58.97
2	82.53	1	1	10	3	4	52	1	80	1.53	34.17	0	0	0	105	120	80				2	1		205.52	134.62	1	36	142.6	0	0	1	0	0	0	6.8	1	1		2	1	81.93
2	79.69	1	1	10	3	4	57	1	78	1.6	30.47	0	0	0	97	130	85				2	1		167.53	128.33	1	39	102.86	1	0	1	1	0	0	6.6	1	0		2	1	80.91
2	91.06	1	1	10	0	5	38	1	70	1.6	27.34	1	0	0	88	110	60				2	1		162.73	112.33	1	68	116.3	1	1	1	1	1	1	4.6	1	1		2	1	61.17
2	86.69	1	1	10	3	4	45	1	59	1.6	23.05	2	1	1	73	120	80				2	1		204.42	115.13	1	57	84.32	1	1	1	0	0	1	4.6	1	1		2	1	77.33
2	87.92	1	1	10	3	4	43	1	62.5	1.57	25.36	1	0	0	85	125	80				2	1		191.37	124.31	1	48	118.51	1	1	1	1	1	1	5.23	1	1		2	1	73.87
2	78.02	1	1	10	3	4	60	0	82	1.6	32.03	0	0	0	96	150	90	1	0	0	0	0		213.4	184.5	0	34.2	114.13	1	0	0	0	0	1	5.6	1	1		1	0	111
2	77.48	1	1	10	3	4	61	0	58	1.52	25.1	1	0	0	87	120	80				2	1		157.09	160.24	1	52	93.04	1	1	0	1	0	0	6.6	1	1		1	0	100.49
2	87.31	1	1	20	3	4	44	1	78.5	1.69	27.49	1	0	0	87	125	80				2	1		212.71	198.38	0	52	121.03	1	1	0	0	0	1	5.7	1	1		2	1	94.74
2	89.16	1	1	10	3	4	41	1	59.3	1.62	22.6	2	1	1	76	120	80				2	1		193.2	76.53	1	69.3	69.78	1	1	1	1	1	1	3.1	1	0		2	1	99.05
2	82.53	1	1	10	3	4	52	1	62.5	1.53	26.7	1	0	0	86	120	80				2	1		183.66	148.56	1	45.4	108.55	1	1	1	1	1	1	5.7	0	1		2	1	83.11
2	77.48	1	1	20	3	4	61	0	81.5	1.63	30.67	0	0	0	96	130	80				2	1		187.6	178.3	1	39.2	109.94	1	0	0	1	0	0	6.6	1	1		2	1	88.9
2	87.31	1	1	10	3	4	44	1	50	1.56	20.55	2	1	1	67	110	70				2	1		188.2	145.2	1	63.4	105.3	1	1	1	1	1	1	5.1	1	1	6.6	0	0	136.17
2	91.06	1	1	10	0	5	38	1	52	1.54	21.93	2	1	1	66	120	80				2	1		220.48	233.3	0	65.5	108.32	1	1	0	0	0	1	4.42	1	1		2	1	90
2	99.77	1	1	10	0	5	25	1	45	1.54	18.97	2	1	1	66	110	70				2	1		141.19	106.88	1	49.8	70.01	1	1	1	1	1	1	3.22	1	1		2	1	94.87
2	85.48	1	1	10	3	4	47	1	57	1.56	23.42	2	1	1	70	110	70				2	1		178.08	136.97	1	41.3	109.39	1	1	1	1	1	0	6.6	0	0		1	0	110.48
2	89.16	1	1	10	3	4	41	1	51.5	1.6	20.12	2	1	1	70	120	60				2	1		139.72	146.44	1	46.6	66.7	1	1	1	1	1	1	3.2	1	1		2	1	92.99
2	81.38	1	1	10	3	4	54	1	61	1.58	24.44	2	1	1	73	110	70				2	1		196.65	119.62	1	43	129.73	1	1	1	1	1	1	4.2	1	1		2	1	72.64
2	89.16	1	1	10	3	4	41	1	60	1.59	23.73	2	1	1	73	130	80				2	1		174.5	148.84	1	51.8	86.91	1	1	1	1	1	1	4.1	1	1		2	1	92.71
2	92.35	1	1	10	0	5	36	1	43.5	1.5	19.33	2	1	1	66	130	70				2	1		118.2	116.58	1	62	92.3	1	1	1	1	1	1	3.1	1	1		2	1	85.44
2	84.29	1	1	20	3	4	49	1	73	1.55	30.39	0	0	0	97	130	80				2	1		197.49	145.92	1	43	125.31	1	1	1	1	1	0	6.6	1	1		2	1	76.12
2	81.96	1	1	20	3	4	53	1	52	1.56	21.37	2	1	1	72	110	90				2	1		148.48	116.39	1	50.5	74.7	1	1	1	1	1	1	5.19	1	1		2	1	92.94
2	89.79	1	1	10	3	4	40	1	59.5	1.61	22.95	2	1	1	78	120	70				2	1		153.79	134.67	1	48.7	78.16	1	1	1	1	1	1	4.1	1	0		2	1	84.97
2	88.54	1	1	10	3	4	42	1	70.5	1.7	24.39	2	1	1	70	120	80				2	1		176.1	116.71	1	56	91.78	1	1	1	1	1	1	5.3	1	0		2	1	95.19
2	88.54	1	1	10	3	4	42	1	51.5	1.59	20.37	2	1	1	72	100	80				2	1		168.21	79.53	1	49.3	66.34	1	1	1	1	1	1	3.3	1	1		2	1	81.98
2	90.43	1	1	10	0	5	39	1	85	1.65	31.22	0	0	0	98	110	80				2	1		234.69	230.95	0	36.9	121.6	1	0	0	0	0	1	5.5	1	0		2	1	92.69
2	87.31	1	1	10	3	4	44	1	76	1.7	26.3	1	0	0	89	125	80				2	1		129	71	1	49	75.8	1	1	1	1	1	1	5.23	1	1		2	1	87
2	95.65	1	1	10	0	5	31	1	90.5	1.8	27.93	1	0	0	88	120	80				2	1		164	189	1	45	81.2	1	1	0	1	0	0	6.1	1	0		2	1	92
[truncated: 1,902 more rows]

## Sheet: DEFINITION AND CATEGORITATION 
VARIABLE	DEFINICION
SEX	1=Man, 2=Woman
GFR BY CKD-EPI	GLOMERULAR FILTRATION RATE ESTIMATED BY CKD-EPI
CKD	CHRONIC KIDNEY DISEASE: 0=Yes 1= No
ACR RATIO	ALBUMINE/CREATININE CATEGORY 0= =>30 µg/g; 1=<30 µg/g
ACR	ALBUMINE/CREATININE RATIO (ACR) µg/g
RISK CATEGORY BY GFR AND ARC	RISK CATEGORY: 0= GFR=>90-A1; 1= GFR=>90-A2; 2=GFR=>90-A3; 3= GFR 60-89,A1; 4= GFR 60-89,A2; 5= GFR 60-89,A3; 6= GFR 45-59,A1; 7= GFR 45-59,A2; 8= GFR 45-59,A3; 9= GFR 30-44,A1; 10= GFR 30-44.A2; 11= GFR 30-44, A3; 12= GFR 15-29,A1; 13= GFR 15-29,A2; 14= GFR 15.29,A3; 15= GFR <15,A1; 16= GFR<15A2; 17:= GFR<15, A3
CKD CATEGORY	CKD CATEGORY: 0=STAGE V GFR<15; 1=STAGE IV GFR 15-29.9; 2= STAGE IIIa GFR 30-44.9; 3= STAGE IIIb GFR 45-59.9; 4= STAGE II GFR 60-89.9; 5= STAGE I GFR =>90
AGE	Age (years)
AGE CAEGORY	Age Category: 0 ≥60 Years; 1 <60 Years
WEIGHT	Weight (Kg)
HEIGHT	Height (Meters)
MBI	BMI (Weight Kg/Height meters squared)
BMI CLASIFICATION	BMI classification: 0 BMI =>30; 1= BMI 25-29.9; 2= BMI <25
BMI CATEGORY	BMI Category: 0=>25; 1<25
AC CATEGORY	Abdominal Circunference (cm): 0 >80 Woman, and >90 Man; 1 =<80 Woman, and =<90 Man
AC	Abdominal Circunference (cm)
SBP	Systolic blood pressure (mm/Hh)
DBP	Diastolic blood pressure mm/Hg)
H WITH TREAT AND CONTROLLED	0=yes; 1= no
WITH TREATMENT	PHARMACOLOGICAL AND NON-PHARMACOLOGICAL TREATMENT. 0=YES; 1=NO
CONTROL HYPERTENS	0=yes; 1=no
KNOW HYPERTENSE	KNOW HYPERTENSE: 0= SI; 1= NO
HYPERTENSION	Hypertension : 0= Yes; 1= No
SERUM CREATININE	SERUM CREATININE mg/dL
TC	Total Cholesterol (TC) (mg/dL)
TC CATEGORY	Total cholesterol (TC) Category. 0 => 200 mg/dL; 1 < 200 mg/dL
TG	Triglycerides (TG) (mg/dL)
TG CATEGORY	Triglycerides (TG) Category. 0 => 150 mg/dL. 1 <150 mg/dL
TC AND TG ELEVATED	TOTAL CHOLESEROL AND TRIGLYCERIDES ELEVTED. 0=SI; 1=NO
HDL-c	HDL-cholesterol (mg/dL)
HDL-c CATEGORY	HDL-c Category. 0= HDL-c <40 ; 1= HDL-c =>40 mg/dL
LDL-c	LDL-Cholesterol (mg/dL)
CAT_LDL	Category LDL-C. 0= LDL-C =>130 mg/dL. 1 LDL-C <130 mg/dL
LDL-c CATEGORY	LDL-c Category. 0 =>130 mg/dL. 1<130 mg/dL
DYSLIPIDEMIA	DYSLIPIDEMIA: 0=YES; 1= NO
AU CATEGORY	Uric Acid (HYPERURICEMIA) Category: 0 =>6 mg/dL in woman, or => 7 mg/dL in Man; 1 <6 mg/dL in woman, or <7 mg/dL in man
UA	Uric Acid (mg/dL)
TABAQUISM	0= YES; 1= NO
ALCOHOLISM	0= YES; 1= NO
HbA1c	GLYCOSYLATED HEMOGLOBIN %
GLUC CLASIF	Seric Glucose clasification: 0 =>126 mg/dL; 1 100-125 mg/dL; 2 < 100 mg/dL
GLUC CAEGORY	Seric glucose clasification: 0 =>100 MG/DL; 1 < 100 MG/DL
SERUM GLUCOSE	Serum glucose (mg/dL)
