# Supplementary material for: Prevalence and metabolic risk factors of chronic kidney disease among a Mexican adult population: a cross-sectional study in primary healthcare medical units
Source: PeerJ. 2024 Jul 30;12:e17817. doi: 10.7717/peerj.17817 (PMC11296299; doi:10.7717/peerj.17817)
Supplement: Supplemental Information 2 [file peerj-12-17817-s002.xlsx]

## Sheet: S1_correlation_matrix
Correlations
			GFR by CKD-EPI	Age	Body mass index kg/m2	Abdominal Circumference m	SBP (MM/HG)	DBP (MM/HG)	Total Cholesterol mg/dL	Triglycerides mg/dL	HDL cholesterol mg/dL	LDL cholesterol mg/dL	Uric Acid mg/dL	Serum glucose mg/dL
Spearman's rho	GFR by CKD-EPI	Correlation Coefficient	--
	Age	Correlation Coefficient	-0.799835	--
	Body mass index kg/m2	Correlation Coefficient	-0.496731	0.513124	--
	Abdominal Circumference m	Correlation Coefficient	-0.375254	0.427603	0.898438	--
	SBP (MM/HG)	Correlation Coefficient	-0.355138	0.374553	0.462688	0.433684	--
	DBP (MM/HG)	Correlation Coefficient	-0.419186	0.463586	0.530487	0.514581	0.590854	--
	Total Cholesterol mg/dL	Correlation Coefficient	-0.429576	0.373897	0.494541	0.473148	0.303668	0.368007	--
	Triglycerides mg/dL	Correlation Coefficient	-0.330123	0.322975	0.481031	0.495998	0.267422	0.357803	0.522047	--
	HDL cholesterol mg/dL	Correlation Coefficient	0.0806246	-0.0834578	-0.314679	-0.311685	-0.199817	-0.218979	-0.0734915	-0.208376	--
	LDL cholesterol mg/dL	Correlation Coefficient	-0.4173	0.37753	0.606937	0.58165	0.335974	0.376437	0.678918	0.470394	-0.200738	--
	Uric Acid mg/dL	Correlation Coefficient	-0.431343	0.449996	0.684591	0.66229	0.393433	0.447901	0.427032	0.411154	-0.205781	0.474994	--
	Serum glucose mg/dL	Correlation Coefficient	-0.448439	0.425707	0.421417	0.379509	0.306701	0.371268	0.360618	0.366681	-0.0507131	0.351035	0.546132	--
			GFR by CKD-EPI	Age	Body mass index kg/m2	Abdominal Circumference m	SBP (MM/HG)	DBP (MM/HG)	Total Cholesterol mg/dL	Triglycerides mg/dL	HDL cholesterol mg/dL	LDL cholesterol mg/dL	Uric Acid mg/dL	Serum glucose mg/dL
Kendall's tau_b	GFR by CKD-EPI	Correlation Coefficient	--
	Age	Correlation Coefficient	-0.608269	--
	Body mass index kg/m2	Correlation Coefficient	-0.337544	0.35816	--
	Abdominal Circumference m	Correlation Coefficient	-0.252343	0.298376	0.731889	--
	SBP (MM/HG)	Correlation Coefficient	-0.256208	0.272734	0.339824	0.322526	--
	DBP (MM/HG)	Correlation Coefficient	-0.308226	0.346556	0.398777	0.390682	0.493508	--
	Total Cholesterol mg/dL	Correlation Coefficient	-0.292767	0.254453	0.336988	0.325666	0.220057	0.271224	--
	Triglycerides mg/dL	Correlation Coefficient	-0.220972	0.219002	0.327569	0.341591	0.192539	0.264574	0.362563	--
	HDL cholesterol mg/dL	Correlation Coefficient	0.054045	-0.0570516	-0.211041	-0.210665	-0.142691	-0.159176	-0.0504215	-0.139577	--
	LDL cholesterol mg/dL	Correlation Coefficient	-0.283345	0.258329	0.427434	0.41057	0.244094	0.276961	0.492516	0.320151	-0.137824	--
	Uric Acid mg/dL	Correlation Coefficient	-0.29572	0.31477	0.516269	0.494202	0.288563	0.3357	0.292752	0.282792	-0.138593	0.329437	--
	Serum glucose mg/dL	Correlation Coefficient	-0.306525	0.290944	0.287203	0.260618	0.22078	0.275015	0.244416	0.24973	-0.0326234	0.23625	0.381532	--
			GFR by CKD-EPI	Age	Body mass index kg/m2	Abdominal Circumference m	SBP (MM/HG)	DBP (MM/HG)	Total Cholesterol mg/dL	Triglycerides mg/dL	HDL cholesterol mg/dL	LDL cholesterol mg/dL	Uric Acid mg/dL	Serum glucose mg/dL
Pearson	GFR by CKD-EPI	Pearson Correlation	--
	Age	Pearson Correlation	-0.777938	--
	Body mass index kg/m2	Pearson Correlation	-0.484202	0.499851	--
	Abdominal Circumference m	Pearson Correlation	-0.350046	0.406277	0.881378	--
	SBP (MM/HG)	Pearson Correlation	-0.386614	0.383337	0.472469	0.432436	--
	DBP (MM/HG)	Pearson Correlation	-0.40246	0.441817	0.506514	0.485974	0.604868	--
	Total Cholesterol mg/dL	Pearson Correlation	-0.430009	0.351357	0.461488	0.442604	0.307891	0.342459	--
	Triglycerides mg/dL	Pearson Correlation	-0.298995	0.284607	0.437581	0.451056	0.263688	0.318124	0.491078	--
	HDL cholesterol mg/dL	Pearson Correlation	0.046148	-0.043182	-0.267063	-0.256076	-0.179364	-0.165255	0.00279049	-0.160919	--
	LDL cholesterol mg/dL	Pearson Correlation	-0.420858	0.364568	0.568845	0.539072	0.332395	0.346762	0.683764	0.418889	-0.12653	--
	Uric Acid mg/dL	Pearson Correlation	-0.425867	0.437811	0.676154	0.655337	0.391599	0.416299	0.396646	0.376926	-0.165108	0.446701	--
	Serum glucose mg/dL	Pearson Correlation	-0.450188	0.378731	0.379828	0.344888	0.324512	0.327624	0.348682	0.33337	-0.0410342	0.353233	0.476397	--

## Sheet: S3_colinearity
Input and deleted variables
Model	Input Variables	Deleted Variables	Method
1	Serum glucose mg/dL, HDL cholesterol mg/dl, creaser1, TAD (MM/HG), Triglycerides, AGE, LDL-c, BMI=body mass index, Total cholesterol mg/dl, TAS (MM/HG), glycated Hg % b		Input
a. Dependent variable: GFR ESTIMATED BY CKD-EPI
b. All requested variables entered.
Model Summary
Modelo	R	R squared	R squared adjusted	Standard error of the estimate
1	.815a	0.663579	0.654139	12.7559
a. Predictors: (Constant), Serum glucose mg/dL, HDL cholesterol mg/dl, creaser1, TAD (MM/HG), Triglycerides, AGE, LDL-c, BMI=body mass index, Total cholesterol mg/dl, SBP (MM/ HG), glycosylated Hg %
ANOVA
Modelo		Sum of squares	gl	Cuadratic Mean	F	Sig.
1	Regression	125811	11	11437.4	70.2916	.000b
	Residual	63783.6	392	162.713
	Total	189595	403
a. Dependent variable: GFR ESTIMATED BY CKE-EPI
b. Predictors: (Constant), Serum glucose mg/dL, HDL cholesterol mg/dl, creaser1, TAD (MM/HG), Triglycerides, AGE, LDL-c, BMI=body mass index, Total cholesterol mg/dl, SBP (MM/ HG), glycosylated Hg %
Coeficients
Model		Unstandardized coefficients		Standardized coefficients	t	Sig.	Collinearity statistics
		B	Standard error	Beta			Tolerance	VIF
1	(Constant)	189.216	9.73953		19.4277	2.25392e-59
	Age	-0.935003	0.0801681	-0.383882	-11.663	3.46767e-27	0.79218	1.26234
	Body mass index kg/m2	0.0817888	0.246611	0.0112246	0.331651	0.74033	0.749231	1.3347
	SBP (MM/HG)	-0.170704	0.0630545	-0.116969	-2.70725	0.00708109	0.45974	2.17514
	DBP (MM/HG)	0.0804921	0.124683	0.0280106	0.645576	0.518932	0.455876	2.19358
	Total Cholesterol mg/dL	-0.0660578	0.0170286	-0.15242	-3.87923	0.000122878	0.555908	1.79886
	creaser1	-17.1068	0.994948	-0.525979	-17.1937	8.92043e-50	0.917058	1.09044
	Triglycerides mg/dL	0.00195351	0.00959689	0.00668787	0.203556	0.838806	0.795042	1.25779
	HDL cholesterol mg/dL	-0.104528	0.0471289	-0.0695953	-2.21792	0.0271332	0.87162	1.14729
	LDL cholesterol mg/dL	-0.0549905	0.0323575	-0.0654533	-1.69947	0.0900247	0.578574	1.72839
	Glycosylated Hg %	0.921712	0.379505	0.105798	2.42872	0.0156012	0.452266	2.21109
	Serum glucose mg/dL	-0.0563299	0.0170433	-0.146304	-3.3051	0.00103686	0.437982	2.2832
a. Variable dependiente: TFG ESTIMADA POR CKE-EPI
Diagnoses of collinearity
Model		Eigenvalue	Condition Index	Variance proportions
				(Constant)	Age	Body mass index kg/m2	SBP (MM/HG)	DBP (MM/HG)	Total Cholesterol mg/dL	creaser1	Triglycerides mg/dL	HDL cholesterol mg/dL	LDL cholesterol mg/dL	Glycosylated Hg %	Serum glucose mg/dL
1	1	11.3609	1	3.2543e-05	0.000120081	5.19373e-05	4.26517e-05	2.61641e-05	0.000183789	0.00146072	0.000628052	0.000501913	0.000163096	0.000248016	0.00030961
	2	0.240446	6.87381	0.000129449	4.58656e-05	0.000236147	9.06429e-05	7.38579e-05	0.00093806	0.927158	0.00621396	0.00546947	0.000588059	0.000234095	0.000338206
	3	0.127134	9.45312	0.000780878	0.00108867	0.000423229	0.000359083	0.000364406	0.00020828	0.00283085	0.125225	0.21999	3.11582e-05	0.0323243	0.0811174
	4	0.10211	10.5481	1.39498e-05	2.81588e-06	0.000215992	5.96941e-05	8.00715e-05	0.0059015	0.00800349	0.404932	0.0316957	0.00254179	0.068607	0.0985408
	5	0.0647643	13.2446	0.00116113	0.0215898	0.00466176	0.00553611	0.00264731	0.000377245	0.0189023	0.283379	0.482718	0.015338	0.00110954	0.0227331
	6	0.0403691	16.7757	0.00411805	0.0186515	0.00740352	0.00473338	0.0031608	0.267416	0.00117422	0.0929608	3.92551e-05	0.162198	0.00514023	0.00465232
	7	0.0231416	22.1569	0.000303003	5.26837e-05	0.00535043	0.000166923	0.00011105	0.0474547	0.000111118	0.00703128	0.000428639	0.0191032	0.784235	0.689817
	8	0.0145589	27.9346	0.000537827	0.275151	7.84641e-07	0.00941044	0.00247388	0.483163	0.00533678	0.00802364	0.0112369	0.546609	0.069219	0.0578628
	9	0.0136238	28.8774	0.0023732	0.513045	0.00125622	0.0758515	0.0212138	0.179885	0.00833211	0.0377168	0.0343309	0.247689	0.00802853	0.0163243
	10	0.00688226	40.6294	0.0470336	0.160314	0.534828	0.20487	0.0200793	0.0129909	0.0266398	0.0320647	0.0375481	0.00566886	0.0210224	0.0137651
	11	0.00371193	55.3231	0.671731	0.00948803	0.440623	0.179728	0.0362346	0.00108649	3.50223e-07	0.000717083	0.163343	6.9937e-05	0.00835306	0.0125896
	12	0.00234958	69.5362	0.271785	0.000450461	0.00494937	0.519152	0.913535	0.00039538	5.02497e-05	0.00110703	0.0126971	4.03525e-08	0.00147894	0.00194936
a. Dependent variable: GFR ESTIMATED BY CKD-EPI
